# Supplementary material
Source: publisher figshare collection journal article supplement (https://geolsoc.figshare.com/ndownloader/files/25413752)
Supplement: Supplementary file 1 [file 25413752]

## Sheet: Notes
Compilation of published, unpublished and previously unreported whole rock chemistry from the Erebus volcanic province. The original references to all data are provided for each sample. Only samples where whole rock chemistry were available were reported for isotopic values and chronology.
The EVP Whole rock worksheet reports original values modified only so that all units are reported the same (weight percent and parts per million).
The EVP Whole rock – recalculated worksheet has modified the original data for consistent plotting and reporting.
· TAS classification has been newly assigned based upon the newly determined CIPW normative calculation.
· Major elements recalculated as 100% anhydrous.
· Iron is recast into Fe2O3 and FeO following the recommendations of Middlemost (1989).
· Mg#: Mg#, [Mg/(Mg + Fe2+) x 100] - atomic ratio – has been newly calculated.
· DI: differentiation index – has been newly calculated.

## Sheet: Summary
		Whole rock chemistry	isotopes #	Chronology *
Terror Rift Volcanic Field	Beaufort Island	3	-	-
	Franklin Island	9	1	3
	Submarine volcanic rocks	17	17	13
	sub-total	29	18	16
Ross Island Volcanic Field	Cape Crozier	26	5	-
	DVDP 1,2	99	11	4
	Hut Point Peninsula	60	17	-
	Mount Bird	33	14	-
	Mount Erebus	107	34	15
	Mount Terror	30	17	-
	sub-total	355	106	19
Mount Discovery Volcanic Field	Black Island	10	1	-
	Brown Peninsula	8	-	-
	Dailey Islands	1	-	1
	Minna Bluff	39	1	8
	Mount Discovery	49	1	7
	White Island	25	-	4
	sub-total	132	3	20
Mount Morning Volcanic Field	Mason Spur	110	2	8
	Mount Morning	248	10	22
	sub-total	358	12	30
Southern Local Suite	-	21	1	-
	Total	895	140	85
Other	Historic Erebus bombs	62	28	28
	Ross Island englacial tephra	37	-	-
	Andrill lava	11	-	-
	Andrill glass	68	-	24
	sub-total	178	28	52
	Grand Total	1073	168	137
# isotopes where the whole rock chemistry can be associated with the isotopic data with a high degree of certainty
* Chronology where the whole rock chemistry can be associated with the radiometric age with a high degree of certainty

## Sheet: EVP Whole rock
Area	Locality	Comment 1	Comment 2	TAS Classification	Sample #	Field I.D.	Age (Ma)	Age error (Ma)	Age reference	Mg#	D.I	Majors reference	method	SiO2	TiO2	Al2O3	Fe2O3	FeO	MnO	MgO	CaO	Na2O	K2O	P2O5	BaO	CO2	SO2	SrO	F	Cl	H2O+	H2O-	Loi %	Total	method	FeO	Na2O	Traces reference	Method	Ag	As	B	Ba	Be	Ce	Co	Cr	Cs	Cu
Terror Rift Volcanic Field	Beaufort Island			Tephrite	1							Ellerman, P.J. and Kyle, P.R., 1990. Beaufort Island. In: W.E. LeMasurier and J.W. Thomson (Editors), Volcanoes of the Antarctic Plate and Southern Oceans, Antarctic Research Series 48. American Geophysical Union, Washington, pp. 94-96.	XRF	45	3.3	16.6	5.65	5.85	0.11	4.9	9.25	5	2.3	0.4							1.06	0.84						Ellerman, P.J. and Kyle, P.R., 1990. Beaufort Island. In: W.E. LeMasurier and J.W. Thomson (Editors), Volcanoes of the Antarctic Plate and Southern Oceans, Antarctic Research Series 48. American Geophysical Union, Washington, pp. 94-96.	XRF
Terror Rift Volcanic Field	Beaufort Island			Phonotephrite	2							Ellerman, P.J. and Kyle, P.R., 1990. Beaufort Island. In: W.E. LeMasurier and J.W. Thomson (Editors), Volcanoes of the Antarctic Plate and Southern Oceans, Antarctic Research Series 48. American Geophysical Union, Washington, pp. 94-96.	XRF	45.79	3.12	16.89	11.53		0.21	4.03	8.14	5.65	2.91	0.91									0.34					Ellerman, P.J. and Kyle, P.R., 1990. Beaufort Island. In: W.E. LeMasurier and J.W. Thomson (Editors), Volcanoes of the Antarctic Plate and Southern Oceans, Antarctic Research Series 48. American Geophysical Union, Washington, pp. 94-96.	XRF				905				55		46
Terror Rift Volcanic Field	Beaufort Island			Phonotephrite	3							Ellerman, P.J. and Kyle, P.R., 1990. Beaufort Island. In: W.E. LeMasurier and J.W. Thomson (Editors), Volcanoes of the Antarctic Plate and Southern Oceans, Antarctic Research Series 48. American Geophysical Union, Washington, pp. 94-96.	XRF	46.53	2.49	17.47	10.44		0.24	3.06	7.28	6.57	3.09	0.88									1.4					Ellerman, P.J. and Kyle, P.R., 1990. Beaufort Island. In: W.E. LeMasurier and J.W. Thomson (Editors), Volcanoes of the Antarctic Plate and Southern Oceans, Antarctic Research Series 48. American Geophysical Union, Washington, pp. 94-96.	XRF				nd				nd		26
Mount Discovery Volcanic Field	Black Island			Basanitoid	12							Goldich, S., Treves, S., Suhr, N. and Stuckless, J., 1975. Geochemistry of the Cenozoic volcanic rocks of Ross Island and vicinity, Antarctica. The Journal of Geology, 83(4): 415-435.	AAS	45	3.07	13.3	5.3	6.38	0.19	9.5	12.5	2.61	1.03	0.54	0.03	0.08		0.08			0.23	0.3						Goldich, S., Treves, S., Suhr, N. and Stuckless, J., 1975. Geochemistry of the Cenozoic volcanic rocks of Ross Island and vicinity, Antarctica. The Journal of Geology, 83(4): 415-435.	AAS	0.3			240	2.2	bdl	45	510		85
Mount Discovery Volcanic Field	Black Island			Trachybasalt	16							Goldich, S., Treves, S., Suhr, N. and Stuckless, J., 1975. Geochemistry of the Cenozoic volcanic rocks of Ross Island and vicinity, Antarctica. The Journal of Geology, 83(4): 415-435.	AAS	49.5	2.64	17.2	2.98	6.38	0.21	2.98	7.95	5.02	2.57	1.08	0.08	0.02		0.12			0.73	0.14						Goldich, S., Treves, S., Suhr, N. and Stuckless, J., 1975. Geochemistry of the Cenozoic volcanic rocks of Ross Island and vicinity, Antarctica. The Journal of Geology, 83(4): 415-435.	AAS	0.3			710	3.1	100	bdl	bdl		36
Mount Discovery Volcanic Field	Black Island			Tephriphon	70178							Timms, C.J., 2006. Reconstruction of a grounded ice sheet in McMurdo Sound - evidence from southern Black Island. MSc thesis, University of Otago, 150 pp.	XRF	51.05	2.09	19.14	7.88		0.21	2.22	5.88	7.15	4.08	0.59									0.51					Timms, C.J., 2006. Reconstruction of a grounded ice sheet in McMurdo Sound - evidence from southern Black Island. MSc thesis, University of Otago, 150 pp.	XRF		3		846		188		bdl		9
Mount Discovery Volcanic Field	Black Island			Tephriphon	70193							Timms, C.J., 2006. Reconstruction of a grounded ice sheet in McMurdo Sound - evidence from southern Black Island. MSc thesis, University of Otago, 150 pp.	XRF	55.21	1.12	19.49	5.71		0.22	0.96	3.83	3.83	4.41	0.27									0.76					Timms, C.J., 2006. Reconstruction of a grounded ice sheet in McMurdo Sound - evidence from southern Black Island. MSc thesis, University of Otago, 150 pp.	XRF		bdl		1532		198		bdl		3
Mount Discovery Volcanic Field	Black Island			Phonolite	26							Goldich, S., Treves, S., Suhr, N. and Stuckless, J., 1975. Geochemistry of the Cenozoic volcanic rocks of Ross Island and vicinity, Antarctica. The Journal of Geology, 83(4): 415-435.	AAS	56.8	0.27	21.7	2.8	0.64	0.2	0.07	0.9	10.95	5.56	0.01	bdl	0.01		bdl			0.07	0.13						Goldich, S., Treves, S., Suhr, N. and Stuckless, J., 1975. Geochemistry of the Cenozoic volcanic rocks of Ross Island and vicinity, Antarctica. The Journal of Geology, 83(4): 415-435.	AAS	7.4			15	8.8	300	bdl	bdl		24
Mount Discovery Volcanic Field	Black Island			Phonolite	70176							Timms, C.J., 2006. Reconstruction of a grounded ice sheet in McMurdo Sound - evidence from southern Black Island. MSc thesis, University of Otago, 150 pp.	XRF	57.68	0.49	20.76	3.94		0.18	0.26	2	9.3	5.24	0.07									0.34					Timms, C.J., 2006. Reconstruction of a grounded ice sheet in McMurdo Sound - evidence from southern Black Island. MSc thesis, University of Otago, 150 pp.	XRF		28		162		99		bdl		bdl
Mount Discovery Volcanic Field	Black Island			Phonolite	70177							Timms, C.J., 2006. Reconstruction of a grounded ice sheet in McMurdo Sound - evidence from southern Black Island. MSc thesis, University of Otago, 150 pp.	XRF	57.79	0.28	21.03	2.75		0.19	0.27	1.72	10.02	4.75	0.05									0.62					Timms, C.J., 2006. Reconstruction of a grounded ice sheet in McMurdo Sound - evidence from southern Black Island. MSc thesis, University of Otago, 150 pp.	XRF		9		621		181		bdl		1
Mount Discovery Volcanic Field	Black Island			Phonolite	70200							Timms, C.J., 2006. Reconstruction of a grounded ice sheet in McMurdo Sound - evidence from southern Black Island. MSc thesis, University of Otago, 150 pp.	XRF	57.88	0.47	20.84	3.9		0.18	0.22	1.92	9.34	5.25	0.06									0.33					Timms, C.J., 2006. Reconstruction of a grounded ice sheet in McMurdo Sound - evidence from southern Black Island. MSc thesis, University of Otago, 150 pp.	XRF		4		969		140		bdl		bdl
Mount Discovery Volcanic Field	Black Island			Phonolite	70179							Timms, C.J., 2006. Reconstruction of a grounded ice sheet in McMurdo Sound - evidence from southern Black Island. MSc thesis, University of Otago, 150 pp.	XRF	58.08	0.24	21.24	2.46		0.18	0.24	1.43	10.23	4.97	0.05									0.72					Timms, C.J., 2006. Reconstruction of a grounded ice sheet in McMurdo Sound - evidence from southern Black Island. MSc thesis, University of Otago, 150 pp.	XRF		10		507		168		bdl		1
Mount Discovery Volcanic Field	Black Island			Phonolite	70173							Timms, C.J., 2006. Reconstruction of a grounded ice sheet in McMurdo Sound - evidence from southern Black Island. MSc thesis, University of Otago, 150 pp.	XRF	58.51	0.28	21.41	2.73		0.19	0.25	1.57	10.04	4.86	0.05									0.46					Timms, C.J., 2006. Reconstruction of a grounded ice sheet in McMurdo Sound - evidence from southern Black Island. MSc thesis, University of Otago, 150 pp.	XRF		9		649		182		bdl		2
Mount Discovery Volcanic Field	Brown Peninsula	Brown Peninsula		Basanitoid	1							Goldich, S., Treves, S., Suhr, N. and Stuckless, J., 1975. Geochemistry of the Cenozoic volcanic rocks of Ross Island and vicinity, Antarctica. The Journal of Geology, 83(4): 415-435.	AAS	41.3	4.08	12.9	4.87	7.39	0.2	10.2	11	3.59	0.63	0.82	0.03	0.82		0.1			1.19	0.72						Goldich, S., Treves, S., Suhr, N. and Stuckless, J., 1975. Geochemistry of the Cenozoic volcanic rocks of Ross Island and vicinity, Antarctica. The Journal of Geology, 83(4): 415-435.	AAS	1.4			290	2.7	bdl	56	460		41
Mount Discovery Volcanic Field	Brown Peninsula	Rainbow Ridge		Basanite	6							Kyle, P.R., Adams, J. and Rankin, P.C., 1979. Geology and petrology of the McMurdo Volcanic Group at Rainbow Ridge, Brown Peninsula, Antarctica. Geol. Soc. Am. Bull., 90(7): 676.	XRF	48.46	2.56	18.17	9.53		0.2	3.91	7.24		3.04	0.74									0.07		AAS		6.37		-				493				70		28
Mount Discovery Volcanic Field	Brown Peninsula	Rainbow Ridge		Ne-benmoreite	8							Kyle, P.R., Adams, J. and Rankin, P.C., 1979. Geology and petrology of the McMurdo Volcanic Group at Rainbow Ridge, Brown Peninsula, Antarctica. Geol. Soc. Am. Bull., 90(7): 676.	XRF	52.14	1.4	19.72	6.43		0.19	1.97	4.68		3.9	0.45									0.78		AAS		8.01		-				652				31		15
Mount Discovery Volcanic Field	Brown Peninsula	Rainbow Ridge		Ne-benmoreite	9							Kyle, P.R., Adams, J. and Rankin, P.C., 1979. Geology and petrology of the McMurdo Volcanic Group at Rainbow Ridge, Brown Peninsula, Antarctica. Geol. Soc. Am. Bull., 90(7): 676.	XRF	52.6	1.38	20.02	6.44		0.19	2.1	4.46		4.04	0.44									0.56		AAS		7.77		-				638				53		16
Mount Discovery Volcanic Field	Brown Peninsula	Rainbow Ridge		Ne-benmoreite	10							Kyle, P.R., Adams, J. and Rankin, P.C., 1979. Geology and petrology of the McMurdo Volcanic Group at Rainbow Ridge, Brown Peninsula, Antarctica. Geol. Soc. Am. Bull., 90(7): 676.	XRF	52.87	1.26	20.04	6.09		0.2	1.79	4.41		3.97	0.41									0.67		AAS		8.05		-				645				27		14
Mount Discovery Volcanic Field	Brown Peninsula	Rainbow Ridge		Phonolite	11							Kyle, P.R., Adams, J. and Rankin, P.C., 1979. Geology and petrology of the McMurdo Volcanic Group at Rainbow Ridge, Brown Peninsula, Antarctica. Geol. Soc. Am. Bull., 90(7): 676.	XRF	58.64	0.28	22.55	0.97	0.99	bdl	0.16	1.43		4.98	bdl							0.35	0.08			AAS		9.87		-
Mount Discovery Volcanic Field	Brown Peninsula			Basanitoid	9							Goldich, S., Treves, S., Suhr, N. and Stuckless, J., 1975. Geochemistry of the Cenozoic volcanic rocks of Ross Island and vicinity, Antarctica. The Journal of Geology, 83(4): 415-435.	AAS	43.8	3.47	14.5	4.56	7.85	0.23	7.75	10.3	4.11	1.78	0.98	0.07	0.03		0.14			0.36	0.07						Goldich, S., Treves, S., Suhr, N. and Stuckless, J., 1975. Geochemistry of the Cenozoic volcanic rocks of Ross Island and vicinity, Antarctica. The Journal of Geology, 83(4): 415-435.	AAS	1.7			580	3.5	120	48	350		32
Mount Discovery Volcanic Field	Brown Peninsula			Phonolite	10							Prior, G.T., 1907. Report on the rock specimens collected during the “Discovery” Antarctic Expedition, 1901 - 1904. Natural History, 1: 101-160.	XRF	58.64	0.28	22.55	0.97	0.99	bdl	0.16	1.43	9.87	4.98	bdl							0.43							Prior, G.T., 1907. Report on the rock specimens collected during the “Discovery” Antarctic Expedition, 1901 - 1904. Natural History, 1: 101-160.	XRF
Mount Discovery Volcanic Field	Dailey Islands	Jurgens Island in Dailey Islands group			2007		0.775	0.022	Del Carlo, P., Panter, K.S., Bassett, K., Bracciali, L., Di Vincenzo, G. and Rocchi, S., 2009. The upper lithostratigraphic unit of ANDRILL AND-2A core (Southern McMurdo Sound, Antarctica): Local Pleistocene volcanic sources, paleoenvironmental implications and subsidence in the southern Victoria Land Basin. Global Planet. Change, 69(3): 142-161.			Del Carlo, P., Panter, K.S., Bassett, K., Bracciali, L., Di Vincenzo, G. and Rocchi, S., 2009. The upper lithostratigraphic unit of ANDRILL AND-2A core (Southern McMurdo Sound, Antarctica): Local Pleistocene volcanic sources, paleoenvironmental implications and subsidence in the southern Victoria Land Basin. Global Planet. Change, 69(3): 142-161.	XRF	43.43	3.21	13.49	12.55		0.19	9.41	11.09	3.83	1.66	0.61									0.14					-	-
Terror Rift Volcanic Field	Franklin Island			Basanite	AW82278							Ellerman, P.J. and Kyle, P.R., 1990. Franklin Island. In: W.E. LeMasurier and J.W. Thomson (Editors), Volcanoes of the Antarctic Plate and Southern Oceans, Antarctic Research Series 48. American Geophysical Union, Washington, pp. 91-93.	XRF	43.82	2.15	13.74	11.92		0.27	7.52	9.77	5.93	2.09	0.88									1.2					Ellerman, P.J. and Kyle, P.R., 1990. Franklin Island. In: W.E. LeMasurier and J.W. Thomson (Editors), Volcanoes of the Antarctic Plate and Southern Oceans, Antarctic Research Series 48. American Geophysical Union, Washington, pp. 91-93.	XRF				899				384		45
Terror Rift Volcanic Field	Franklin Island			Basanite	AW82280							Ellerman, P.J. and Kyle, P.R., 1990. Franklin Island. In: W.E. LeMasurier and J.W. Thomson (Editors), Volcanoes of the Antarctic Plate and Southern Oceans, Antarctic Research Series 48. American Geophysical Union, Washington, pp. 91-93.	XRF	44.03	2.16	13.93	11.95		0.26	7.31	9.74	6.51	2.36	0.89									0.97					Ellerman, P.J. and Kyle, P.R., 1990. Franklin Island. In: W.E. LeMasurier and J.W. Thomson (Editors), Volcanoes of the Antarctic Plate and Southern Oceans, Antarctic Research Series 48. American Geophysical Union, Washington, pp. 91-93.	XRF				922				329		46
Terror Rift Volcanic Field	Franklin Island			Basanite	HC-FRI-2							Ellerman, P.J. and Kyle, P.R., 1990. Franklin Island. In: W.E. LeMasurier and J.W. Thomson (Editors), Volcanoes of the Antarctic Plate and Southern Oceans, Antarctic Research Series 48. American Geophysical Union, Washington, pp. 91-93.	XRF	44.09	2.23	13.8	12.93		0.22	9.2	9.96	4.66	1.66	0.63									0.3					Ellerman, P.J. and Kyle, P.R., 1990. Franklin Island. In: W.E. LeMasurier and J.W. Thomson (Editors), Volcanoes of the Antarctic Plate and Southern Oceans, Antarctic Research Series 48. American Geophysical Union, Washington, pp. 91-93.	XRF				nd				nd		54
Terror Rift Volcanic Field	Franklin Island			Basanite	1							Prior, G.T., 1899. Petrographical notes on the rock specimens collected in Antarctic regions during the voyage of H.M.S. Erebus and Terror under Sir James Clark Ross in 1839-43. Mineralalogical Magazine, 12: 69-91.	XRF	45.61	3.48	15.7	6.17	7.29		4.84	6.34	5.06	2.67										2.34						-
Terror Rift Volcanic Field	Franklin Island				NV-16B							Aviado, K. B., Rilling‐Hall, S., Bryce, J. G. & Mukasa, S. B. (2015). Submarine and subaerial lavas in the West Antarctic Rift System: Temporal record of shifting magma source components from the lithosphere and asthenosphere. Geochemistry, Geophysics, Geosystems 16, 4344-4361.	XRF	41.84	2.02	12.62	12.29		0.27	8.76	9.18	5.89	2.11	0.85																			471		97		288
Terror Rift Volcanic Field	Franklin Island				04ANT1-6		3.28	0.04	Rilling, S., Mukasa, S., Wilson, T., Lawver, L. & Hall, C. (2009). New determinations of 40Ar/39Ar isotopic ages and flow volumes for Cenozoic volcanism in the Terror Rift, Ross Sea, Antarctica. Journal of Geophysical Research: Solid Earth 114.			Aviado, K. B., Rilling‐Hall, S., Bryce, J. G. & Mukasa, S. B. (2015). Submarine and subaerial lavas in the West Antarctic Rift System: Temporal record of shifting magma source components from the lithosphere and asthenosphere. Geochemistry, Geophysics, Geosystems 16, 4344-4361.	XRF	46.2	1.85	13.74	12.14		0.21	8.87	9.23	3.69	1.3	0.45																			471		97		288
Terror Rift Volcanic Field	Franklin Island				04ANT1-8							Aviado, K. B., Rilling‐Hall, S., Bryce, J. G. & Mukasa, S. B. (2015). Submarine and subaerial lavas in the West Antarctic Rift System: Temporal record of shifting magma source components from the lithosphere and asthenosphere. Geochemistry, Geophysics, Geosystems 16, 4344-4361.	XRF	44.26	2.17	13.66	11.87		0.26	7.53	9.57	5.36	0.24	0.88																			864		181		276
Terror Rift Volcanic Field	Franklin Island				04ANT1-9		3.38	0.04	Rilling, S., Mukasa, S., Wilson, T., Lawver, L. & Hall, C. (2009). New determinations of 40Ar/39Ar isotopic ages and flow volumes for Cenozoic volcanism in the Terror Rift, Ross Sea, Antarctica. Journal of Geophysical Research: Solid Earth 114.			Aviado, K. B., Rilling‐Hall, S., Bryce, J. G. & Mukasa, S. B. (2015). Submarine and subaerial lavas in the West Antarctic Rift System: Temporal record of shifting magma source components from the lithosphere and asthenosphere. Geochemistry, Geophysics, Geosystems 16, 4344-4361.	XRF	44.117	2.2	13.43	12.58		0.22	9.28	9.62	4.01	1.57	0.62																			546		107		293
Terror Rift Volcanic Field	Franklin Island				04ANT5A-19		3.68	0.16	Rilling, S., Mukasa, S., Wilson, T., Lawver, L. & Hall, C. (2009). New determinations of 40Ar/39Ar isotopic ages and flow volumes for Cenozoic volcanism in the Terror Rift, Ross Sea, Antarctica. Journal of Geophysical Research: Solid Earth 114.			Aviado, K. B., Rilling‐Hall, S., Bryce, J. G. & Mukasa, S. B. (2015). Submarine and subaerial lavas in the West Antarctic Rift System: Temporal record of shifting magma source components from the lithosphere and asthenosphere. Geochemistry, Geophysics, Geosystems 16, 4344-4361.	XRF	43.62	2.13	13.31	11.64		0.26	7.57	9.56	5.34	1.95	0.88																			824		186		293
Mount Morning Volcanic Field	Mason Spur	-	Riviera Ridge Lineage	Basanite	OU78582	336				59.1046	22	Martin, A.P., Cooper, A.F. and Price, R.C., 2013. Petrogenesis of Cenozoic, alkalic volcanic lineages at Mount Morning, West Antarctica and their entrained lithospheric mantle xenoliths: Lithospheric versus asthenospheric mantle sources. Geochim. Cosmochim. Acta, 122(0): 127-152.	XRF	41.035	4.965	13.067	16.4		0.21	9.57	11.135	2.787	0.977	0.592									-0.41	100.328				Martin, A.P., Cooper, A.F. and Price, R.C., 2013. Petrogenesis of Cenozoic, alkalic volcanic lineages at Mount Morning, West Antarctica and their entrained lithospheric mantle xenoliths: Lithospheric versus asthenospheric mantle sources. Geochim. Cosmochim. Acta, 122(0): 127-152.	XRF				0		20	-	351
Mount Morning Volcanic Field	Mason Spur	-	Riviera Ridge Lineage	Basanite	OU78578	304D				73.9926	21.6	Martin, A.P., Cooper, A.F. and Price, R.C., 2013. Petrogenesis of Cenozoic, alkalic volcanic lineages at Mount Morning, West Antarctica and their entrained lithospheric mantle xenoliths: Lithospheric versus asthenospheric mantle sources. Geochim. Cosmochim. Acta, 122(0): 127-152.	XRF	41.625	1.985	11.577	10.49		0.17	12.05	11.015	2.257	1.097	0.332									7.774	100.372				Martin, A.P., Cooper, A.F. and Price, R.C., 2013. Petrogenesis of Cenozoic, alkalic volcanic lineages at Mount Morning, West Antarctica and their entrained lithospheric mantle xenoliths: Lithospheric versus asthenospheric mantle sources. Geochim. Cosmochim. Acta, 122(0): 127-152.	LA-ICPMS				204.027		51.5294	62.972	722.466
Mount Morning Volcanic Field	Mason Spur	-	Riviera Ridge Lineage	Basanite	OU78581	334				60.9464	29.2	Martin, A.P., Cooper, A.F. and Price, R.C., 2013. Petrogenesis of Cenozoic, alkalic volcanic lineages at Mount Morning, West Antarctica and their entrained lithospheric mantle xenoliths: Lithospheric versus asthenospheric mantle sources. Geochim. Cosmochim. Acta, 122(0): 127-152.	XRF	44.785	2.895	12.497	13.22		0.22	8.96	11.925	3.887	0.98	0.83									-0.14	100.059				Martin, A.P., Cooper, A.F. and Price, R.C., 2013. Petrogenesis of Cenozoic, alkalic volcanic lineages at Mount Morning, West Antarctica and their entrained lithospheric mantle xenoliths: Lithospheric versus asthenospheric mantle sources. Geochim. Cosmochim. Acta, 122(0): 127-152.	XRF				600		107	-	250
Mount Morning Volcanic Field	Mason Spur	-	Riviera Ridge Lineage	Basanite	OU78580	331A				60.5091	34.7	Martin, A.P., Cooper, A.F. and Price, R.C., 2013. Petrogenesis of Cenozoic, alkalic volcanic lineages at Mount Morning, West Antarctica and their entrained lithospheric mantle xenoliths: Lithospheric versus asthenospheric mantle sources. Geochim. Cosmochim. Acta, 122(0): 127-152.	XRF	45.255	2.765	14.647	12.01		0.21	7.43	10.035	3.617	1.677	0.622									2.472	100.74				Martin, A.P., Cooper, A.F. and Price, R.C., 2013. Petrogenesis of Cenozoic, alkalic volcanic lineages at Mount Morning, West Antarctica and their entrained lithospheric mantle xenoliths: Lithospheric versus asthenospheric mantle sources. Geochim. Cosmochim. Acta, 122(0): 127-152.	XRF				0		42	-	247
Mount Morning Volcanic Field	Mason Spur	-	Riviera Ridge Lineage	Basanite	OU78583	337B				63.4227	36.3	Martin, A.P., Cooper, A.F. and Price, R.C., 2013. Petrogenesis of Cenozoic, alkalic volcanic lineages at Mount Morning, West Antarctica and their entrained lithospheric mantle xenoliths: Lithospheric versus asthenospheric mantle sources. Geochim. Cosmochim. Acta, 122(0): 127-152.	XRF	45.415	2.685	15.927	11.17		0.2	7.82	9.72	3.977	1.307	0.932									0.834	99.987				Martin, A.P., Cooper, A.F. and Price, R.C., 2013. Petrogenesis of Cenozoic, alkalic volcanic lineages at Mount Morning, West Antarctica and their entrained lithospheric mantle xenoliths: Lithospheric versus asthenospheric mantle sources. Geochim. Cosmochim. Acta, 122(0): 127-152.	XRF				422.421		22.3493	27.1653	102.964
Mount Morning Volcanic Field	Mason Spur	-	Riviera Ridge Lineage	Basanite	OU78579	330A				48.2467	47.8	Martin, A.P., Cooper, A.F. and Price, R.C., 2013. Petrogenesis of Cenozoic, alkalic volcanic lineages at Mount Morning, West Antarctica and their entrained lithospheric mantle xenoliths: Lithospheric versus asthenospheric mantle sources. Geochim. Cosmochim. Acta, 122(0): 127-152.	XRF	46.145	2.935	16.727	11.72		0.22	3.86	7.785	4.757	1.897	0.992									3.518	100.556				Martin, A.P., Cooper, A.F. and Price, R.C., 2013. Petrogenesis of Cenozoic, alkalic volcanic lineages at Mount Morning, West Antarctica and their entrained lithospheric mantle xenoliths: Lithospheric versus asthenospheric mantle sources. Geochim. Cosmochim. Acta, 122(0): 127-152.	XRF				0		71	-	487
Mount Morning Volcanic Field	Mason Spur	-	Riviera Ridge Lineage	Hawaiite	OU78584	338				64.9052	36.2	Martin, A.P., Cooper, A.F. and Price, R.C., 2013. Petrogenesis of Cenozoic, alkalic volcanic lineages at Mount Morning, West Antarctica and their entrained lithospheric mantle xenoliths: Lithospheric versus asthenospheric mantle sources. Geochim. Cosmochim. Acta, 122(0): 127-152.	XRF	46.375	2.775	16.207	11.54		0.2	7.54	9.865	4.007	1.337	0.932									-0.526	100.252				Martin, A.P., Cooper, A.F. and Price, R.C., 2013. Petrogenesis of Cenozoic, alkalic volcanic lineages at Mount Morning, West Antarctica and their entrained lithospheric mantle xenoliths: Lithospheric versus asthenospheric mantle sources. Geochim. Cosmochim. Acta, 122(0): 127-152.	LA-ICPMS				696.673		112.761	60.21	292.328
Mount Morning Volcanic Field	Mason Spur	-	Riviera Ridge Lineage	Basanite	OU78577	304C				53.615	42.4	Martin, A.P., Cooper, A.F. and Price, R.C., 2013. Petrogenesis of Cenozoic, alkalic volcanic lineages at Mount Morning, West Antarctica and their entrained lithospheric mantle xenoliths: Lithospheric versus asthenospheric mantle sources. Geochim. Cosmochim. Acta, 122(0): 127-152.	XRF	46.615	2.845	16.467	11.73		0.21	4.79	9.395	4.367	2.057	0.832									1.118	100.426				Martin, A.P., Cooper, A.F. and Price, R.C., 2013. Petrogenesis of Cenozoic, alkalic volcanic lineages at Mount Morning, West Antarctica and their entrained lithospheric mantle xenoliths: Lithospheric versus asthenospheric mantle sources. Geochim. Cosmochim. Acta, 122(0): 127-152.	LA-ICPMS				542.758		150.913	59.5587	148.681
Mount Morning Volcanic Field	Mason Spur	-	Riviera Ridge Lineage	Phonolite	OU78638	364				12.1241	87.3	Martin, A.P., Cooper, A.F. and Price, R.C., 2013. Petrogenesis of Cenozoic, alkalic volcanic lineages at Mount Morning, West Antarctica and their entrained lithospheric mantle xenoliths: Lithospheric versus asthenospheric mantle sources. Geochim. Cosmochim. Acta, 122(0): 127-152.	XRF	60.84	0.28	18.03	5.17		0.2	0.18	1.2	7.92	5.57	0.06									0.887	100.337				Martin, A.P., Cooper, A.F. and Price, R.C., 2013. Petrogenesis of Cenozoic, alkalic volcanic lineages at Mount Morning, West Antarctica and their entrained lithospheric mantle xenoliths: Lithospheric versus asthenospheric mantle sources. Geochim. Cosmochim. Acta, 122(0): 127-152.	LA-ICPMS				33.7479		186.78	20.165	21.4508
Mount Morning Volcanic Field	Mason Spur	Mason Spur	Mason Spur Lineage	Tephrite	OU78634	339				55.6201	37.5	Martin, A.P., Cooper, A.F. and Price, R.C., 2013. Petrogenesis of Cenozoic, alkalic volcanic lineages at Mount Morning, West Antarctica and their entrained lithospheric mantle xenoliths: Lithospheric versus asthenospheric mantle sources. Geochim. Cosmochim. Acta, 122(0): 127-152.	XRF	45.63	3.72	14.73	13.66		0.22	6.91	9.41	3.94	1.81	1.06									-0.63	100.46				Martin, A.P., Cooper, A.F. and Price, R.C., 2013. Petrogenesis of Cenozoic, alkalic volcanic lineages at Mount Morning, West Antarctica and their entrained lithospheric mantle xenoliths: Lithospheric versus asthenospheric mantle sources. Geochim. Cosmochim. Acta, 122(0): 127-152.	LA-ICPMS				393.042		96.3342	58.9962	217.851
Mount Morning Volcanic Field	Mason Spur	Mason Spur	Mason Spur Lineage	Trachyte	OU78642	380				6.6531	88.6	Martin, A.P., Cooper, A.F. and Price, R.C., 2013. Petrogenesis of Cenozoic, alkalic volcanic lineages at Mount Morning, West Antarctica and their entrained lithospheric mantle xenoliths: Lithospheric versus asthenospheric mantle sources. Geochim. Cosmochim. Acta, 122(0): 127-152.	XRF	58.82	0.42	17.34	8.34		0.23	0.15	0.36	6.83	5.28	0.05									2.903	100.723				Martin, A.P., Cooper, A.F. and Price, R.C., 2013. Petrogenesis of Cenozoic, alkalic volcanic lineages at Mount Morning, West Antarctica and their entrained lithospheric mantle xenoliths: Lithospheric versus asthenospheric mantle sources. Geochim. Cosmochim. Acta, 122(0): 127-152.	XRF				114		280	-	5
Mount Morning Volcanic Field	Mason Spur	Mason Spur	Mason Spur Lineage	Trachyte	OU78636	354				8.7374	81.8	Martin, A.P., Cooper, A.F. and Price, R.C., 2013. Petrogenesis of Cenozoic, alkalic volcanic lineages at Mount Morning, West Antarctica and their entrained lithospheric mantle xenoliths: Lithospheric versus asthenospheric mantle sources. Geochim. Cosmochim. Acta, 122(0): 127-152.	XRF	59.87	0.5	15.3	9.52		0.27	0.23	1.38	6.66	4.92	0.06									1.11	99.82				Martin, A.P., Cooper, A.F. and Price, R.C., 2013. Petrogenesis of Cenozoic, alkalic volcanic lineages at Mount Morning, West Antarctica and their entrained lithospheric mantle xenoliths: Lithospheric versus asthenospheric mantle sources. Geochim. Cosmochim. Acta, 122(0): 127-152.	XRF				79		276	-	6
Mount Morning Volcanic Field	Mason Spur	Mason Spur	Mason Spur Lineage	Trachyte	OU78629	323D				31.7299	85.9	Martin, A.P., Cooper, A.F. and Price, R.C., 2013. Petrogenesis of Cenozoic, alkalic volcanic lineages at Mount Morning, West Antarctica and their entrained lithospheric mantle xenoliths: Lithospheric versus asthenospheric mantle sources. Geochim. Cosmochim. Acta, 122(0): 127-152.	XRF	59.97	0.52	17.85	4.86		0.16	0.57	1.97	6.26	5.57	0.1									2.762	100.592				Martin, A.P., Cooper, A.F. and Price, R.C., 2013. Petrogenesis of Cenozoic, alkalic volcanic lineages at Mount Morning, West Antarctica and their entrained lithospheric mantle xenoliths: Lithospheric versus asthenospheric mantle sources. Geochim. Cosmochim. Acta, 122(0): 127-152.	XRF				135		209	-	bdl
Mount Morning Volcanic Field	Mason Spur	Mason Spur	Mason Spur Lineage	QB-Trachyte	OU78624	309				10.9972	85.08	Martin, A.P., Cooper, A.F. and Price, R.C., 2013. Petrogenesis of Cenozoic, alkalic volcanic lineages at Mount Morning, West Antarctica and their entrained lithospheric mantle xenoliths: Lithospheric versus asthenospheric mantle sources. Geochim. Cosmochim. Acta, 122(0): 127-152.	XRF	60.02	0.52	15.45	8.98		0.3	0.28	1.48	6.06	4.93	0.08									1.47	99.57				Martin, A.P., Cooper, A.F. and Price, R.C., 2013. Petrogenesis of Cenozoic, alkalic volcanic lineages at Mount Morning, West Antarctica and their entrained lithospheric mantle xenoliths: Lithospheric versus asthenospheric mantle sources. Geochim. Cosmochim. Acta, 122(0): 127-152.	XRF				178		250	-	bdl
Mount Morning Volcanic Field	Mason Spur	Mason Spur	Mason Spur Lineage	QB-Trachyte	OU78626	312A				6.78852	83.9	Martin, A.P., Cooper, A.F. and Price, R.C., 2013. Petrogenesis of Cenozoic, alkalic volcanic lineages at Mount Morning, West Antarctica and their entrained lithospheric mantle xenoliths: Lithospheric versus asthenospheric mantle sources. Geochim. Cosmochim. Acta, 122(0): 127-152.	XRF	60.31	0.49	15.32	9.25		0.24	0.17	1.39	6.26	4.97	0.07									1.33	99.8				Martin, A.P., Cooper, A.F. and Price, R.C., 2013. Petrogenesis of Cenozoic, alkalic volcanic lineages at Mount Morning, West Antarctica and their entrained lithospheric mantle xenoliths: Lithospheric versus asthenospheric mantle sources. Geochim. Cosmochim. Acta, 122(0): 127-152.	XRF				71		285	-	66
Mount Morning Volcanic Field	Mason Spur	Mason Spur	Mason Spur Lineage	QB-Trachyte	OU78625	311				10.6569	84.6	Martin, A.P., Cooper, A.F. and Price, R.C., 2013. Petrogenesis of Cenozoic, alkalic volcanic lineages at Mount Morning, West Antarctica and their entrained lithospheric mantle xenoliths: Lithospheric versus asthenospheric mantle sources. Geochim. Cosmochim. Acta, 122(0): 127-152.	XRF	60.43	0.52	15.4	8.97		0.26	0.27	1.35	6.27	4.89	0.09									1.33	99.78				Martin, A.P., Cooper, A.F. and Price, R.C., 2013. Petrogenesis of Cenozoic, alkalic volcanic lineages at Mount Morning, West Antarctica and their entrained lithospheric mantle xenoliths: Lithospheric versus asthenospheric mantle sources. Geochim. Cosmochim. Acta, 122(0): 127-152.	XRF				176		250	-	2
Mount Morning Volcanic Field	Mason Spur	Mason Spur	Mason Spur Lineage	Trachyte	OU78617	335-IV				14.5658	78	Martin, A.P., Cooper, A.F. and Price, R.C., 2013. Petrogenesis of Cenozoic, alkalic volcanic lineages at Mount Morning, West Antarctica and their entrained lithospheric mantle xenoliths: Lithospheric versus asthenospheric mantle sources. Geochim. Cosmochim. Acta, 122(0): 127-152.	XRF	60.65	0.66	15.05	8.6		0.35	0.37	1.16	7.43	4.94	0.09									1.5	100.8				Martin, A.P., Cooper, A.F. and Price, R.C., 2013. Petrogenesis of Cenozoic, alkalic volcanic lineages at Mount Morning, West Antarctica and their entrained lithospheric mantle xenoliths: Lithospheric versus asthenospheric mantle sources. Geochim. Cosmochim. Acta, 122(0): 127-152.	XRF				313		256	-	bdl
Mount Morning Volcanic Field	Mason Spur	Mason Spur	Mason Spur Lineage	Trachyte	OU78635	343	12.6	0.2	Martin, A.P., Cooper, A.F. and Dunlap, W.J., 2010. Geochronology of Mount Morning, Antarctica: Two-phase evolution of a long-lived trachyte-basanite-phonolite eruptive center. Bull. Volcanol., 72: 357-371, doi: 310.1007/s00445-00009-00319-00441.	11.7545	84.9	Martin, A.P., Cooper, A.F. and Price, R.C., 2013. Petrogenesis of Cenozoic, alkalic volcanic lineages at Mount Morning, West Antarctica and their entrained lithospheric mantle xenoliths: Lithospheric versus asthenospheric mantle sources. Geochim. Cosmochim. Acta, 122(0): 127-152.	XRF	60.74	0.56	15.94	6.43		0.26	0.32	1.3	6.37	5.34	0.02									1.983	99.263				Martin, A.P., Cooper, A.F. and Price, R.C., 2013. Petrogenesis of Cenozoic, alkalic volcanic lineages at Mount Morning, West Antarctica and their entrained lithospheric mantle xenoliths: Lithospheric versus asthenospheric mantle sources. Geochim. Cosmochim. Acta, 122(0): 127-152.	XRF				437		177	-	6
Mount Morning Volcanic Field	Mason Spur	Mason Spur	Mason Spur Lineage	QB-Trachyte	OU78641	378C				12.3498	87.7	Martin, A.P., Cooper, A.F. and Price, R.C., 2013. Petrogenesis of Cenozoic, alkalic volcanic lineages at Mount Morning, West Antarctica and their entrained lithospheric mantle xenoliths: Lithospheric versus asthenospheric mantle sources. Geochim. Cosmochim. Acta, 122(0): 127-152.	XRF	61.34	0.51	16.32	6.75		0.27	0.24	0.96	6.35	5.72	0.04									1.93	100.43				Martin, A.P., Cooper, A.F. and Price, R.C., 2013. Petrogenesis of Cenozoic, alkalic volcanic lineages at Mount Morning, West Antarctica and their entrained lithospheric mantle xenoliths: Lithospheric versus asthenospheric mantle sources. Geochim. Cosmochim. Acta, 122(0): 127-152.	XRF				11		252	-	bdl
Mount Morning Volcanic Field	Mason Spur	Mason Spur	Mason Spur Lineage	QB-Trachyte	OU78627	316				15.0006	87.1	Martin, A.P., Cooper, A.F. and Price, R.C., 2013. Petrogenesis of Cenozoic, alkalic volcanic lineages at Mount Morning, West Antarctica and their entrained lithospheric mantle xenoliths: Lithospheric versus asthenospheric mantle sources. Geochim. Cosmochim. Acta, 122(0): 127-152.	XRF	61.35	0.56	15.99	7.41		0.24	0.33	1.21	6.33	5.23	0.08									0.79	99.52				Martin, A.P., Cooper, A.F. and Price, R.C., 2013. Petrogenesis of Cenozoic, alkalic volcanic lineages at Mount Morning, West Antarctica and their entrained lithospheric mantle xenoliths: Lithospheric versus asthenospheric mantle sources. Geochim. Cosmochim. Acta, 122(0): 127-152.	XRF				427		194	-	bdl
Mount Morning Volcanic Field	Mason Spur	Mason Spur	Mason Spur Lineage	QB-Trachyte	OU78630	326				17.7863	83.7	Martin, A.P., Cooper, A.F. and Price, R.C., 2013. Petrogenesis of Cenozoic, alkalic volcanic lineages at Mount Morning, West Antarctica and their entrained lithospheric mantle xenoliths: Lithospheric versus asthenospheric mantle sources. Geochim. Cosmochim. Acta, 122(0): 127-152.	XRF	61.49	0.69	15.46	7.51		0.33	0.41	1.03	6.42	5.43	0.05									2.007	100.827				Martin, A.P., Cooper, A.F. and Price, R.C., 2013. Petrogenesis of Cenozoic, alkalic volcanic lineages at Mount Morning, West Antarctica and their entrained lithospheric mantle xenoliths: Lithospheric versus asthenospheric mantle sources. Geochim. Cosmochim. Acta, 122(0): 127-152.	XRF				71		231	-	bdl
Mount Morning Volcanic Field	Mason Spur	Mason Spur	Mason Spur Lineage	QB-Trachyte	OU78631	327				12.769	84	Martin, A.P., Cooper, A.F. and Price, R.C., 2013. Petrogenesis of Cenozoic, alkalic volcanic lineages at Mount Morning, West Antarctica and their entrained lithospheric mantle xenoliths: Lithospheric versus asthenospheric mantle sources. Geochim. Cosmochim. Acta, 122(0): 127-152.	XRF	61.69	0.6	15.66	7.58		0.31	0.28	0.85	6.87	5.05	0.04									1.393	100.323				Martin, A.P., Cooper, A.F. and Price, R.C., 2013. Petrogenesis of Cenozoic, alkalic volcanic lineages at Mount Morning, West Antarctica and their entrained lithospheric mantle xenoliths: Lithospheric versus asthenospheric mantle sources. Geochim. Cosmochim. Acta, 122(0): 127-152.	XRF				87		216	-	bdl
Mount Morning Volcanic Field	Mason Spur	Mason Spur	Mason Spur Lineage	QB-Trachyte	OU78637	357				10.9488	86	Martin, A.P., Cooper, A.F. and Price, R.C., 2013. Petrogenesis of Cenozoic, alkalic volcanic lineages at Mount Morning, West Antarctica and their entrained lithospheric mantle xenoliths: Lithospheric versus asthenospheric mantle sources. Geochim. Cosmochim. Acta, 122(0): 127-152.	XRF	61.86	0.57	15.75	8.38		0.18	0.26	1.08	6.28	5.23	0.07									1.074	100.734				Martin, A.P., Cooper, A.F. and Price, R.C., 2013. Petrogenesis of Cenozoic, alkalic volcanic lineages at Mount Morning, West Antarctica and their entrained lithospheric mantle xenoliths: Lithospheric versus asthenospheric mantle sources. Geochim. Cosmochim. Acta, 122(0): 127-152.	XRF				174		226	-	1
Mount Morning Volcanic Field	Mason Spur	Mason Spur	Mason Spur Lineage	QB-Trachyte	OU78644	397				12.8345	84.7	Martin, A.P., Cooper, A.F. and Price, R.C., 2013. Petrogenesis of Cenozoic, alkalic volcanic lineages at Mount Morning, West Antarctica and their entrained lithospheric mantle xenoliths: Lithospheric versus asthenospheric mantle sources. Geochim. Cosmochim. Acta, 122(0): 127-152.	XRF	62.28	0.53	16.12	6.19		0.26	0.23	1.11	6.51	5.24	0.07									1.937	100.477				Martin, A.P., Cooper, A.F. and Price, R.C., 2013. Petrogenesis of Cenozoic, alkalic volcanic lineages at Mount Morning, West Antarctica and their entrained lithospheric mantle xenoliths: Lithospheric versus asthenospheric mantle sources. Geochim. Cosmochim. Acta, 122(0): 127-152.	XRF				33		207	-	0
Mount Morning Volcanic Field	Mason Spur	Mason Spur	Mason Spur Lineage	QB-Trachyte	OU78639	374	12.9	0.1	Martin, A.P., Cooper, A.F. and Dunlap, W.J., 2010. Geochronology of Mount Morning, Antarctica: Two-phase evolution of a long-lived trachyte-basanite-phonolite eruptive center. Bull. Volcanol., 72: 357-371, doi: 310.1007/s00445-00009-00319-00441.	3.79088	87.2	Martin, A.P., Cooper, A.F. and Price, R.C., 2013. Petrogenesis of Cenozoic, alkalic volcanic lineages at Mount Morning, West Antarctica and their entrained lithospheric mantle xenoliths: Lithospheric versus asthenospheric mantle sources. Geochim. Cosmochim. Acta, 122(0): 127-152.	XRF	62.63	0.58	15.3	7.04		0.32	0.07	1.45	5.89	4.9	0.04									2.647	100.867				Martin, A.P., Cooper, A.F. and Price, R.C., 2013. Petrogenesis of Cenozoic, alkalic volcanic lineages at Mount Morning, West Antarctica and their entrained lithospheric mantle xenoliths: Lithospheric versus asthenospheric mantle sources. Geochim. Cosmochim. Acta, 122(0): 127-152.	XRF				99		203	-	3
Mount Morning Volcanic Field	Mason Spur	Mason Spur	Mason Spur Lineage	QB-Trachyte	OU78628	322	11.4	0.1	Martin, A.P., Cooper, A.F. and Dunlap, W.J., 2010. Geochronology of Mount Morning, Antarctica: Two-phase evolution of a long-lived trachyte-basanite-phonolite eruptive center. Bull. Volcanol., 72: 357-371, doi: 310.1007/s00445-00009-00319-00441.	11.4022	84.4	Martin, A.P., Cooper, A.F. and Price, R.C., 2013. Petrogenesis of Cenozoic, alkalic volcanic lineages at Mount Morning, West Antarctica and their entrained lithospheric mantle xenoliths: Lithospheric versus asthenospheric mantle sources. Geochim. Cosmochim. Acta, 122(0): 127-152.	XRF	63.44	0.63	14.83	7.39		0.26	0.24	0.97	6.35	5.05	0.04									1.11	100.31				Martin, A.P., Cooper, A.F. and Price, R.C., 2013. Petrogenesis of Cenozoic, alkalic volcanic lineages at Mount Morning, West Antarctica and their entrained lithospheric mantle xenoliths: Lithospheric versus asthenospheric mantle sources. Geochim. Cosmochim. Acta, 122(0): 127-152.	LA-ICPMS				31.8235		198.058	13.5317	16.5302
Mount Morning Volcanic Field	Mason Spur	Mason Spur	Mason Spur Lineage	QB-Trachyte	OU78643	382				14.4535	82.5	Martin, A.P., Cooper, A.F. and Price, R.C., 2013. Petrogenesis of Cenozoic, alkalic volcanic lineages at Mount Morning, West Antarctica and their entrained lithospheric mantle xenoliths: Lithospheric versus asthenospheric mantle sources. Geochim. Cosmochim. Acta, 122(0): 127-152.	XRF	63.87	0.65	14.28	7.74		0.29	0.33	1.06	6.21	4.99	0.07									1.282	100.772				Martin, A.P., Cooper, A.F. and Price, R.C., 2013. Petrogenesis of Cenozoic, alkalic volcanic lineages at Mount Morning, West Antarctica and their entrained lithospheric mantle xenoliths: Lithospheric versus asthenospheric mantle sources. Geochim. Cosmochim. Acta, 122(0): 127-152.	XRF				20		218	-	bdl
Mount Morning Volcanic Field	Mason Spur	Mason Spur	Mason Spur Lineage	QB-Trachyte	OU78640	375				11.7735	88.5	Martin, A.P., Cooper, A.F. and Price, R.C., 2013. Petrogenesis of Cenozoic, alkalic volcanic lineages at Mount Morning, West Antarctica and their entrained lithospheric mantle xenoliths: Lithospheric versus asthenospheric mantle sources. Geochim. Cosmochim. Acta, 122(0): 127-152.	XRF	65.02	0.55	14.23	6.83		0.3	0.23	0.68	5.79	4.53	0.03									2.493	100.683				Martin, A.P., Cooper, A.F. and Price, R.C., 2013. Petrogenesis of Cenozoic, alkalic volcanic lineages at Mount Morning, West Antarctica and their entrained lithospheric mantle xenoliths: Lithospheric versus asthenospheric mantle sources. Geochim. Cosmochim. Acta, 122(0): 127-152.	XRF				128		171	-	7
Mount Morning Volcanic Field	Mason Spur	MS1			AW83581							Wright-Grassham, A.C., 1987. Volcanic geology, mineralogy, and petrogenesis of the Discovery Volcanic Subprovince, Southern Victoria Land, Antarctica - PhD Thesis, New Mexico Institute of Mining and Technology, 460 pp.	XRF	61.37	0.59	14.7		7	0.29	0.35	0.64	6.17	5.14	0.04									2.38					Wright-Grassham, A.C., 1987. Volcanic geology, mineralogy, and petrogenesis of the Discovery Volcanic Subprovince, Southern Victoria Land, Antarctica - PhD Thesis, New Mexico Institute of Mining and Technology, 460 pp.	XRF				44
Mount Morning Volcanic Field	Mason Spur	MS1			AW83422							Wright-Grassham, A.C., 1987. Volcanic geology, mineralogy, and petrogenesis of the Discovery Volcanic Subprovince, Southern Victoria Land, Antarctica - PhD Thesis, New Mexico Institute of Mining and Technology, 460 pp.	XRF	61.4	0.59	13.93		7.38	0.32	0.5	0.97	6.24	4.66	0.05									2.06					Wright-Grassham, A.C., 1987. Volcanic geology, mineralogy, and petrogenesis of the Discovery Volcanic Subprovince, Southern Victoria Land, Antarctica - PhD Thesis, New Mexico Institute of Mining and Technology, 460 pp.	XRF				18
Mount Morning Volcanic Field	Mason Spur	MS1			AW83441							Wright-Grassham, A.C., 1987. Volcanic geology, mineralogy, and petrogenesis of the Discovery Volcanic Subprovince, Southern Victoria Land, Antarctica - PhD Thesis, New Mexico Institute of Mining and Technology, 460 pp.	XRF	61.42	0.68	14.54		7.16	0.36	0.42	0.97	6.1	5.06	0.06									1.96					Wright-Grassham, A.C., 1987. Volcanic geology, mineralogy, and petrogenesis of the Discovery Volcanic Subprovince, Southern Victoria Land, Antarctica - PhD Thesis, New Mexico Institute of Mining and Technology, 460 pp.	XRF				63
Mount Morning Volcanic Field	Mason Spur	MS1			AW83508							Wright-Grassham, A.C., 1987. Volcanic geology, mineralogy, and petrogenesis of the Discovery Volcanic Subprovince, Southern Victoria Land, Antarctica - PhD Thesis, New Mexico Institute of Mining and Technology, 460 pp.	XRF	62.25	0.49	16.21		5.54	0.24	0.32	0.96	6.82	5.26	0.05									0.8					Wright-Grassham, A.C., 1987. Volcanic geology, mineralogy, and petrogenesis of the Discovery Volcanic Subprovince, Southern Victoria Land, Antarctica - PhD Thesis, New Mexico Institute of Mining and Technology, 460 pp.	XRF				44
Mount Morning Volcanic Field	Mason Spur	MS1			AW85865							Wright-Grassham, A.C., 1987. Volcanic geology, mineralogy, and petrogenesis of the Discovery Volcanic Subprovince, Southern Victoria Land, Antarctica - PhD Thesis, New Mexico Institute of Mining and Technology, 460 pp.	XRF	62.39	0.51	16.49		5.57	0.29	0.54	1.01	6.86	5.35	0.05									0.35		INAA	5.65		Wright-Grassham, A.C., 1987. Volcanic geology, mineralogy, and petrogenesis of the Discovery Volcanic Subprovince, Southern Victoria Land, Antarctica - PhD Thesis, New Mexico Institute of Mining and Technology, 460 pp.	XRF				36		261			0.33
Mount Morning Volcanic Field	Mason Spur	MS1			AW85803							Wright-Grassham, A.C., 1987. Volcanic geology, mineralogy, and petrogenesis of the Discovery Volcanic Subprovince, Southern Victoria Land, Antarctica - PhD Thesis, New Mexico Institute of Mining and Technology, 460 pp.	XRF	62.48	0.7	15.16		7.26	0.38	0.26	0.71	6.02	5.02	0.03									0.99					Wright-Grassham, A.C., 1987. Volcanic geology, mineralogy, and petrogenesis of the Discovery Volcanic Subprovince, Southern Victoria Land, Antarctica - PhD Thesis, New Mexico Institute of Mining and Technology, 460 pp.	XRF				150
Mount Morning Volcanic Field	Mason Spur	MS1			AW83569							Wright-Grassham, A.C., 1987. Volcanic geology, mineralogy, and petrogenesis of the Discovery Volcanic Subprovince, Southern Victoria Land, Antarctica - PhD Thesis, New Mexico Institute of Mining and Technology, 460 pp.	XRF	63.43	0.66	14.79		5.85	0.27	0.16	0.52	5.93	5.14	0.03									1.46					Wright-Grassham, A.C., 1987. Volcanic geology, mineralogy, and petrogenesis of the Discovery Volcanic Subprovince, Southern Victoria Land, Antarctica - PhD Thesis, New Mexico Institute of Mining and Technology, 460 pp.	XRF				24
Mount Morning Volcanic Field	Mason Spur	MS2			AW85863							Wright-Grassham, A.C., 1987. Volcanic geology, mineralogy, and petrogenesis of the Discovery Volcanic Subprovince, Southern Victoria Land, Antarctica - PhD Thesis, New Mexico Institute of Mining and Technology, 460 pp.	XRF	50.58	2.78	15.99		10.1	0.29	3.22	6.73	5.45	2.2	1.26									1.18		INAA	10.35		Wright-Grassham, A.C., 1987. Volcanic geology, mineralogy, and petrogenesis of the Discovery Volcanic Subprovince, Southern Victoria Land, Antarctica - PhD Thesis, New Mexico Institute of Mining and Technology, 460 pp.	XRF				996		155			0.24
Mount Morning Volcanic Field	Mason Spur	MS2			AW85831							Wright-Grassham, A.C., 1987. Volcanic geology, mineralogy, and petrogenesis of the Discovery Volcanic Subprovince, Southern Victoria Land, Antarctica - PhD Thesis, New Mexico Institute of Mining and Technology, 460 pp.	XRF	51.17	2.29	16.14		9.56	0.26	2.96	6.13	5.11	2.43	0.87									1.71					Wright-Grassham, A.C., 1987. Volcanic geology, mineralogy, and petrogenesis of the Discovery Volcanic Subprovince, Southern Victoria Land, Antarctica - PhD Thesis, New Mexico Institute of Mining and Technology, 460 pp.	XRF				754
Mount Morning Volcanic Field	Mason Spur	MS2			AW83511							Wright-Grassham, A.C., 1987. Volcanic geology, mineralogy, and petrogenesis of the Discovery Volcanic Subprovince, Southern Victoria Land, Antarctica - PhD Thesis, New Mexico Institute of Mining and Technology, 460 pp.	XRF	61.71	0.57	15.15		6.66	0.28	0.4	0.82	7.24	5.14	0.07									0.64		INAA	6.77		Wright-Grassham, A.C., 1987. Volcanic geology, mineralogy, and petrogenesis of the Discovery Volcanic Subprovince, Southern Victoria Land, Antarctica - PhD Thesis, New Mexico Institute of Mining and Technology, 460 pp.	XRF				85		220			0.79	19
Mount Morning Volcanic Field	Mason Spur	MS3			AW83503							Wright-Grassham, A.C., 1987. Volcanic geology, mineralogy, and petrogenesis of the Discovery Volcanic Subprovince, Southern Victoria Land, Antarctica - PhD Thesis, New Mexico Institute of Mining and Technology, 460 pp.	XRF	58.37	0.39	16.61		6.56	0.25	0.24	1.13	7.1	5	0.05									2.7		INAA	6.66		Wright-Grassham, A.C., 1987. Volcanic geology, mineralogy, and petrogenesis of the Discovery Volcanic Subprovince, Southern Victoria Land, Antarctica - PhD Thesis, New Mexico Institute of Mining and Technology, 460 pp.	XRF				104		261		12	3.24
Mount Morning Volcanic Field	Mason Spur	MS3			AW83496							Wright-Grassham, A.C., 1987. Volcanic geology, mineralogy, and petrogenesis of the Discovery Volcanic Subprovince, Southern Victoria Land, Antarctica - PhD Thesis, New Mexico Institute of Mining and Technology, 460 pp.	XRF	59.29	0.39	16.99		6.19	0.17	0.16	0.49	6.82	5.39	0.05									2.6		INAA	6.31		Wright-Grassham, A.C., 1987. Volcanic geology, mineralogy, and petrogenesis of the Discovery Volcanic Subprovince, Southern Victoria Land, Antarctica - PhD Thesis, New Mexico Institute of Mining and Technology, 460 pp.	XRF				114		266			2.25
Mount Morning Volcanic Field	Mason Spur	MS3			AW85851							Wright-Grassham, A.C., 1987. Volcanic geology, mineralogy, and petrogenesis of the Discovery Volcanic Subprovince, Southern Victoria Land, Antarctica - PhD Thesis, New Mexico Institute of Mining and Technology, 460 pp.	XRF	60.17	0.39	18.05		4.91	0.22	0.38	1.01	6.72	5.2	0.06									2.99					Wright-Grassham, A.C., 1987. Volcanic geology, mineralogy, and petrogenesis of the Discovery Volcanic Subprovince, Southern Victoria Land, Antarctica - PhD Thesis, New Mexico Institute of Mining and Technology, 460 pp.	XRF				59
Mount Morning Volcanic Field	Mason Spur	MS3			AW85850							Wright-Grassham, A.C., 1987. Volcanic geology, mineralogy, and petrogenesis of the Discovery Volcanic Subprovince, Southern Victoria Land, Antarctica - PhD Thesis, New Mexico Institute of Mining and Technology, 460 pp.	XRF	60.31	0.29	17.76		4.87	0.22	0.42	0.91	6.69	5.2	0.05									3.07					Wright-Grassham, A.C., 1987. Volcanic geology, mineralogy, and petrogenesis of the Discovery Volcanic Subprovince, Southern Victoria Land, Antarctica - PhD Thesis, New Mexico Institute of Mining and Technology, 460 pp.	XRF				33						15
Mount Morning Volcanic Field	Mason Spur	MS3			AW83711							Wright-Grassham, A.C., 1987. Volcanic geology, mineralogy, and petrogenesis of the Discovery Volcanic Subprovince, Southern Victoria Land, Antarctica - PhD Thesis, New Mexico Institute of Mining and Technology, 460 pp.	XRF	60.41	0.61	14.82		8.04	0.45	0.16	0.46	7.05	4.92	0.04									1.32					Wright-Grassham, A.C., 1987. Volcanic geology, mineralogy, and petrogenesis of the Discovery Volcanic Subprovince, Southern Victoria Land, Antarctica - PhD Thesis, New Mexico Institute of Mining and Technology, 460 pp.	XRF				25
Mount Morning Volcanic Field	Mason Spur	MS3			AW83430							Wright-Grassham, A.C., 1987. Volcanic geology, mineralogy, and petrogenesis of the Discovery Volcanic Subprovince, Southern Victoria Land, Antarctica - PhD Thesis, New Mexico Institute of Mining and Technology, 460 pp.	XRF	60.72	0.37	16.93		5.58	0.24	0.37	0.82	7.11	5.15	0.05									2.11					Wright-Grassham, A.C., 1987. Volcanic geology, mineralogy, and petrogenesis of the Discovery Volcanic Subprovince, Southern Victoria Land, Antarctica - PhD Thesis, New Mexico Institute of Mining and Technology, 460 pp.	XRF				43						15
Mount Morning Volcanic Field	Mason Spur	MS3			AW85818							Wright-Grassham, A.C., 1987. Volcanic geology, mineralogy, and petrogenesis of the Discovery Volcanic Subprovince, Southern Victoria Land, Antarctica - PhD Thesis, New Mexico Institute of Mining and Technology, 460 pp.	XRF	61.5	0.57	15.1		7.17	0.34	0.51	1	6.27	4.78	0.05									1.51		INAA	8.82		Wright-Grassham, A.C., 1987. Volcanic geology, mineralogy, and petrogenesis of the Discovery Volcanic Subprovince, Southern Victoria Land, Antarctica - PhD Thesis, New Mexico Institute of Mining and Technology, 460 pp.	XRF				172		202			0.77
Mount Morning Volcanic Field	Mason Spur	MS3			AW83445							Wright-Grassham, A.C., 1987. Volcanic geology, mineralogy, and petrogenesis of the Discovery Volcanic Subprovince, Southern Victoria Land, Antarctica - PhD Thesis, New Mexico Institute of Mining and Technology, 460 pp.	XRF	61.57	0.53	15.56		6.45	0.27	0.28	0.95	6.92	5.09	0.04									0.75					Wright-Grassham, A.C., 1987. Volcanic geology, mineralogy, and petrogenesis of the Discovery Volcanic Subprovince, Southern Victoria Land, Antarctica - PhD Thesis, New Mexico Institute of Mining and Technology, 460 pp.	XRF				35
Mount Morning Volcanic Field	Mason Spur	MS3			AW83678							Wright-Grassham, A.C., 1987. Volcanic geology, mineralogy, and petrogenesis of the Discovery Volcanic Subprovince, Southern Victoria Land, Antarctica - PhD Thesis, New Mexico Institute of Mining and Technology, 460 pp.	XRF	61.71	0.56	15.79		6.23	0.21	0.3	1.14	6.64	5.25	0.09									1.18					Wright-Grassham, A.C., 1987. Volcanic geology, mineralogy, and petrogenesis of the Discovery Volcanic Subprovince, Southern Victoria Land, Antarctica - PhD Thesis, New Mexico Institute of Mining and Technology, 460 pp.	XRF				109				22		15
Mount Morning Volcanic Field	Mason Spur	MS3			AW83449							Wright-Grassham, A.C., 1987. Volcanic geology, mineralogy, and petrogenesis of the Discovery Volcanic Subprovince, Southern Victoria Land, Antarctica - PhD Thesis, New Mexico Institute of Mining and Technology, 460 pp.	XRF	61.72	0.48	15.43		5.69	0.27	0.34	0.97	5.86	5.47	0.05									1.99					Wright-Grassham, A.C., 1987. Volcanic geology, mineralogy, and petrogenesis of the Discovery Volcanic Subprovince, Southern Victoria Land, Antarctica - PhD Thesis, New Mexico Institute of Mining and Technology, 460 pp.	XRF				32
Mount Morning Volcanic Field	Mason Spur	MS3			AW83515							Wright-Grassham, A.C., 1987. Volcanic geology, mineralogy, and petrogenesis of the Discovery Volcanic Subprovince, Southern Victoria Land, Antarctica - PhD Thesis, New Mexico Institute of Mining and Technology, 460 pp.	XRF	62.11	0.52	15.45		6.64	0.3	0.71	1.08	6.71	5.09	0.06									0.74					Wright-Grassham, A.C., 1987. Volcanic geology, mineralogy, and petrogenesis of the Discovery Volcanic Subprovince, Southern Victoria Land, Antarctica - PhD Thesis, New Mexico Institute of Mining and Technology, 460 pp.	XRF				91
Mount Morning Volcanic Field	Mason Spur	MS3			AW85847							Wright-Grassham, A.C., 1987. Volcanic geology, mineralogy, and petrogenesis of the Discovery Volcanic Subprovince, Southern Victoria Land, Antarctica - PhD Thesis, New Mexico Institute of Mining and Technology, 460 pp.	XRF	62.19	0.66	15.05		6.8	0.34	0.59	1.01	6.56	5.07	0.04									0.85		INAA	6.89		Wright-Grassham, A.C., 1987. Volcanic geology, mineralogy, and petrogenesis of the Discovery Volcanic Subprovince, Southern Victoria Land, Antarctica - PhD Thesis, New Mexico Institute of Mining and Technology, 460 pp.	XRF				30		214			0.42
Mount Morning Volcanic Field	Mason Spur	MS3			AW83484							Wright-Grassham, A.C., 1987. Volcanic geology, mineralogy, and petrogenesis of the Discovery Volcanic Subprovince, Southern Victoria Land, Antarctica - PhD Thesis, New Mexico Institute of Mining and Technology, 460 pp.	XRF	62.28	0.58	15.18		6.74	0.38	0.34	0.51	5.97	4.89	0.03									2.16					Wright-Grassham, A.C., 1987. Volcanic geology, mineralogy, and petrogenesis of the Discovery Volcanic Subprovince, Southern Victoria Land, Antarctica - PhD Thesis, New Mexico Institute of Mining and Technology, 460 pp.	XRF				153
Mount Morning Volcanic Field	Mason Spur	MS3			AW85809							Wright-Grassham, A.C., 1987. Volcanic geology, mineralogy, and petrogenesis of the Discovery Volcanic Subprovince, Southern Victoria Land, Antarctica - PhD Thesis, New Mexico Institute of Mining and Technology, 460 pp.	XRF	62.34	0.59	15.55		6.41	0.3	0.34	0.85	6.33	5.03	0.04									1.74					Wright-Grassham, A.C., 1987. Volcanic geology, mineralogy, and petrogenesis of the Discovery Volcanic Subprovince, Southern Victoria Land, Antarctica - PhD Thesis, New Mexico Institute of Mining and Technology, 460 pp.	XRF				134				13
Mount Morning Volcanic Field	Mason Spur	MS3			AW85837							Wright-Grassham, A.C., 1987. Volcanic geology, mineralogy, and petrogenesis of the Discovery Volcanic Subprovince, Southern Victoria Land, Antarctica - PhD Thesis, New Mexico Institute of Mining and Technology, 460 pp.	XRF	62.56	0.53	15.81		6.47	0.32	0.36	1.02	7.06	5.08	0.05									-0.27		INAA	6.53		Wright-Grassham, A.C., 1987. Volcanic geology, mineralogy, and petrogenesis of the Discovery Volcanic Subprovince, Southern Victoria Land, Antarctica - PhD Thesis, New Mexico Institute of Mining and Technology, 460 pp.	XRF				32		246			1.12
Mount Morning Volcanic Field	Mason Spur	MS3			AW85860							Wright-Grassham, A.C., 1987. Volcanic geology, mineralogy, and petrogenesis of the Discovery Volcanic Subprovince, Southern Victoria Land, Antarctica - PhD Thesis, New Mexico Institute of Mining and Technology, 460 pp.	XRF	62.59	0.58	14.84		7.13	0.19	0.5	1.07	6.89	4.8	0.05									1.07		INAA	7.14		Wright-Grassham, A.C., 1987. Volcanic geology, mineralogy, and petrogenesis of the Discovery Volcanic Subprovince, Southern Victoria Land, Antarctica - PhD Thesis, New Mexico Institute of Mining and Technology, 460 pp.	XRF				353		187			0.38
Mount Morning Volcanic Field	Mason Spur	MS3			AW83491							Wright-Grassham, A.C., 1987. Volcanic geology, mineralogy, and petrogenesis of the Discovery Volcanic Subprovince, Southern Victoria Land, Antarctica - PhD Thesis, New Mexico Institute of Mining and Technology, 460 pp.	XRF	62.62	0.49	15.75		5.78	0.25	0.17	0.51	6.91	5.63	0.04									1.26					Wright-Grassham, A.C., 1987. Volcanic geology, mineralogy, and petrogenesis of the Discovery Volcanic Subprovince, Southern Victoria Land, Antarctica - PhD Thesis, New Mexico Institute of Mining and Technology, 460 pp.	XRF				23
Mount Morning Volcanic Field	Mason Spur	MS3			AW83580							Wright-Grassham, A.C., 1987. Volcanic geology, mineralogy, and petrogenesis of the Discovery Volcanic Subprovince, Southern Victoria Land, Antarctica - PhD Thesis, New Mexico Institute of Mining and Technology, 460 pp.	XRF	62.82	0.6	14.79		6.86	0.33	0.33	0.46	6.51	5.11	0.06									1.53		INAA	6.89		Wright-Grassham, A.C., 1987. Volcanic geology, mineralogy, and petrogenesis of the Discovery Volcanic Subprovince, Southern Victoria Land, Antarctica - PhD Thesis, New Mexico Institute of Mining and Technology, 460 pp.	XRF				32		223			0.63
Mount Morning Volcanic Field	Mason Spur	MS3			AW83709							Wright-Grassham, A.C., 1987. Volcanic geology, mineralogy, and petrogenesis of the Discovery Volcanic Subprovince, Southern Victoria Land, Antarctica - PhD Thesis, New Mexico Institute of Mining and Technology, 460 pp.	XRF	62.86	0.56	16.51		5.16	0.08	0.27	0.92	6.63	5.34	0.05									0.67					Wright-Grassham, A.C., 1987. Volcanic geology, mineralogy, and petrogenesis of the Discovery Volcanic Subprovince, Southern Victoria Land, Antarctica - PhD Thesis, New Mexico Institute of Mining and Technology, 460 pp.	XRF				39				19
Mount Morning Volcanic Field	Mason Spur	MS3			AW83710							Wright-Grassham, A.C., 1987. Volcanic geology, mineralogy, and petrogenesis of the Discovery Volcanic Subprovince, Southern Victoria Land, Antarctica - PhD Thesis, New Mexico Institute of Mining and Technology, 460 pp.	XRF	62.95	0.6	14.25		7.79	0.35	0.19	0.74	6.07	4.83	0.04									1.19		INAA	8.02		Wright-Grassham, A.C., 1987. Volcanic geology, mineralogy, and petrogenesis of the Discovery Volcanic Subprovince, Southern Victoria Land, Antarctica - PhD Thesis, New Mexico Institute of Mining and Technology, 460 pp.	XRF				27		307		15	0.34
Mount Morning Volcanic Field	Mason Spur	MS3			AW85833							Wright-Grassham, A.C., 1987. Volcanic geology, mineralogy, and petrogenesis of the Discovery Volcanic Subprovince, Southern Victoria Land, Antarctica - PhD Thesis, New Mexico Institute of Mining and Technology, 460 pp.	XRF	62.96	0.59	15.07		6.29	0.22	0.42	0.87	7.51	5.04	0.04									0.44					Wright-Grassham, A.C., 1987. Volcanic geology, mineralogy, and petrogenesis of the Discovery Volcanic Subprovince, Southern Victoria Land, Antarctica - PhD Thesis, New Mexico Institute of Mining and Technology, 460 pp.	XRF
Mount Morning Volcanic Field	Mason Spur	MS3			AW85830							Wright-Grassham, A.C., 1987. Volcanic geology, mineralogy, and petrogenesis of the Discovery Volcanic Subprovince, Southern Victoria Land, Antarctica - PhD Thesis, New Mexico Institute of Mining and Technology, 460 pp.	XRF	63.14	0.66	15.07		6.25	0.3	0.28	0.71	6.43	5.02	0.04									1.47					Wright-Grassham, A.C., 1987. Volcanic geology, mineralogy, and petrogenesis of the Discovery Volcanic Subprovince, Southern Victoria Land, Antarctica - PhD Thesis, New Mexico Institute of Mining and Technology, 460 pp.	XRF				52				14		15
Mount Morning Volcanic Field	Mason Spur	MS3			AW83502A							Wright-Grassham, A.C., 1987. Volcanic geology, mineralogy, and petrogenesis of the Discovery Volcanic Subprovince, Southern Victoria Land, Antarctica - PhD Thesis, New Mexico Institute of Mining and Technology, 460 pp.	XRF	63.2	0.62	14.61		6.94	0.31	0.23	0.5	5.68	4.98	0.04									1.99		INAA	7.09		Wright-Grassham, A.C., 1987. Volcanic geology, mineralogy, and petrogenesis of the Discovery Volcanic Subprovince, Southern Victoria Land, Antarctica - PhD Thesis, New Mexico Institute of Mining and Technology, 460 pp.	XRF				52		260		10	0.48	15
Mount Morning Volcanic Field	Mason Spur	MS3			AW85869							Wright-Grassham, A.C., 1987. Volcanic geology, mineralogy, and petrogenesis of the Discovery Volcanic Subprovince, Southern Victoria Land, Antarctica - PhD Thesis, New Mexico Institute of Mining and Technology, 460 pp.	XRF	63.29	0.57	15.86		5.63	0.28	0.38	0.75	6.68	4.99	0.03									1.48					Wright-Grassham, A.C., 1987. Volcanic geology, mineralogy, and petrogenesis of the Discovery Volcanic Subprovince, Southern Victoria Land, Antarctica - PhD Thesis, New Mexico Institute of Mining and Technology, 460 pp.	XRF				92
Mount Morning Volcanic Field	Mason Spur	MS3			AW83510							Wright-Grassham, A.C., 1987. Volcanic geology, mineralogy, and petrogenesis of the Discovery Volcanic Subprovince, Southern Victoria Land, Antarctica - PhD Thesis, New Mexico Institute of Mining and Technology, 460 pp.	XRF	63.32	0.51	14.96		6.08	0.13	0.32	0.78	6.06	4.7	0.04									1.78					Wright-Grassham, A.C., 1987. Volcanic geology, mineralogy, and petrogenesis of the Discovery Volcanic Subprovince, Southern Victoria Land, Antarctica - PhD Thesis, New Mexico Institute of Mining and Technology, 460 pp.	XRF				35				16
Mount Morning Volcanic Field	Mason Spur	MS3			AW83567							Wright-Grassham, A.C., 1987. Volcanic geology, mineralogy, and petrogenesis of the Discovery Volcanic Subprovince, Southern Victoria Land, Antarctica - PhD Thesis, New Mexico Institute of Mining and Technology, 460 pp.	XRF	63.7	0.61	14.66		6.37	0.32	0.19	0.49	6.41	4.93	0.05									1.49					Wright-Grassham, A.C., 1987. Volcanic geology, mineralogy, and petrogenesis of the Discovery Volcanic Subprovince, Southern Victoria Land, Antarctica - PhD Thesis, New Mexico Institute of Mining and Technology, 460 pp.	XRF				26
Mount Morning Volcanic Field	Mason Spur	MS3			AW83485							Wright-Grassham, A.C., 1987. Volcanic geology, mineralogy, and petrogenesis of the Discovery Volcanic Subprovince, Southern Victoria Land, Antarctica - PhD Thesis, New Mexico Institute of Mining and Technology, 460 pp.	XRF	64.18	0.63	16.32		4.87	0.08	0.53	0.66	7.04	5.35	0.04									0.54					Wright-Grassham, A.C., 1987. Volcanic geology, mineralogy, and petrogenesis of the Discovery Volcanic Subprovince, Southern Victoria Land, Antarctica - PhD Thesis, New Mexico Institute of Mining and Technology, 460 pp.	XRF				129
Mount Morning Volcanic Field	Mason Spur	MS3			AW83712							Wright-Grassham, A.C., 1987. Volcanic geology, mineralogy, and petrogenesis of the Discovery Volcanic Subprovince, Southern Victoria Land, Antarctica - PhD Thesis, New Mexico Institute of Mining and Technology, 460 pp.	XRF	66.68	0.53	12.72		6.59	0.2	0.32	0.56	6.53	4.84	0.04									0.67		INAA	6.71		Wright-Grassham, A.C., 1987. Volcanic geology, mineralogy, and petrogenesis of the Discovery Volcanic Subprovince, Southern Victoria Land, Antarctica - PhD Thesis, New Mexico Institute of Mining and Technology, 460 pp.	XRF						227		13	0.47
Mount Morning Volcanic Field	Mason Spur	MS3			AW83411							Wright-Grassham, A.C., 1987. Volcanic geology, mineralogy, and petrogenesis of the Discovery Volcanic Subprovince, Southern Victoria Land, Antarctica - PhD Thesis, New Mexico Institute of Mining and Technology, 460 pp.	XRF	66.82	0.84	16.82		2.31	0.04	0.17	0.46	6.18	5.97	0.15									0.54					Wright-Grassham, A.C., 1987. Volcanic geology, mineralogy, and petrogenesis of the Discovery Volcanic Subprovince, Southern Victoria Land, Antarctica - PhD Thesis, New Mexico Institute of Mining and Technology, 460 pp.	XRF				38
Mount Morning Volcanic Field	Mason Spur	MS5			AW83701							Wright-Grassham, A.C., 1987. Volcanic geology, mineralogy, and petrogenesis of the Discovery Volcanic Subprovince, Southern Victoria Land, Antarctica - PhD Thesis, New Mexico Institute of Mining and Technology, 460 pp.	XRF	59.14	0.42	17.54		6.91	0.14	0.15	0.76	5.21	5.16	0.05									3.2					Wright-Grassham, A.C., 1987. Volcanic geology, mineralogy, and petrogenesis of the Discovery Volcanic Subprovince, Southern Victoria Land, Antarctica - PhD Thesis, New Mexico Institute of Mining and Technology, 460 pp.	XRF				149
Mount Morning Volcanic Field	Mason Spur	MS5			AW85829							Wright-Grassham, A.C., 1987. Volcanic geology, mineralogy, and petrogenesis of the Discovery Volcanic Subprovince, Southern Victoria Land, Antarctica - PhD Thesis, New Mexico Institute of Mining and Technology, 460 pp.	XRF	59.46	0.5	15.31		7.86	0.31	0.33	1.36	6.61	4.89	0.04									2.31					Wright-Grassham, A.C., 1987. Volcanic geology, mineralogy, and petrogenesis of the Discovery Volcanic Subprovince, Southern Victoria Land, Antarctica - PhD Thesis, New Mexico Institute of Mining and Technology, 460 pp.	XRF				168
Mount Morning Volcanic Field	Mason Spur	MS5			AW83532							Wright-Grassham, A.C., 1987. Volcanic geology, mineralogy, and petrogenesis of the Discovery Volcanic Subprovince, Southern Victoria Land, Antarctica - PhD Thesis, New Mexico Institute of Mining and Technology, 460 pp.	XRF	59.52	0.47	14.98		8.49	0.37	0.25	1.36	6.67	4.88	0.02									2.18					Wright-Grassham, A.C., 1987. Volcanic geology, mineralogy, and petrogenesis of the Discovery Volcanic Subprovince, Southern Victoria Land, Antarctica - PhD Thesis, New Mexico Institute of Mining and Technology, 460 pp.	XRF				43
Mount Morning Volcanic Field	Mason Spur	MS5			AW83516							Wright-Grassham, A.C., 1987. Volcanic geology, mineralogy, and petrogenesis of the Discovery Volcanic Subprovince, Southern Victoria Land, Antarctica - PhD Thesis, New Mexico Institute of Mining and Technology, 460 pp.	XRF	59.9	0.58	14.05		7.37	0.36	0.32	0.86	7.82	4.46	0.09									2.04					Wright-Grassham, A.C., 1987. Volcanic geology, mineralogy, and petrogenesis of the Discovery Volcanic Subprovince, Southern Victoria Land, Antarctica - PhD Thesis, New Mexico Institute of Mining and Technology, 460 pp.	XRF
Mount Morning Volcanic Field	Mason Spur	MS5			AW83453							Wright-Grassham, A.C., 1987. Volcanic geology, mineralogy, and petrogenesis of the Discovery Volcanic Subprovince, Southern Victoria Land, Antarctica - PhD Thesis, New Mexico Institute of Mining and Technology, 460 pp.	XRF	60	0.59	14.34		6.34	0.22	0.4	0.69	5.29	3.12	0.1									7.82					Wright-Grassham, A.C., 1987. Volcanic geology, mineralogy, and petrogenesis of the Discovery Volcanic Subprovince, Southern Victoria Land, Antarctica - PhD Thesis, New Mexico Institute of Mining and Technology, 460 pp.	XRF								19
Mount Morning Volcanic Field	Mason Spur	MS5			AW83707A							Wright-Grassham, A.C., 1987. Volcanic geology, mineralogy, and petrogenesis of the Discovery Volcanic Subprovince, Southern Victoria Land, Antarctica - PhD Thesis, New Mexico Institute of Mining and Technology, 460 pp.	XRF	60.19	0.6	14.31		8.48	0.31	0.51	1.32	7.15	4.55	0.05									1.74					Wright-Grassham, A.C., 1987. Volcanic geology, mineralogy, and petrogenesis of the Discovery Volcanic Subprovince, Southern Victoria Land, Antarctica - PhD Thesis, New Mexico Institute of Mining and Technology, 460 pp.	XRF				55						16
Mount Morning Volcanic Field	Mason Spur	MS5			AW83522							Wright-Grassham, A.C., 1987. Volcanic geology, mineralogy, and petrogenesis of the Discovery Volcanic Subprovince, Southern Victoria Land, Antarctica - PhD Thesis, New Mexico Institute of Mining and Technology, 460 pp.	XRF	60.47	0.52	15.26		7.98	0.17	0.55	1.56	5.73	5.03	0.07									1.7					Wright-Grassham, A.C., 1987. Volcanic geology, mineralogy, and petrogenesis of the Discovery Volcanic Subprovince, Southern Victoria Land, Antarctica - PhD Thesis, New Mexico Institute of Mining and Technology, 460 pp.	XRF				166
Mount Morning Volcanic Field	Mason Spur	MS5			AW83533							Wright-Grassham, A.C., 1987. Volcanic geology, mineralogy, and petrogenesis of the Discovery Volcanic Subprovince, Southern Victoria Land, Antarctica - PhD Thesis, New Mexico Institute of Mining and Technology, 460 pp.	XRF	60.52	0.27	17.86		4.62	0.2	0.22	1.12	7.65	5.58	0.05									1.05		INAA	4.61		Wright-Grassham, A.C., 1987. Volcanic geology, mineralogy, and petrogenesis of the Discovery Volcanic Subprovince, Southern Victoria Land, Antarctica - PhD Thesis, New Mexico Institute of Mining and Technology, 460 pp.	XRF				44		240		16	1.98
Mount Morning Volcanic Field	Mason Spur	MS5			AW83559							Wright-Grassham, A.C., 1987. Volcanic geology, mineralogy, and petrogenesis of the Discovery Volcanic Subprovince, Southern Victoria Land, Antarctica - PhD Thesis, New Mexico Institute of Mining and Technology, 460 pp.	XRF	60.59	0.5	15.3		7.64	0.13	0.37	1.34	6.35	4.98	0.07									2.09					Wright-Grassham, A.C., 1987. Volcanic geology, mineralogy, and petrogenesis of the Discovery Volcanic Subprovince, Southern Victoria Land, Antarctica - PhD Thesis, New Mexico Institute of Mining and Technology, 460 pp.	XRF				67
Mount Morning Volcanic Field	Mason Spur	MS5			AW83520							Wright-Grassham, A.C., 1987. Volcanic geology, mineralogy, and petrogenesis of the Discovery Volcanic Subprovince, Southern Victoria Land, Antarctica - PhD Thesis, New Mexico Institute of Mining and Technology, 460 pp.	XRF	60.76	0.52	15.84		6.6	0.26	0.41	1.28	6.84	5	0.08									1.32					Wright-Grassham, A.C., 1987. Volcanic geology, mineralogy, and petrogenesis of the Discovery Volcanic Subprovince, Southern Victoria Land, Antarctica - PhD Thesis, New Mexico Institute of Mining and Technology, 460 pp.	XRF				261
Mount Morning Volcanic Field	Mason Spur	MS5			AW83642							Wright-Grassham, A.C., 1987. Volcanic geology, mineralogy, and petrogenesis of the Discovery Volcanic Subprovince, Southern Victoria Land, Antarctica - PhD Thesis, New Mexico Institute of Mining and Technology, 460 pp.	XRF	60.85	0.59	14.22		7.56	0.38	0.29	0.85	9.07	4.71	0.09									-0.37					Wright-Grassham, A.C., 1987. Volcanic geology, mineralogy, and petrogenesis of the Discovery Volcanic Subprovince, Southern Victoria Land, Antarctica - PhD Thesis, New Mexico Institute of Mining and Technology, 460 pp.	XRF				28				13
Mount Morning Volcanic Field	Mason Spur	MS5			AW83519							Wright-Grassham, A.C., 1987. Volcanic geology, mineralogy, and petrogenesis of the Discovery Volcanic Subprovince, Southern Victoria Land, Antarctica - PhD Thesis, New Mexico Institute of Mining and Technology, 460 pp.	XRF	61.3	0.56	15.93		6.53	0.29	0.33	1.3	7.93	5.04	0.1									-0.54					Wright-Grassham, A.C., 1987. Volcanic geology, mineralogy, and petrogenesis of the Discovery Volcanic Subprovince, Southern Victoria Land, Antarctica - PhD Thesis, New Mexico Institute of Mining and Technology, 460 pp.	XRF				420				17
Mount Morning Volcanic Field	Mason Spur	MS5			AW83677							Wright-Grassham, A.C., 1987. Volcanic geology, mineralogy, and petrogenesis of the Discovery Volcanic Subprovince, Southern Victoria Land, Antarctica - PhD Thesis, New Mexico Institute of Mining and Technology, 460 pp.	XRF	61.4	0.59	14.28		7.75	0.37	0.45	0.88	7.18	4.8	0.07									1.36					Wright-Grassham, A.C., 1987. Volcanic geology, mineralogy, and petrogenesis of the Discovery Volcanic Subprovince, Southern Victoria Land, Antarctica - PhD Thesis, New Mexico Institute of Mining and Technology, 460 pp.	XRF				24
Mount Morning Volcanic Field	Mason Spur	MS5			AW83653		11.4	0.2				Wright-Grassham, A.C., 1987. Volcanic geology, mineralogy, and petrogenesis of the Discovery Volcanic Subprovince, Southern Victoria Land, Antarctica - PhD Thesis, New Mexico Institute of Mining and Technology, 460 pp.	XRF	61.6	0.61	14.44		7.88	0.24	0.35	0.89	7.12	4.93	0.03									1.41		INAA	7.91		Wright-Grassham, A.C., 1987. Volcanic geology, mineralogy, and petrogenesis of the Discovery Volcanic Subprovince, Southern Victoria Land, Antarctica - PhD Thesis, New Mexico Institute of Mining and Technology, 460 pp.	XRF				21		303			0.68
Mount Morning Volcanic Field	Mason Spur	MS5			AW83524							Wright-Grassham, A.C., 1987. Volcanic geology, mineralogy, and petrogenesis of the Discovery Volcanic Subprovince, Southern Victoria Land, Antarctica - PhD Thesis, New Mexico Institute of Mining and Technology, 460 pp.	XRF	61.72	0.55	15.68		6.58	0.29	0.43	1.19	6.72	5.29	0.12									1.05		INAA	6.65		Wright-Grassham, A.C., 1987. Volcanic geology, mineralogy, and petrogenesis of the Discovery Volcanic Subprovince, Southern Victoria Land, Antarctica - PhD Thesis, New Mexico Institute of Mining and Technology, 460 pp.	XRF				438		189		17	2.12
Mount Morning Volcanic Field	Mason Spur	MS5			AW83517							Wright-Grassham, A.C., 1987. Volcanic geology, mineralogy, and petrogenesis of the Discovery Volcanic Subprovince, Southern Victoria Land, Antarctica - PhD Thesis, New Mexico Institute of Mining and Technology, 460 pp.	XRF	61.96	0.58	15.56		6.51	0.23	0.39	1.01	6.92	5.03	0.06									0.75					Wright-Grassham, A.C., 1987. Volcanic geology, mineralogy, and petrogenesis of the Discovery Volcanic Subprovince, Southern Victoria Land, Antarctica - PhD Thesis, New Mexico Institute of Mining and Technology, 460 pp.	XRF				91
Mount Morning Volcanic Field	Mason Spur	MS5			AW83534							Wright-Grassham, A.C., 1987. Volcanic geology, mineralogy, and petrogenesis of the Discovery Volcanic Subprovince, Southern Victoria Land, Antarctica - PhD Thesis, New Mexico Institute of Mining and Technology, 460 pp.	XRF	62.55	0.68	15.03		6.28	0.29	0.49	0.87	6.84	5.01	0.09									1					Wright-Grassham, A.C., 1987. Volcanic geology, mineralogy, and petrogenesis of the Discovery Volcanic Subprovince, Southern Victoria Land, Antarctica - PhD Thesis, New Mexico Institute of Mining and Technology, 460 pp.	XRF				80
Mount Morning Volcanic Field	Mason Spur	MS7			AW83550							Wright-Grassham, A.C., 1987. Volcanic geology, mineralogy, and petrogenesis of the Discovery Volcanic Subprovince, Southern Victoria Land, Antarctica - PhD Thesis, New Mexico Institute of Mining and Technology, 460 pp.	XRF	42.48	3.3	15.87		10.37	0.18	4.86	10.73	3.43	1.1	1.2									5.23					Wright-Grassham, A.C., 1987. Volcanic geology, mineralogy, and petrogenesis of the Discovery Volcanic Subprovince, Southern Victoria Land, Antarctica - PhD Thesis, New Mexico Institute of Mining and Technology, 460 pp.	XRF				1008				42		24
Mount Morning Volcanic Field	Mason Spur	MS7			AW83454							Wright-Grassham, A.C., 1987. Volcanic geology, mineralogy, and petrogenesis of the Discovery Volcanic Subprovince, Southern Victoria Land, Antarctica - PhD Thesis, New Mexico Institute of Mining and Technology, 460 pp.	XRF	42.95	2.92	15.2		10.47	0.17	7.88	12.39	2.63	0.98	0.42									2.73					Wright-Grassham, A.C., 1987. Volcanic geology, mineralogy, and petrogenesis of the Discovery Volcanic Subprovince, Southern Victoria Land, Antarctica - PhD Thesis, New Mexico Institute of Mining and Technology, 460 pp.	XRF				313				174		123
Mount Morning Volcanic Field	Mason Spur	MS7			AW83545							Wright-Grassham, A.C., 1987. Volcanic geology, mineralogy, and petrogenesis of the Discovery Volcanic Subprovince, Southern Victoria Land, Antarctica - PhD Thesis, New Mexico Institute of Mining and Technology, 460 pp.	XRF	44.27	2.8	14.16		11.23	0.19	8.69	12.5	2.75	1	0.48									0.14					Wright-Grassham, A.C., 1987. Volcanic geology, mineralogy, and petrogenesis of the Discovery Volcanic Subprovince, Southern Victoria Land, Antarctica - PhD Thesis, New Mexico Institute of Mining and Technology, 460 pp.	XRF				311				267		84
Mount Morning Volcanic Field	Mason Spur	MS7			AW83536							Wright-Grassham, A.C., 1987. Volcanic geology, mineralogy, and petrogenesis of the Discovery Volcanic Subprovince, Southern Victoria Land, Antarctica - PhD Thesis, New Mexico Institute of Mining and Technology, 460 pp.	XRF	44.32	3.1	14.53		11.45	0.18	8.41	12.58	2.68	0.85	0.46									-0.34					Wright-Grassham, A.C., 1987. Volcanic geology, mineralogy, and petrogenesis of the Discovery Volcanic Subprovince, Southern Victoria Land, Antarctica - PhD Thesis, New Mexico Institute of Mining and Technology, 460 pp.	XRF				295				185		74
Mount Morning Volcanic Field	Mason Spur	MS7			AW83554							Wright-Grassham, A.C., 1987. Volcanic geology, mineralogy, and petrogenesis of the Discovery Volcanic Subprovince, Southern Victoria Land, Antarctica - PhD Thesis, New Mexico Institute of Mining and Technology, 460 pp.	XRF	44.46	3.53	14.76		11.23	0.2	4.5	8.61	4.01	1.68	1.44									3.53					Wright-Grassham, A.C., 1987. Volcanic geology, mineralogy, and petrogenesis of the Discovery Volcanic Subprovince, Southern Victoria Land, Antarctica - PhD Thesis, New Mexico Institute of Mining and Technology, 460 pp.	XRF				1383						19
Mount Morning Volcanic Field	Mason Spur	MS7			AW83543							Wright-Grassham, A.C., 1987. Volcanic geology, mineralogy, and petrogenesis of the Discovery Volcanic Subprovince, Southern Victoria Land, Antarctica - PhD Thesis, New Mexico Institute of Mining and Technology, 460 pp.	XRF	45.43	3.82	14.72		12.23	0.24	5.11	9.29	3.93	1.39	1.91									1.02		INAA	12.25		Wright-Grassham, A.C., 1987. Volcanic geology, mineralogy, and petrogenesis of the Discovery Volcanic Subprovince, Southern Victoria Land, Antarctica - PhD Thesis, New Mexico Institute of Mining and Technology, 460 pp.	XRF				636		144		11	0.39
Mount Morning Volcanic Field	Mason Spur	MS7			AW83410							Wright-Grassham, A.C., 1987. Volcanic geology, mineralogy, and petrogenesis of the Discovery Volcanic Subprovince, Southern Victoria Land, Antarctica - PhD Thesis, New Mexico Institute of Mining and Technology, 460 pp.	XRF	46.31	2.85	16.78		9.48	0.2	3.67	8.08	4.52	2.02	1.01									3.92					Wright-Grassham, A.C., 1987. Volcanic geology, mineralogy, and petrogenesis of the Discovery Volcanic Subprovince, Southern Victoria Land, Antarctica - PhD Thesis, New Mexico Institute of Mining and Technology, 460 pp.	XRF				569						19
Mount Morning Volcanic Field	Mason Spur	MS7			AW83607							Wright-Grassham, A.C., 1987. Volcanic geology, mineralogy, and petrogenesis of the Discovery Volcanic Subprovince, Southern Victoria Land, Antarctica - PhD Thesis, New Mexico Institute of Mining and Technology, 460 pp.	XRF	46.51	2.99	16.18		11.22	0.2	4.32	7.76	4.14	2.07	1.33									1.96					Wright-Grassham, A.C., 1987. Volcanic geology, mineralogy, and petrogenesis of the Discovery Volcanic Subprovince, Southern Victoria Land, Antarctica - PhD Thesis, New Mexico Institute of Mining and Technology, 460 pp.	XRF				704				15		41
Mount Morning Volcanic Field	Mason Spur	MS7			AW83513		12.1	0.2				Wright-Grassham, A.C., 1987. Volcanic geology, mineralogy, and petrogenesis of the Discovery Volcanic Subprovince, Southern Victoria Land, Antarctica - PhD Thesis, New Mexico Institute of Mining and Technology, 460 pp.	XRF	53.29	1.65	17.45		7.99	0.19	1.36	5.64	4.81	3.19	0.63									3.16					Wright-Grassham, A.C., 1987. Volcanic geology, mineralogy, and petrogenesis of the Discovery Volcanic Subprovince, Southern Victoria Land, Antarctica - PhD Thesis, New Mexico Institute of Mining and Technology, 460 pp.	XRF				357				14
Mount Morning Volcanic Field	Mason Spur	MS7			AW85839		11.7	0.4				Wright-Grassham, A.C., 1987. Volcanic geology, mineralogy, and petrogenesis of the Discovery Volcanic Subprovince, Southern Victoria Land, Antarctica - PhD Thesis, New Mexico Institute of Mining and Technology, 460 pp.	XRF	54.07	1.63	17.62		8.25	0.22	1.91	4.96	5.62	3.32	0.6									0.77		INAA	8.48		Wright-Grassham, A.C., 1987. Volcanic geology, mineralogy, and petrogenesis of the Discovery Volcanic Subprovince, Southern Victoria Land, Antarctica - PhD Thesis, New Mexico Institute of Mining and Technology, 460 pp.	XRF				1032		157			0.93
Mount Morning Volcanic Field	Mason Spur	MS8			AW83618							Wright-Grassham, A.C., 1987. Volcanic geology, mineralogy, and petrogenesis of the Discovery Volcanic Subprovince, Southern Victoria Land, Antarctica - PhD Thesis, New Mexico Institute of Mining and Technology, 460 pp.	XRF	57.76	0.59	17.51		7.03	0.24	0.58	2.53	6.46	4.57	0.22									0.81		INAA	7.22		Wright-Grassham, A.C., 1987. Volcanic geology, mineralogy, and petrogenesis of the Discovery Volcanic Subprovince, Southern Victoria Land, Antarctica - PhD Thesis, New Mexico Institute of Mining and Technology, 460 pp.	XRF				1557		219		15	0.37
Mount Morning Volcanic Field	Mason Spur	MS8			AW83647		6.13	0.2				Wright-Grassham, A.C., 1987. Volcanic geology, mineralogy, and petrogenesis of the Discovery Volcanic Subprovince, Southern Victoria Land, Antarctica - PhD Thesis, New Mexico Institute of Mining and Technology, 460 pp.	XRF	60.02	0.47	17.54		6.28	0.22	0.62	2.15	6.51	4.97	0.14									0.22		INAA	6.18		Wright-Grassham, A.C., 1987. Volcanic geology, mineralogy, and petrogenesis of the Discovery Volcanic Subprovince, Southern Victoria Land, Antarctica - PhD Thesis, New Mexico Institute of Mining and Technology, 460 pp.	XRF				1613		219			0.92
Mount Morning Volcanic Field	Mason Spur	MS8			AW83645							Wright-Grassham, A.C., 1987. Volcanic geology, mineralogy, and petrogenesis of the Discovery Volcanic Subprovince, Southern Victoria Land, Antarctica - PhD Thesis, New Mexico Institute of Mining and Technology, 460 pp.	XRF	60.41	0.41	17.45		5.83	0.21	0.33	1.9	6.56	5.06	0.11									0.27		INAA	6.02		Wright-Grassham, A.C., 1987. Volcanic geology, mineralogy, and petrogenesis of the Discovery Volcanic Subprovince, Southern Victoria Land, Antarctica - PhD Thesis, New Mexico Institute of Mining and Technology, 460 pp.	XRF				1532		227			0.74
Mount Morning Volcanic Field	Mason Spur	MS9			AW83471							Wright-Grassham, A.C., 1987. Volcanic geology, mineralogy, and petrogenesis of the Discovery Volcanic Subprovince, Southern Victoria Land, Antarctica - PhD Thesis, New Mexico Institute of Mining and Technology, 460 pp.	XRF	39.63	6.19	13.09		16.07	0.22	8.47	11.44	2.41	0.78	0.63									-0.91		INAA	16.38		Wright-Grassham, A.C., 1987. Volcanic geology, mineralogy, and petrogenesis of the Discovery Volcanic Subprovince, Southern Victoria Land, Antarctica - PhD Thesis, New Mexico Institute of Mining and Technology, 460 pp.	XRF				288		67.7		231	0.19	59
Mount Morning Volcanic Field	Mason Spur	MS9			AW83583							Wright-Grassham, A.C., 1987. Volcanic geology, mineralogy, and petrogenesis of the Discovery Volcanic Subprovince, Southern Victoria Land, Antarctica - PhD Thesis, New Mexico Institute of Mining and Technology, 460 pp.	XRF	41.84	3.79	13.88		12.56	0.22	9.43	11.15	3.29	1.34	1.25									-0.32		INAA	12.15		Wright-Grassham, A.C., 1987. Volcanic geology, mineralogy, and petrogenesis of the Discovery Volcanic Subprovince, Southern Victoria Land, Antarctica - PhD Thesis, New Mexico Institute of Mining and Technology, 460 pp.	XRF				471		95.6		546	0.19	64
Mount Morning Volcanic Field	Mason Spur	MS9			AW83538							Wright-Grassham, A.C., 1987. Volcanic geology, mineralogy, and petrogenesis of the Discovery Volcanic Subprovince, Southern Victoria Land, Antarctica - PhD Thesis, New Mexico Institute of Mining and Technology, 460 pp.	XRF	42.14	3.63	13.55		12.42	0.21	10.34	11.36	3.52	1.15	1.06									-0.76					Wright-Grassham, A.C., 1987. Volcanic geology, mineralogy, and petrogenesis of the Discovery Volcanic Subprovince, Southern Victoria Land, Antarctica - PhD Thesis, New Mexico Institute of Mining and Technology, 460 pp.	XRF				513				363		37
Mount Morning Volcanic Field	Mason Spur	MS9			AW83417							Wright-Grassham, A.C., 1987. Volcanic geology, mineralogy, and petrogenesis of the Discovery Volcanic Subprovince, Southern Victoria Land, Antarctica - PhD Thesis, New Mexico Institute of Mining and Technology, 460 pp.	XRF	42.5	4.78	15.19		12.89	0.21	5.12	11.58	3.56	1.57	0.87									-0.19					Wright-Grassham, A.C., 1987. Volcanic geology, mineralogy, and petrogenesis of the Discovery Volcanic Subprovince, Southern Victoria Land, Antarctica - PhD Thesis, New Mexico Institute of Mining and Technology, 460 pp.	XRF				583				34		45
Mount Morning Volcanic Field	Mason Spur	MS9			AW83480							Wright-Grassham, A.C., 1987. Volcanic geology, mineralogy, and petrogenesis of the Discovery Volcanic Subprovince, Southern Victoria Land, Antarctica - PhD Thesis, New Mexico Institute of Mining and Technology, 460 pp.	XRF	42.66	3.69	14.57		12.74	0.23	5.43	10.72	3.58	1.26	1.26									1.98					Wright-Grassham, A.C., 1987. Volcanic geology, mineralogy, and petrogenesis of the Discovery Volcanic Subprovince, Southern Victoria Land, Antarctica - PhD Thesis, New Mexico Institute of Mining and Technology, 460 pp.	XRF				351				31		24
Mount Morning Volcanic Field	Mason Spur	MS9			AW83689							Wright-Grassham, A.C., 1987. Volcanic geology, mineralogy, and petrogenesis of the Discovery Volcanic Subprovince, Southern Victoria Land, Antarctica - PhD Thesis, New Mexico Institute of Mining and Technology, 460 pp.	XRF	42.72	3.49	14.68		11.86	0.21	8.65	10.97	4.02	1.62	1.08									-0.41		INAA	12.1		Wright-Grassham, A.C., 1987. Volcanic geology, mineralogy, and petrogenesis of the Discovery Volcanic Subprovince, Southern Victoria Land, Antarctica - PhD Thesis, New Mexico Institute of Mining and Technology, 460 pp.	XRF				604		124		239	0.4	118
Mount Morning Volcanic Field	Mason Spur	MS9			AW83650							Wright-Grassham, A.C., 1987. Volcanic geology, mineralogy, and petrogenesis of the Discovery Volcanic Subprovince, Southern Victoria Land, Antarctica - PhD Thesis, New Mexico Institute of Mining and Technology, 460 pp.	XRF	42.73	3.96	14.82		12.89	0.21	7.25	11.48	3.59	1.39	0.73									-0.7					Wright-Grassham, A.C., 1987. Volcanic geology, mineralogy, and petrogenesis of the Discovery Volcanic Subprovince, Southern Victoria Land, Antarctica - PhD Thesis, New Mexico Institute of Mining and Technology, 460 pp.	XRF				452				117		39
Mount Morning Volcanic Field	Mason Spur	MS9			AW83558							Wright-Grassham, A.C., 1987. Volcanic geology, mineralogy, and petrogenesis of the Discovery Volcanic Subprovince, Southern Victoria Land, Antarctica - PhD Thesis, New Mexico Institute of Mining and Technology, 460 pp.	XRF	42.76	3.54	14.42		11.93	0.21	8.87	11.15	3.95	1.24	1.24									-0.67					Wright-Grassham, A.C., 1987. Volcanic geology, mineralogy, and petrogenesis of the Discovery Volcanic Subprovince, Southern Victoria Land, Antarctica - PhD Thesis, New Mexico Institute of Mining and Technology, 460 pp.	XRF				548				329		75
Mount Morning Volcanic Field	Mason Spur	MS9			AW83401							Wright-Grassham, A.C., 1987. Volcanic geology, mineralogy, and petrogenesis of the Discovery Volcanic Subprovince, Southern Victoria Land, Antarctica - PhD Thesis, New Mexico Institute of Mining and Technology, 460 pp.	XRF	42.8	4.5	14.29		13.24	0.25	6.23	9.97	3.68	1.41	1.22									0.16					Wright-Grassham, A.C., 1987. Volcanic geology, mineralogy, and petrogenesis of the Discovery Volcanic Subprovince, Southern Victoria Land, Antarctica - PhD Thesis, New Mexico Institute of Mining and Technology, 460 pp.	XRF				824				234		31
Mount Morning Volcanic Field	Mason Spur	MS9			AW83706							Wright-Grassham, A.C., 1987. Volcanic geology, mineralogy, and petrogenesis of the Discovery Volcanic Subprovince, Southern Victoria Land, Antarctica - PhD Thesis, New Mexico Institute of Mining and Technology, 460 pp.	XRF	42.97	4.14	14.99		13.12	0.23	7.13	10.42	3.8	1.45	1.47									-0.47					Wright-Grassham, A.C., 1987. Volcanic geology, mineralogy, and petrogenesis of the Discovery Volcanic Subprovince, Southern Victoria Land, Antarctica - PhD Thesis, New Mexico Institute of Mining and Technology, 460 pp.	XRF				644				118		18
Mount Morning Volcanic Field	Mason Spur	MS9			AW83614		4.51	0.31				Wright-Grassham, A.C., 1987. Volcanic geology, mineralogy, and petrogenesis of the Discovery Volcanic Subprovince, Southern Victoria Land, Antarctica - PhD Thesis, New Mexico Institute of Mining and Technology, 460 pp.	XRF	44.77	2.99	15.62		10.85	0.21	8.23	10.17	3.95	1.16	0.95									0.26					Wright-Grassham, A.C., 1987. Volcanic geology, mineralogy, and petrogenesis of the Discovery Volcanic Subprovince, Southern Victoria Land, Antarctica - PhD Thesis, New Mexico Institute of Mining and Technology, 460 pp.	XRF										29
Mount Morning Volcanic Field	Mason Spur	MS9			AW83662							Wright-Grassham, A.C., 1987. Volcanic geology, mineralogy, and petrogenesis of the Discovery Volcanic Subprovince, Southern Victoria Land, Antarctica - PhD Thesis, New Mexico Institute of Mining and Technology, 460 pp.	XRF	45.43	2.34	12.94		11.01	0.19	12.45	10.96	2.98	1.17	0.42									-0.51					Wright-Grassham, A.C., 1987. Volcanic geology, mineralogy, and petrogenesis of the Discovery Volcanic Subprovince, Southern Victoria Land, Antarctica - PhD Thesis, New Mexico Institute of Mining and Technology, 460 pp.	XRF				304				700		93
Mount Morning Volcanic Field	Mason Spur	MS9			AW83413							Wright-Grassham, A.C., 1987. Volcanic geology, mineralogy, and petrogenesis of the Discovery Volcanic Subprovince, Southern Victoria Land, Antarctica - PhD Thesis, New Mexico Institute of Mining and Technology, 460 pp.	XRF	46	2.89	15.6		11.14	0.23	6.49	9.49	4.61	2.1	0.84									-0.65		INAA	10.95		Wright-Grassham, A.C., 1987. Volcanic geology, mineralogy, and petrogenesis of the Discovery Volcanic Subprovince, Southern Victoria Land, Antarctica - PhD Thesis, New Mexico Institute of Mining and Technology, 460 pp.	XRF				934		142		285	0.42	27
Mount Discovery Volcanic Field	Minna Bluff	Host			MS169 Bh							Scanlan, M.K., 2008. Petrology of inclusion-rich lavas at Minna Bluff, McMurdo Sound, Antarctica: Implications for magma origin, differentiation, and eruption dynamics, Bowling Green State University, 221 pp.	XRF	52.52	1.52	18.89		7.69	0.22	2.33	5.34	7.19	3.91	0.39														Scanlan, M.K., 2008. Petrology of inclusion-rich lavas at Minna Bluff, McMurdo Sound, Antarctica: Implications for magma origin, differentiation, and eruption dynamics, Bowling Green State University, 221 pp.	XRF				569		138.23			1.16
Mount Discovery Volcanic Field	Minna Bluff	Host			MS-114							Scanlan, M.K., 2008. Petrology of inclusion-rich lavas at Minna Bluff, McMurdo Sound, Antarctica: Implications for magma origin, differentiation, and eruption dynamics, Bowling Green State University, 221 pp.	XRF	53.97	1.23	19.86		6.41	0.21	1.48	4.38	7.81	4.31	0.36														Scanlan, M.K., 2008. Petrology of inclusion-rich lavas at Minna Bluff, McMurdo Sound, Antarctica: Implications for magma origin, differentiation, and eruption dynamics, Bowling Green State University, 221 pp.	XRF				871		155.52			1.55
Mount Discovery Volcanic Field	Minna Bluff	Host			MS-113							Scanlan, M.K., 2008. Petrology of inclusion-rich lavas at Minna Bluff, McMurdo Sound, Antarctica: Implications for magma origin, differentiation, and eruption dynamics, Bowling Green State University, 221 pp.	XRF	54.85	0.9	19.79		6.16	0.21	1.28	3.5	8.09	4.97	0.25														Scanlan, M.K., 2008. Petrology of inclusion-rich lavas at Minna Bluff, McMurdo Sound, Antarctica: Implications for magma origin, differentiation, and eruption dynamics, Bowling Green State University, 221 pp.	XRF				427		145.27			1.35
Mount Discovery Volcanic Field	Minna Bluff	MB1			AW82105							Wright-Grassham, A.C., 1987. Volcanic geology, mineralogy, and petrogenesis of the Discovery Volcanic Subprovince, Southern Victoria Land, Antarctica - PhD Thesis, New Mexico Institute of Mining and Technology, 460 pp.	XRF	42.6	3.45	14.27		11.33	0.19	9.59	11.15	2.81	1.23	0.75									0.76		INAA	11.7	2.25	Wright-Grassham, A.C., 1987. Volcanic geology, mineralogy, and petrogenesis of the Discovery Volcanic Subprovince, Southern Victoria Land, Antarctica - PhD Thesis, New Mexico Institute of Mining and Technology, 460 pp.	XRF				395		95.1		343	0.19	39
Mount Discovery Volcanic Field	Minna Bluff	MB1			AW82124							Wright-Grassham, A.C., 1987. Volcanic geology, mineralogy, and petrogenesis of the Discovery Volcanic Subprovince, Southern Victoria Land, Antarctica - PhD Thesis, New Mexico Institute of Mining and Technology, 460 pp.	XRF	42.61	3.78	14.52		11.48	0.19	8.89	11.14	3.23	0.72	0.88									1.91		INAA	11.52	3.07	Wright-Grassham, A.C., 1987. Volcanic geology, mineralogy, and petrogenesis of the Discovery Volcanic Subprovince, Southern Victoria Land, Antarctica - PhD Thesis, New Mexico Institute of Mining and Technology, 460 pp.	XRF				397		112		303	0.26	33
Mount Discovery Volcanic Field	Minna Bluff	MB1			AW84797							Wright-Grassham, A.C., 1987. Volcanic geology, mineralogy, and petrogenesis of the Discovery Volcanic Subprovince, Southern Victoria Land, Antarctica - PhD Thesis, New Mexico Institute of Mining and Technology, 460 pp.	XRF	43.13	3.24	15.27		10.92	0.2	7.54	10.44	3.73	1.75	0.97									1.57		INAA	11.16	3.76	Wright-Grassham, A.C., 1987. Volcanic geology, mineralogy, and petrogenesis of the Discovery Volcanic Subprovince, Southern Victoria Land, Antarctica - PhD Thesis, New Mexico Institute of Mining and Technology, 460 pp.	XRF				632		124		213	0.54	46
Mount Discovery Volcanic Field	Minna Bluff	MB1			AW82059							Wright-Grassham, A.C., 1987. Volcanic geology, mineralogy, and petrogenesis of the Discovery Volcanic Subprovince, Southern Victoria Land, Antarctica - PhD Thesis, New Mexico Institute of Mining and Technology, 460 pp.	XRF	43.23	3.31	15.33		10.97	0.2	7.47	10.84	3.95	1.65	0.98									1.64		INAA	11.19	3.7	Wright-Grassham, A.C., 1987. Volcanic geology, mineralogy, and petrogenesis of the Discovery Volcanic Subprovince, Southern Victoria Land, Antarctica - PhD Thesis, New Mexico Institute of Mining and Technology, 460 pp.	XRF				621		121		234	0.43	42
Mount Discovery Volcanic Field	Minna Bluff	MB1			AW82113A							Wright-Grassham, A.C., 1987. Volcanic geology, mineralogy, and petrogenesis of the Discovery Volcanic Subprovince, Southern Victoria Land, Antarctica - PhD Thesis, New Mexico Institute of Mining and Technology, 460 pp.	XRF	44.28	3.32	14.94		10.55	0.2	8.12	10.09	3.7	1.89	0.94									0.21		INAA	11.08	3.5	Wright-Grassham, A.C., 1987. Volcanic geology, mineralogy, and petrogenesis of the Discovery Volcanic Subprovince, Southern Victoria Land, Antarctica - PhD Thesis, New Mexico Institute of Mining and Technology, 460 pp.	XRF				484		127		288	0.35	33
Mount Discovery Volcanic Field	Minna Bluff	MB1			AW82140							Wright-Grassham, A.C., 1987. Volcanic geology, mineralogy, and petrogenesis of the Discovery Volcanic Subprovince, Southern Victoria Land, Antarctica - PhD Thesis, New Mexico Institute of Mining and Technology, 460 pp.	XRF	44.63	3.29	15.38		10.81	0.19	7.23	9.43	4.41	2.24	0.97									0.57		INAA	10.84	4.33	Wright-Grassham, A.C., 1987. Volcanic geology, mineralogy, and petrogenesis of the Discovery Volcanic Subprovince, Southern Victoria Land, Antarctica - PhD Thesis, New Mexico Institute of Mining and Technology, 460 pp.	XRF				770		137		179	0.68	35
Mount Discovery Volcanic Field	Minna Bluff	MB1			AW82296		9.01	0.23				Wright-Grassham, A.C., 1987. Volcanic geology, mineralogy, and petrogenesis of the Discovery Volcanic Subprovince, Southern Victoria Land, Antarctica - PhD Thesis, New Mexico Institute of Mining and Technology, 460 pp.	XRF	45.51	2.76	15.78		9.86	0.19	6.63	9.1	4.49	2.12	0.78									1.75		INAA	10.15	4.22	Wright-Grassham, A.C., 1987. Volcanic geology, mineralogy, and petrogenesis of the Discovery Volcanic Subprovince, Southern Victoria Land, Antarctica - PhD Thesis, New Mexico Institute of Mining and Technology, 460 pp.	XRF				670		130		251	0.64	38
Mount Discovery Volcanic Field	Minna Bluff	MB1			AW82103							Wright-Grassham, A.C., 1987. Volcanic geology, mineralogy, and petrogenesis of the Discovery Volcanic Subprovince, Southern Victoria Land, Antarctica - PhD Thesis, New Mexico Institute of Mining and Technology, 460 pp.	XRF	45.89	2.96	17.36		10.79	0.2	4.52	8.33	3.83	2.14	1.26									2.36		INAA	10.8	3.68	Wright-Grassham, A.C., 1987. Volcanic geology, mineralogy, and petrogenesis of the Discovery Volcanic Subprovince, Southern Victoria Land, Antarctica - PhD Thesis, New Mexico Institute of Mining and Technology, 460 pp.	XRF				524		150		15	0.67	21
Mount Discovery Volcanic Field	Minna Bluff	MB1			AW82046		10.04	0.2				Wright-Grassham, A.C., 1987. Volcanic geology, mineralogy, and petrogenesis of the Discovery Volcanic Subprovince, Southern Victoria Land, Antarctica - PhD Thesis, New Mexico Institute of Mining and Technology, 460 pp.	XRF	45.94	2.81	15.71		10.03	0.2	7.08	9.25	4.52	2.15	0.72									1.15		INAA	10.12	4.39	Wright-Grassham, A.C., 1987. Volcanic geology, mineralogy, and petrogenesis of the Discovery Volcanic Subprovince, Southern Victoria Land, Antarctica - PhD Thesis, New Mexico Institute of Mining and Technology, 460 pp.	XRF				666		129		234	0.69	34
Mount Discovery Volcanic Field	Minna Bluff	MB1			AW82116							Wright-Grassham, A.C., 1987. Volcanic geology, mineralogy, and petrogenesis of the Discovery Volcanic Subprovince, Southern Victoria Land, Antarctica - PhD Thesis, New Mexico Institute of Mining and Technology, 460 pp.	XRF	46.91	3.27	17.12		11.02	0.2	4.32	8.2	4.13	1.9	1.05									1.16		INAA	11.13	3.98	Wright-Grassham, A.C., 1987. Volcanic geology, mineralogy, and petrogenesis of the Discovery Volcanic Subprovince, Southern Victoria Land, Antarctica - PhD Thesis, New Mexico Institute of Mining and Technology, 460 pp.	XRF				497		132		13	0.36	20
Mount Discovery Volcanic Field	Minna Bluff	MB1			AW82049							Wright-Grassham, A.C., 1987. Volcanic geology, mineralogy, and petrogenesis of the Discovery Volcanic Subprovince, Southern Victoria Land, Antarctica - PhD Thesis, New Mexico Institute of Mining and Technology, 460 pp.	XRF	47.02	2.5	18.01		9.39	0.25	2.98	8.02	3.91	3.12	1.02									3.2		INAA	9.35	3.92	Wright-Grassham, A.C., 1987. Volcanic geology, mineralogy, and petrogenesis of the Discovery Volcanic Subprovince, Southern Victoria Land, Antarctica - PhD Thesis, New Mexico Institute of Mining and Technology, 460 pp.	XRF				645		155		16	0.75
Mount Discovery Volcanic Field	Minna Bluff	MB1			AW84796							Wright-Grassham, A.C., 1987. Volcanic geology, mineralogy, and petrogenesis of the Discovery Volcanic Subprovince, Southern Victoria Land, Antarctica - PhD Thesis, New Mexico Institute of Mining and Technology, 460 pp.	XRF	47.49	2.4	17.59		9.4	0.22	3.56	7.9	5.36	2.86	0.76									1.69		INAA	9.4	5.05	Wright-Grassham, A.C., 1987. Volcanic geology, mineralogy, and petrogenesis of the Discovery Volcanic Subprovince, Southern Victoria Land, Antarctica - PhD Thesis, New Mexico Institute of Mining and Technology, 460 pp.	XRF				770		141		25	0.89	64
Mount Discovery Volcanic Field	Minna Bluff	MB1			AW84768							Wright-Grassham, A.C., 1987. Volcanic geology, mineralogy, and petrogenesis of the Discovery Volcanic Subprovince, Southern Victoria Land, Antarctica - PhD Thesis, New Mexico Institute of Mining and Technology, 460 pp.	XRF	47.58	2.43	17.63		9.5	0.21	3.58	7.95	4.79	2.62	0.75									1.62		INAA	9.61	4.89	Wright-Grassham, A.C., 1987. Volcanic geology, mineralogy, and petrogenesis of the Discovery Volcanic Subprovince, Southern Victoria Land, Antarctica - PhD Thesis, New Mexico Institute of Mining and Technology, 460 pp.	XRF				809		145		30	0.56	26
Mount Discovery Volcanic Field	Minna Bluff	MB1			AW82109							Wright-Grassham, A.C., 1987. Volcanic geology, mineralogy, and petrogenesis of the Discovery Volcanic Subprovince, Southern Victoria Land, Antarctica - PhD Thesis, New Mexico Institute of Mining and Technology, 460 pp.	XRF	47.81	2.8	16.85		9.94	0.22	4.61	8.13	4.25	2.46	1.03									1.42		INAA	10.14	4.11	Wright-Grassham, A.C., 1987. Volcanic geology, mineralogy, and petrogenesis of the Discovery Volcanic Subprovince, Southern Victoria Land, Antarctica - PhD Thesis, New Mexico Institute of Mining and Technology, 460 pp.	XRF				560		173		79	0.35	21
Mount Discovery Volcanic Field	Minna Bluff	MB1			AW82110							Wright-Grassham, A.C., 1987. Volcanic geology, mineralogy, and petrogenesis of the Discovery Volcanic Subprovince, Southern Victoria Land, Antarctica - PhD Thesis, New Mexico Institute of Mining and Technology, 460 pp.	XRF	48.15	2.84	16.89		10.04	0.22	3.94	8.31	4.05	2.21	1.05									0.96		INAA	10.32	3.94	Wright-Grassham, A.C., 1987. Volcanic geology, mineralogy, and petrogenesis of the Discovery Volcanic Subprovince, Southern Victoria Land, Antarctica - PhD Thesis, New Mexico Institute of Mining and Technology, 460 pp.	XRF				552		175		89	0.26
Mount Discovery Volcanic Field	Minna Bluff	MB1			AW82097B		11	1.1				Wright-Grassham, A.C., 1987. Volcanic geology, mineralogy, and petrogenesis of the Discovery Volcanic Subprovince, Southern Victoria Land, Antarctica - PhD Thesis, New Mexico Institute of Mining and Technology, 460 pp.	XRF	51.33	1.35	20.45		6.08	0.19	1.29	4.98	6.59	3.43	0.49									3.51		INAA	6.09	6.31	Wright-Grassham, A.C., 1987. Volcanic geology, mineralogy, and petrogenesis of the Discovery Volcanic Subprovince, Southern Victoria Land, Antarctica - PhD Thesis, New Mexico Institute of Mining and Technology, 460 pp.	XRF				957		162		22	1.1
Mount Discovery Volcanic Field	Minna Bluff	MB1			W84-3							Wright-Grassham, A.C., 1987. Volcanic geology, mineralogy, and petrogenesis of the Discovery Volcanic Subprovince, Southern Victoria Land, Antarctica - PhD Thesis, New Mexico Institute of Mining and Technology, 460 pp.	XRF	53.87	0.98	20.12		6.96	0.24	1.22	3.66	5.27	4.78	0.34									1.97					Wright-Grassham, A.C., 1987. Volcanic geology, mineralogy, and petrogenesis of the Discovery Volcanic Subprovince, Southern Victoria Land, Antarctica - PhD Thesis, New Mexico Institute of Mining and Technology, 460 pp.	XRF				988				27		18
Mount Discovery Volcanic Field	Minna Bluff	MB1			AW82072		9.06	0.12				Wright-Grassham, A.C., 1987. Volcanic geology, mineralogy, and petrogenesis of the Discovery Volcanic Subprovince, Southern Victoria Land, Antarctica - PhD Thesis, New Mexico Institute of Mining and Technology, 460 pp.	XRF	54.54	0.95	20.05		6.07	0.22	1.19	3.88	6.52	4.35	0.25									0.49		INAA	6.34	7.32	Wright-Grassham, A.C., 1987. Volcanic geology, mineralogy, and petrogenesis of the Discovery Volcanic Subprovince, Southern Victoria Land, Antarctica - PhD Thesis, New Mexico Institute of Mining and Technology, 460 pp.	XRF				932		172		12	0.88	bdl
Mount Discovery Volcanic Field	Minna Bluff	MB1			AW82056							Wright-Grassham, A.C., 1987. Volcanic geology, mineralogy, and petrogenesis of the Discovery Volcanic Subprovince, Southern Victoria Land, Antarctica - PhD Thesis, New Mexico Institute of Mining and Technology, 460 pp.	XRF	55.98	0.93	18.8		5.93	0.2	1.08	3.27	6.77	4.15	0.31									2.53		INAA	5.93	6.58	Wright-Grassham, A.C., 1987. Volcanic geology, mineralogy, and petrogenesis of the Discovery Volcanic Subprovince, Southern Victoria Land, Antarctica - PhD Thesis, New Mexico Institute of Mining and Technology, 460 pp.	XRF				1039		173		13	1.36	bdl
Mount Discovery Volcanic Field	Minna Bluff	MB1			AW84791							Wright-Grassham, A.C., 1987. Volcanic geology, mineralogy, and petrogenesis of the Discovery Volcanic Subprovince, Southern Victoria Land, Antarctica - PhD Thesis, New Mexico Institute of Mining and Technology, 460 pp.	XRF	57.83	0.46	18.6		5.27	0.2	0.44	2.02	7.26	4.85	0.17									1.57		INAA	5.37	7.24	Wright-Grassham, A.C., 1987. Volcanic geology, mineralogy, and petrogenesis of the Discovery Volcanic Subprovince, Southern Victoria Land, Antarctica - PhD Thesis, New Mexico Institute of Mining and Technology, 460 pp.	XRF				1141		160		bdl	0.97	35
Mount Discovery Volcanic Field	Minna Bluff	MB1			W8413-PM		10.9	0.2				Wright-Grassham, A.C., 1987. Volcanic geology, mineralogy, and petrogenesis of the Discovery Volcanic Subprovince, Southern Victoria Land, Antarctica - PhD Thesis, New Mexico Institute of Mining and Technology, 460 pp.	XRF	58.18	0.54	18.49		5.24	0.24	0.83	1.93	6.44	5.45	0.13									2.24					Wright-Grassham, A.C., 1987. Volcanic geology, mineralogy, and petrogenesis of the Discovery Volcanic Subprovince, Southern Victoria Land, Antarctica - PhD Thesis, New Mexico Institute of Mining and Technology, 460 pp.	XRF				1579				bdl		bdl
Mount Discovery Volcanic Field	Minna Bluff	MB1			W84-2							Wright-Grassham, A.C., 1987. Volcanic geology, mineralogy, and petrogenesis of the Discovery Volcanic Subprovince, Southern Victoria Land, Antarctica - PhD Thesis, New Mexico Institute of Mining and Technology, 460 pp.	XRF	58.84	0.28	18.62		4.73	0.23	0.42	1.03	6.86	5.8	0.06									2.21					Wright-Grassham, A.C., 1987. Volcanic geology, mineralogy, and petrogenesis of the Discovery Volcanic Subprovince, Southern Victoria Land, Antarctica - PhD Thesis, New Mexico Institute of Mining and Technology, 460 pp.	XRF				70				bdl		bdl
Mount Discovery Volcanic Field	Minna Bluff	MB2			AW82163		7.26	0.22				Wright-Grassham, A.C., 1987. Volcanic geology, mineralogy, and petrogenesis of the Discovery Volcanic Subprovince, Southern Victoria Land, Antarctica - PhD Thesis, New Mexico Institute of Mining and Technology, 460 pp.	XRF	44.84	3.31	15.89		10.69	0.19	6.85	10.7	3.98	1.67	0.87									-0.11		INAA	10.83	4.06	Wright-Grassham, A.C., 1987. Volcanic geology, mineralogy, and petrogenesis of the Discovery Volcanic Subprovince, Southern Victoria Land, Antarctica - PhD Thesis, New Mexico Institute of Mining and Technology, 460 pp.	XRF				526		132		205	0.64	47
Mount Discovery Volcanic Field	Minna Bluff	MB2			AW82077							Wright-Grassham, A.C., 1987. Volcanic geology, mineralogy, and petrogenesis of the Discovery Volcanic Subprovince, Southern Victoria Land, Antarctica - PhD Thesis, New Mexico Institute of Mining and Technology, 460 pp.	XRF	46.07	3.1	17.65		11.04	0.22	4.2	9.03	4.89	1.94	0.95									0.13		INAA	11.13	4.86	Wright-Grassham, A.C., 1987. Volcanic geology, mineralogy, and petrogenesis of the Discovery Volcanic Subprovince, Southern Victoria Land, Antarctica - PhD Thesis, New Mexico Institute of Mining and Technology, 460 pp.	XRF				679		150		16	0.26	24
Mount Discovery Volcanic Field	Minna Bluff	MB2			AW86887							Wright-Grassham, A.C., 1987. Volcanic geology, mineralogy, and petrogenesis of the Discovery Volcanic Subprovince, Southern Victoria Land, Antarctica - PhD Thesis, New Mexico Institute of Mining and Technology, 460 pp.	XRF	49.86	2.68	17.63		9.14	0.25	3.85	7.72	5.9	2.37	1.2									0					Wright-Grassham, A.C., 1987. Volcanic geology, mineralogy, and petrogenesis of the Discovery Volcanic Subprovince, Southern Victoria Land, Antarctica - PhD Thesis, New Mexico Institute of Mining and Technology, 460 pp.	XRF				818				bdl		bdl
Mount Discovery Volcanic Field	Minna Bluff	MB2			AW82149							Wright-Grassham, A.C., 1987. Volcanic geology, mineralogy, and petrogenesis of the Discovery Volcanic Subprovince, Southern Victoria Land, Antarctica - PhD Thesis, New Mexico Institute of Mining and Technology, 460 pp.	XRF	52.36	1.58	18.76		7.81	0.22	2.41	5.33	6.74	3.79	0.56									0.29		INAA	7.96	6.49	Wright-Grassham, A.C., 1987. Volcanic geology, mineralogy, and petrogenesis of the Discovery Volcanic Subprovince, Southern Victoria Land, Antarctica - PhD Thesis, New Mexico Institute of Mining and Technology, 460 pp.	XRF				1118		154		35	0.89	bdl
Mount Discovery Volcanic Field	Minna Bluff	MB2			AW82156							Wright-Grassham, A.C., 1987. Volcanic geology, mineralogy, and petrogenesis of the Discovery Volcanic Subprovince, Southern Victoria Land, Antarctica - PhD Thesis, New Mexico Institute of Mining and Technology, 460 pp.	XRF	52.77	1.27	19.09		7.1	0.21	2.02	4.07	7.41	4.19	0.37									0.18		INAA	7.14	7.16	Wright-Grassham, A.C., 1987. Volcanic geology, mineralogy, and petrogenesis of the Discovery Volcanic Subprovince, Southern Victoria Land, Antarctica - PhD Thesis, New Mexico Institute of Mining and Technology, 460 pp.	XRF				559		141		20	1.19	15
Mount Discovery Volcanic Field	Minna Bluff	MB2			AW82141		8.25	0.18				Wright-Grassham, A.C., 1987. Volcanic geology, mineralogy, and petrogenesis of the Discovery Volcanic Subprovince, Southern Victoria Land, Antarctica - PhD Thesis, New Mexico Institute of Mining and Technology, 460 pp.	XRF	54.15	1.09	19.4		6.51	0.23	1.59	3.84	8.01	4.34	0.33									0.16		INAA	6.55	8.11	Wright-Grassham, A.C., 1987. Volcanic geology, mineralogy, and petrogenesis of the Discovery Volcanic Subprovince, Southern Victoria Land, Antarctica - PhD Thesis, New Mexico Institute of Mining and Technology, 460 pp.	XRF				449		168		11	1.34	bdl
Mount Discovery Volcanic Field	Minna Bluff	MB2			AW84777							Wright-Grassham, A.C., 1987. Volcanic geology, mineralogy, and petrogenesis of the Discovery Volcanic Subprovince, Southern Victoria Land, Antarctica - PhD Thesis, New Mexico Institute of Mining and Technology, 460 pp.	XRF	54.6	0.86	20.06		5.98	0.21	0.98	3.41	8.31	4.02	0.26									0.1					Wright-Grassham, A.C., 1987. Volcanic geology, mineralogy, and petrogenesis of the Discovery Volcanic Subprovince, Southern Victoria Land, Antarctica - PhD Thesis, New Mexico Institute of Mining and Technology, 460 pp.	XRF				815				16		15
Mount Discovery Volcanic Field	Minna Bluff	MB2			AW82078		8.34	0.1				Wright-Grassham, A.C., 1987. Volcanic geology, mineralogy, and petrogenesis of the Discovery Volcanic Subprovince, Southern Victoria Land, Antarctica - PhD Thesis, New Mexico Institute of Mining and Technology, 460 pp.	XRF	57.03	0.5	20.3		5.03	0.2	0.71	2.19	9.36	4.53	0.12									0.42		INAA	5.07	9.14	Wright-Grassham, A.C., 1987. Volcanic geology, mineralogy, and petrogenesis of the Discovery Volcanic Subprovince, Southern Victoria Land, Antarctica - PhD Thesis, New Mexico Institute of Mining and Technology, 460 pp.	XRF				1166		160		20	1.9	21
Mount Discovery Volcanic Field	Minna Bluff	MB2			AW82150							Wright-Grassham, A.C., 1987. Volcanic geology, mineralogy, and petrogenesis of the Discovery Volcanic Subprovince, Southern Victoria Land, Antarctica - PhD Thesis, New Mexico Institute of Mining and Technology, 460 pp.	XRF	57.03	0.41	20.43		4.69	0.18	0.38	2.08	8.61	5.58	0.11									0.17		INAA	4.62	8.39	Wright-Grassham, A.C., 1987. Volcanic geology, mineralogy, and petrogenesis of the Discovery Volcanic Subprovince, Southern Victoria Land, Antarctica - PhD Thesis, New Mexico Institute of Mining and Technology, 460 pp.	XRF				761		148		17	1.1	19
Mount Discovery Volcanic Field	Minna Bluff	MB2			AW82156							Wright-Grassham, A.C., 1987. Volcanic geology, mineralogy, and petrogenesis of the Discovery Volcanic Subprovince, Southern Victoria Land, Antarctica - PhD Thesis, New Mexico Institute of Mining and Technology, 460 pp.	XRF	57.52	0.13	20.36		4.46	0.22	0.22	1.49	8.98	5.51	0.06									0.59		INAA	4.5	8.93	Wright-Grassham, A.C., 1987. Volcanic geology, mineralogy, and petrogenesis of the Discovery Volcanic Subprovince, Southern Victoria Land, Antarctica - PhD Thesis, New Mexico Institute of Mining and Technology, 460 pp.	XRF				254		192		10	1.45	bdl
Mount Discovery Volcanic Field	Minna Bluff	Type 1			MS-169 N							Scanlan, M.K., 2008. Petrology of inclusion-rich lavas at Minna Bluff, McMurdo Sound, Antarctica: Implications for magma origin, differentiation, and eruption dynamics, Bowling Green State University, 221 pp.	XRF	50.67	2.09	18.46		9.23	0.22	3.06	6.88	6.1	2.72	0.56														Scanlan, M.K., 2008. Petrology of inclusion-rich lavas at Minna Bluff, McMurdo Sound, Antarctica: Implications for magma origin, differentiation, and eruption dynamics, Bowling Green State University, 221 pp.	XRF				698		139.51			0.24
Mount Discovery Volcanic Field	Minna Bluff	Type III			MS-169 Bi							Scanlan, M.K., 2008. Petrology of inclusion-rich lavas at Minna Bluff, McMurdo Sound, Antarctica: Implications for magma origin, differentiation, and eruption dynamics, Bowling Green State University, 221 pp.	XRF	59.55	0.3	21.96		4.08	0.18	0.27	1.77	8.62	3.2	0.07														Scanlan, M.K., 2008. Petrology of inclusion-rich lavas at Minna Bluff, McMurdo Sound, Antarctica: Implications for magma origin, differentiation, and eruption dynamics, Bowling Green State University, 221 pp.	XRF				244		165.83			0.08
Mount Discovery Volcanic Field	Minna Bluff	Type V			MS-169 I							Scanlan, M.K., 2008. Petrology of inclusion-rich lavas at Minna Bluff, McMurdo Sound, Antarctica: Implications for magma origin, differentiation, and eruption dynamics, Bowling Green State University, 221 pp.	XRF	56.02	1.04	18.98		7.33	0.28	1.02	3.47	7.14	4.43	0.28														Scanlan, M.K., 2008. Petrology of inclusion-rich lavas at Minna Bluff, McMurdo Sound, Antarctica: Implications for magma origin, differentiation, and eruption dynamics, Bowling Green State University, 221 pp.	XRF				5431		180.19			0.59
Mount Discovery Volcanic Field	Minna Bluff			Phonolite	27							Goldich, S., Treves, S., Suhr, N. and Stuckless, J., 1975. Geochemistry of the Cenozoic volcanic rocks of Ross Island and vicinity, Antarctica. The Journal of Geology, 83(4): 415-435.	AAS	57.3	0.26	21.6	1.7	0.8	0.17	0.29	1.26	10	5	0.03	0.07	0.03		0.05			0.65	0.15						Goldich, S., Treves, S., Suhr, N. and Stuckless, J., 1975. Geochemistry of the Cenozoic volcanic rocks of Ross Island and vicinity, Antarctica. The Journal of Geology, 83(4): 415-435.	AAS	bdl			580	9.4	200	bdl	bdl		19
Mount Discovery Volcanic Field	Mount Discovery	MD1			AW84761							Wright-Grassham, A.C., 1987. Volcanic geology, mineralogy, and petrogenesis of the Discovery Volcanic Subprovince, Southern Victoria Land, Antarctica - PhD Thesis, New Mexico Institute of Mining and Technology, 460 pp.	XRF	49.72	2.4	17.58		8.49	0.25	3.23	6.48	6.48	2.45	1.18									0.17		INAA	8.65	6.51	Wright-Grassham, A.C., 1987. Volcanic geology, mineralogy, and petrogenesis of the Discovery Volcanic Subprovince, Southern Victoria Land, Antarctica - PhD Thesis, New Mexico Institute of Mining and Technology, 460 pp.	XRF				1642		222		bdl	0.7	29
Mount Discovery Volcanic Field	Mount Discovery	MD1			AW84718							Wright-Grassham, A.C., 1987. Volcanic geology, mineralogy, and petrogenesis of the Discovery Volcanic Subprovince, Southern Victoria Land, Antarctica - PhD Thesis, New Mexico Institute of Mining and Technology, 460 pp.	XRF	51.46	1.83	18.92		7.26	0.23	2.25	4.83	7.07	3.68	0.92									0.1		INAA	6.93	7.01	Wright-Grassham, A.C., 1987. Volcanic geology, mineralogy, and petrogenesis of the Discovery Volcanic Subprovince, Southern Victoria Land, Antarctica - PhD Thesis, New Mexico Institute of Mining and Technology, 460 pp.	XRF				1063		210		bdl	0.83	19
Mount Discovery Volcanic Field	Mount Discovery	MD1			AW86899		5.27	0.1				Wright-Grassham, A.C., 1987. Volcanic geology, mineralogy, and petrogenesis of the Discovery Volcanic Subprovince, Southern Victoria Land, Antarctica - PhD Thesis, New Mexico Institute of Mining and Technology, 460 pp.	XRF	51.92	1.83	19.25		7.19	0.23	2.19	4.92	7.24	3.55	0.93									-0.22					Wright-Grassham, A.C., 1987. Volcanic geology, mineralogy, and petrogenesis of the Discovery Volcanic Subprovince, Southern Victoria Land, Antarctica - PhD Thesis, New Mexico Institute of Mining and Technology, 460 pp.	XRF				1067				21		bdl
Mount Discovery Volcanic Field	Mount Discovery	MD1			AW48758							Wright-Grassham, A.C., 1987. Volcanic geology, mineralogy, and petrogenesis of the Discovery Volcanic Subprovince, Southern Victoria Land, Antarctica - PhD Thesis, New Mexico Institute of Mining and Technology, 460 pp.	XRF	52.46	1.63	19.41		6.77	0.22	1.91	4.55	7.18	3.72	0.8									0.01		INAA	6.8	7.04	Wright-Grassham, A.C., 1987. Volcanic geology, mineralogy, and petrogenesis of the Discovery Volcanic Subprovince, Southern Victoria Land, Antarctica - PhD Thesis, New Mexico Institute of Mining and Technology, 460 pp.	XRF				1107		215		15	0.78	24
Mount Discovery Volcanic Field	Mount Discovery	MD1			AW86950		5.46	0.16				Wright-Grassham, A.C., 1987. Volcanic geology, mineralogy, and petrogenesis of the Discovery Volcanic Subprovince, Southern Victoria Land, Antarctica - PhD Thesis, New Mexico Institute of Mining and Technology, 460 pp.	XRF	52.78	1.61	19.71		6.53	0.21	1.75	4.66	7.36	3.61	0.77									0.3					Wright-Grassham, A.C., 1987. Volcanic geology, mineralogy, and petrogenesis of the Discovery Volcanic Subprovince, Southern Victoria Land, Antarctica - PhD Thesis, New Mexico Institute of Mining and Technology, 460 pp.	XRF				1148				23		bdl
Mount Discovery Volcanic Field	Mount Discovery	MD1			AW86901							Wright-Grassham, A.C., 1987. Volcanic geology, mineralogy, and petrogenesis of the Discovery Volcanic Subprovince, Southern Victoria Land, Antarctica - PhD Thesis, New Mexico Institute of Mining and Technology, 460 pp.	XRF	54.06	1.35	20.23		5.69	0.21	1.44	4.38	7.3	3.83	0.55									0					Wright-Grassham, A.C., 1987. Volcanic geology, mineralogy, and petrogenesis of the Discovery Volcanic Subprovince, Southern Victoria Land, Antarctica - PhD Thesis, New Mexico Institute of Mining and Technology, 460 pp.	XRF				1364				24		43
Mount Discovery Volcanic Field	Mount Discovery	MD1			AW86895							Wright-Grassham, A.C., 1987. Volcanic geology, mineralogy, and petrogenesis of the Discovery Volcanic Subprovince, Southern Victoria Land, Antarctica - PhD Thesis, New Mexico Institute of Mining and Technology, 460 pp.	XRF	54.97	1.31	18.65		6.38	0.26	1.81	4.14	6.84	3.58	0.46									1.2					Wright-Grassham, A.C., 1987. Volcanic geology, mineralogy, and petrogenesis of the Discovery Volcanic Subprovince, Southern Victoria Land, Antarctica - PhD Thesis, New Mexico Institute of Mining and Technology, 460 pp.	XRF				1043				45		bdl
Mount Discovery Volcanic Field	Mount Discovery	MD1			AW84722							Wright-Grassham, A.C., 1987. Volcanic geology, mineralogy, and petrogenesis of the Discovery Volcanic Subprovince, Southern Victoria Land, Antarctica - PhD Thesis, New Mexico Institute of Mining and Technology, 460 pp.	XRF	55.4	1.13	18.58		6.28	0.26	1.21	3.76	7.27	3.59	0.39									0.1		INAA	6.29	7.16	Wright-Grassham, A.C., 1987. Volcanic geology, mineralogy, and petrogenesis of the Discovery Volcanic Subprovince, Southern Victoria Land, Antarctica - PhD Thesis, New Mexico Institute of Mining and Technology, 460 pp.	XRF				1354		238		bdl	0.92	bdl
Mount Discovery Volcanic Field	Mount Discovery	MD1			AW84756							Wright-Grassham, A.C., 1987. Volcanic geology, mineralogy, and petrogenesis of the Discovery Volcanic Subprovince, Southern Victoria Land, Antarctica - PhD Thesis, New Mexico Institute of Mining and Technology, 460 pp.	XRF	56.08	1.18	18.72		6.44	0.26	1.71	3.91	7.21	3.56	0.41									-0.08		INAA	6.44	7.19	Wright-Grassham, A.C., 1987. Volcanic geology, mineralogy, and petrogenesis of the Discovery Volcanic Subprovince, Southern Victoria Land, Antarctica - PhD Thesis, New Mexico Institute of Mining and Technology, 460 pp.	XRF				1362		235		bdl	0.87	bdl
Mount Discovery Volcanic Field	Mount Discovery	MD1			AW84721							Wright-Grassham, A.C., 1987. Volcanic geology, mineralogy, and petrogenesis of the Discovery Volcanic Subprovince, Southern Victoria Land, Antarctica - PhD Thesis, New Mexico Institute of Mining and Technology, 460 pp.	XRF	56.12	1.09	18.73		6.29	0.26	1.26	3.62	7.18	3.68	0.38									0.3		INAA	6.26	6.96	Wright-Grassham, A.C., 1987. Volcanic geology, mineralogy, and petrogenesis of the Discovery Volcanic Subprovince, Southern Victoria Land, Antarctica - PhD Thesis, New Mexico Institute of Mining and Technology, 460 pp.	XRF				1340		235		bdl	0.76	bdl
Mount Discovery Volcanic Field	Mount Discovery	MD1			AW84754							Wright-Grassham, A.C., 1987. Volcanic geology, mineralogy, and petrogenesis of the Discovery Volcanic Subprovince, Southern Victoria Land, Antarctica - PhD Thesis, New Mexico Institute of Mining and Technology, 460 pp.	XRF	56.25	0.61	19		4.42	0.23	1.08	1.9	7.37	4.84	0.21									4.01		INAA	6.95	7.54	Wright-Grassham, A.C., 1987. Volcanic geology, mineralogy, and petrogenesis of the Discovery Volcanic Subprovince, Southern Victoria Land, Antarctica - PhD Thesis, New Mexico Institute of Mining and Technology, 460 pp.	XRF				363		212		bdl	1.84	34
Mount Discovery Volcanic Field	Mount Discovery	MD1			AW86922							Wright-Grassham, A.C., 1987. Volcanic geology, mineralogy, and petrogenesis of the Discovery Volcanic Subprovince, Southern Victoria Land, Antarctica - PhD Thesis, New Mexico Institute of Mining and Technology, 460 pp.	XRF	57.43	0.7	19.44		5.3	0.23	0.8	2.33	8.3	4.65	0.24									0.46					Wright-Grassham, A.C., 1987. Volcanic geology, mineralogy, and petrogenesis of the Discovery Volcanic Subprovince, Southern Victoria Land, Antarctica - PhD Thesis, New Mexico Institute of Mining and Technology, 460 pp.	XRF				777				12		bdl
Mount Discovery Volcanic Field	Mount Discovery	MD1			AW84719							Wright-Grassham, A.C., 1987. Volcanic geology, mineralogy, and petrogenesis of the Discovery Volcanic Subprovince, Southern Victoria Land, Antarctica - PhD Thesis, New Mexico Institute of Mining and Technology, 460 pp.	XRF	57.81	0.94	18.83		5.3	0.23	1.04	2.42	6.99	4.6	0.33									0.65		INAA	5.22	6.61	Wright-Grassham, A.C., 1987. Volcanic geology, mineralogy, and petrogenesis of the Discovery Volcanic Subprovince, Southern Victoria Land, Antarctica - PhD Thesis, New Mexico Institute of Mining and Technology, 460 pp.	XRF				1078		197		bdl	1.06	bdl
Mount Discovery Volcanic Field	Mount Discovery	MD1			AW86881							Wright-Grassham, A.C., 1987. Volcanic geology, mineralogy, and petrogenesis of the Discovery Volcanic Subprovince, Southern Victoria Land, Antarctica - PhD Thesis, New Mexico Institute of Mining and Technology, 460 pp.	XRF	58.03	0.45	20.38		3.52	0.21	0.68	2.72	9.14	4.28	0.08									0.29					Wright-Grassham, A.C., 1987. Volcanic geology, mineralogy, and petrogenesis of the Discovery Volcanic Subprovince, Southern Victoria Land, Antarctica - PhD Thesis, New Mexico Institute of Mining and Technology, 460 pp.	XRF				1190				31		bdl
Mount Discovery Volcanic Field	Mount Discovery	MD1			AW86100							Wright-Grassham, A.C., 1987. Volcanic geology, mineralogy, and petrogenesis of the Discovery Volcanic Subprovince, Southern Victoria Land, Antarctica - PhD Thesis, New Mexico Institute of Mining and Technology, 460 pp.	XRF	58.55	0.34	19.6		4.37	0.26	0.46	1.45	9.21	4.92	0.09									0.22					Wright-Grassham, A.C., 1987. Volcanic geology, mineralogy, and petrogenesis of the Discovery Volcanic Subprovince, Southern Victoria Land, Antarctica - PhD Thesis, New Mexico Institute of Mining and Technology, 460 pp.	XRF				697				67		bdl
Mount Discovery Volcanic Field	Mount Discovery	MD1			AW84745							Wright-Grassham, A.C., 1987. Volcanic geology, mineralogy, and petrogenesis of the Discovery Volcanic Subprovince, Southern Victoria Land, Antarctica - PhD Thesis, New Mexico Institute of Mining and Technology, 460 pp.	XRF	58.63	0.28	18.43		4.54	0.28	0.31	0.87	8.97	5.26	0.06									0.82		INAA	4.55	8.3	Wright-Grassham, A.C., 1987. Volcanic geology, mineralogy, and petrogenesis of the Discovery Volcanic Subprovince, Southern Victoria Land, Antarctica - PhD Thesis, New Mexico Institute of Mining and Technology, 460 pp.	XRF				37		297		bdl	1.57	bdl
Mount Discovery Volcanic Field	Mount Discovery	MD1			AW83438							Wright-Grassham, A.C., 1987. Volcanic geology, mineralogy, and petrogenesis of the Discovery Volcanic Subprovince, Southern Victoria Land, Antarctica - PhD Thesis, New Mexico Institute of Mining and Technology, 460 pp.	XRF	58.81	0.44	19.47		4.48	0.24	0.41	1.96	8.31	4.6	0.11									0.73					Wright-Grassham, A.C., 1987. Volcanic geology, mineralogy, and petrogenesis of the Discovery Volcanic Subprovince, Southern Victoria Land, Antarctica - PhD Thesis, New Mexico Institute of Mining and Technology, 460 pp.	XRF				1319				17		bdl
Mount Discovery Volcanic Field	Mount Discovery	MD1			AW84741							Wright-Grassham, A.C., 1987. Volcanic geology, mineralogy, and petrogenesis of the Discovery Volcanic Subprovince, Southern Victoria Land, Antarctica - PhD Thesis, New Mexico Institute of Mining and Technology, 460 pp.	XRF	58.92	0.28	19.06		4.25	0.26	0.44	0.87	8.61	5.46	0.07									0.84		INAA	4.22	7.5	Wright-Grassham, A.C., 1987. Volcanic geology, mineralogy, and petrogenesis of the Discovery Volcanic Subprovince, Southern Victoria Land, Antarctica - PhD Thesis, New Mexico Institute of Mining and Technology, 460 pp.	XRF				112		260		bdl	1.9	bdl
Mount Discovery Volcanic Field	Mount Discovery	MD1			AW86970		5.35	0.19				Wright-Grassham, A.C., 1987. Volcanic geology, mineralogy, and petrogenesis of the Discovery Volcanic Subprovince, Southern Victoria Land, Antarctica - PhD Thesis, New Mexico Institute of Mining and Technology, 460 pp.	XRF	59	0.53	18.97		5.02	0.28	0.63	1.99	8.29	4.3	0.14									0.27					Wright-Grassham, A.C., 1987. Volcanic geology, mineralogy, and petrogenesis of the Discovery Volcanic Subprovince, Southern Victoria Land, Antarctica - PhD Thesis, New Mexico Institute of Mining and Technology, 460 pp.	XRF				1400				bdl		bdl
Mount Discovery Volcanic Field	Mount Discovery	MD1			AW84744							Wright-Grassham, A.C., 1987. Volcanic geology, mineralogy, and petrogenesis of the Discovery Volcanic Subprovince, Southern Victoria Land, Antarctica - PhD Thesis, New Mexico Institute of Mining and Technology, 460 pp.	XRF	59.7	0.32	18.07		4.49	0.27	0.25	0.87	8.5	5.28	0.06									0.39		INAA	4.56	8.46	Wright-Grassham, A.C., 1987. Volcanic geology, mineralogy, and petrogenesis of the Discovery Volcanic Subprovince, Southern Victoria Land, Antarctica - PhD Thesis, New Mexico Institute of Mining and Technology, 460 pp.	XRF				55		285		bdl	1.16	bdl
Mount Discovery Volcanic Field	Mount Discovery	MD1			AW84725							Wright-Grassham, A.C., 1987. Volcanic geology, mineralogy, and petrogenesis of the Discovery Volcanic Subprovince, Southern Victoria Land, Antarctica - PhD Thesis, New Mexico Institute of Mining and Technology, 460 pp.	XRF	59.81	0.24	18.99		4.41	0.28	0.45	0.97	8.84	5.39	0.05									0.41		INAA	4.36	8.71	Wright-Grassham, A.C., 1987. Volcanic geology, mineralogy, and petrogenesis of the Discovery Volcanic Subprovince, Southern Victoria Land, Antarctica - PhD Thesis, New Mexico Institute of Mining and Technology, 460 pp.	XRF				72		262		bdl	1.7	bdl
Mount Discovery Volcanic Field	Mount Discovery	MD1			AW84720		5.34	0.11				Wright-Grassham, A.C., 1987. Volcanic geology, mineralogy, and petrogenesis of the Discovery Volcanic Subprovince, Southern Victoria Land, Antarctica - PhD Thesis, New Mexico Institute of Mining and Technology, 460 pp.	XRF	59.81	0.54	18.92		4.3	0.23	0.93	1.46	8.21	5.08	0.15									0.09		INAA	4.29	8.07	Wright-Grassham, A.C., 1987. Volcanic geology, mineralogy, and petrogenesis of the Discovery Volcanic Subprovince, Southern Victoria Land, Antarctica - PhD Thesis, New Mexico Institute of Mining and Technology, 460 pp.	XRF				935		184		bdl	1.05	bdl
Mount Discovery Volcanic Field	Mount Discovery	MD1			AW84735							Wright-Grassham, A.C., 1987. Volcanic geology, mineralogy, and petrogenesis of the Discovery Volcanic Subprovince, Southern Victoria Land, Antarctica - PhD Thesis, New Mexico Institute of Mining and Technology, 460 pp.	XRF	59.91	0.16	18.54		4.18	0.23	0.34	0.83	8.79	5.29	0.04									0.38		INAA	4.23	9.05	Wright-Grassham, A.C., 1987. Volcanic geology, mineralogy, and petrogenesis of the Discovery Volcanic Subprovince, Southern Victoria Land, Antarctica - PhD Thesis, New Mexico Institute of Mining and Technology, 460 pp.	XRF				38		300		bdl	1.29	bdl
Mount Discovery Volcanic Field	Mount Discovery	MD1			AW86889							Wright-Grassham, A.C., 1987. Volcanic geology, mineralogy, and petrogenesis of the Discovery Volcanic Subprovince, Southern Victoria Land, Antarctica - PhD Thesis, New Mexico Institute of Mining and Technology, 460 pp.	XRF	60.52	0.32	18.96		4.51	0.27	0.44	1.34	8.43	5.21	0.07									0.58					Wright-Grassham, A.C., 1987. Volcanic geology, mineralogy, and petrogenesis of the Discovery Volcanic Subprovince, Southern Victoria Land, Antarctica - PhD Thesis, New Mexico Institute of Mining and Technology, 460 pp.	XRF				835				bdl		bdl
Mount Discovery Volcanic Field	Mount Discovery	MD1			AW86965A							Wright-Grassham, A.C., 1987. Volcanic geology, mineralogy, and petrogenesis of the Discovery Volcanic Subprovince, Southern Victoria Land, Antarctica - PhD Thesis, New Mexico Institute of Mining and Technology, 460 pp.	XRF	60.64	0.31	19.31		3.25	0.23	0.21	1	9.18	5.4	0.04									0.31					Wright-Grassham, A.C., 1987. Volcanic geology, mineralogy, and petrogenesis of the Discovery Volcanic Subprovince, Southern Victoria Land, Antarctica - PhD Thesis, New Mexico Institute of Mining and Technology, 460 pp.	XRF				186				16		bdl
Mount Discovery Volcanic Field	Mount Discovery	MD2			AW86101							Wright-Grassham, A.C., 1987. Volcanic geology, mineralogy, and petrogenesis of the Discovery Volcanic Subprovince, Southern Victoria Land, Antarctica - PhD Thesis, New Mexico Institute of Mining and Technology, 460 pp.	XRF	41.34	4.81	13.61		13.5	0.19	9.81	11.36	2.85	1	0.62									-0.63					Wright-Grassham, A.C., 1987. Volcanic geology, mineralogy, and petrogenesis of the Discovery Volcanic Subprovince, Southern Victoria Land, Antarctica - PhD Thesis, New Mexico Institute of Mining and Technology, 460 pp.	XRF				372				339		70
Mount Discovery Volcanic Field	Mount Discovery	MD2			AW84733							Wright-Grassham, A.C., 1987. Volcanic geology, mineralogy, and petrogenesis of the Discovery Volcanic Subprovince, Southern Victoria Land, Antarctica - PhD Thesis, New Mexico Institute of Mining and Technology, 460 pp.	XRF	42.16	4.53	14.67		12.85	0.2	8.05	11.5	3.15	1.23	0.98									-0.5		INAA	13.01	3.08	Wright-Grassham, A.C., 1987. Volcanic geology, mineralogy, and petrogenesis of the Discovery Volcanic Subprovince, Southern Victoria Land, Antarctica - PhD Thesis, New Mexico Institute of Mining and Technology, 460 pp.	XRF				411		111		199	0.2	55
Mount Discovery Volcanic Field	Mount Discovery	MD2			AW84723							Wright-Grassham, A.C., 1987. Volcanic geology, mineralogy, and petrogenesis of the Discovery Volcanic Subprovince, Southern Victoria Land, Antarctica - PhD Thesis, New Mexico Institute of Mining and Technology, 460 pp.	XRF	42.55	3.98	14.15		12.58	0.21	7.93	10.64	4.09	1.56	0.87									0.09		INAA	12.85	3.61	Wright-Grassham, A.C., 1987. Volcanic geology, mineralogy, and petrogenesis of the Discovery Volcanic Subprovince, Southern Victoria Land, Antarctica - PhD Thesis, New Mexico Institute of Mining and Technology, 460 pp.	XRF				504		142		184	0.42	44
Mount Discovery Volcanic Field	Mount Discovery	MD2			AW84740							Wright-Grassham, A.C., 1987. Volcanic geology, mineralogy, and petrogenesis of the Discovery Volcanic Subprovince, Southern Victoria Land, Antarctica - PhD Thesis, New Mexico Institute of Mining and Technology, 460 pp.	XRF	42.82	3.96	14.32		12.07	0.21	8.73	11	4.1	1.37	1									-0.48		INAA	12.27	3.79	Wright-Grassham, A.C., 1987. Volcanic geology, mineralogy, and petrogenesis of the Discovery Volcanic Subprovince, Southern Victoria Land, Antarctica - PhD Thesis, New Mexico Institute of Mining and Technology, 460 pp.	XRF				509		146		210	0.25	72
Mount Discovery Volcanic Field	Mount Discovery	MD2			AW84738							Wright-Grassham, A.C., 1987. Volcanic geology, mineralogy, and petrogenesis of the Discovery Volcanic Subprovince, Southern Victoria Land, Antarctica - PhD Thesis, New Mexico Institute of Mining and Technology, 460 pp.	XRF	42.93	3.92	14.38		11.29	0.19	9.74	11.05	3.71	1.36	0.78									-0.47		INAA	11.44	3.29	Wright-Grassham, A.C., 1987. Volcanic geology, mineralogy, and petrogenesis of the Discovery Volcanic Subprovince, Southern Victoria Land, Antarctica - PhD Thesis, New Mexico Institute of Mining and Technology, 460 pp.	XRF				513		119		321	0.06	43
Mount Discovery Volcanic Field	Mount Discovery	MD2			AW84728							Wright-Grassham, A.C., 1987. Volcanic geology, mineralogy, and petrogenesis of the Discovery Volcanic Subprovince, Southern Victoria Land, Antarctica - PhD Thesis, New Mexico Institute of Mining and Technology, 460 pp.	XRF	42.94	3.96	14.28		12.65	0.22	7.81	10.63	4.18	1.81	0.89									-0.6		INAA	12.9	3.96	Wright-Grassham, A.C., 1987. Volcanic geology, mineralogy, and petrogenesis of the Discovery Volcanic Subprovince, Southern Victoria Land, Antarctica - PhD Thesis, New Mexico Institute of Mining and Technology, 460 pp.	XRF				517		144		181	0.38	79
Mount Discovery Volcanic Field	Mount Discovery	MD2			AW84728A							Wright-Grassham, A.C., 1987. Volcanic geology, mineralogy, and petrogenesis of the Discovery Volcanic Subprovince, Southern Victoria Land, Antarctica - PhD Thesis, New Mexico Institute of Mining and Technology, 460 pp.	XRF	43.05	3.94	14.3		12.26	0.22	7.7	10.66	4.2	1.79	0.87									-0.6					Wright-Grassham, A.C., 1987. Volcanic geology, mineralogy, and petrogenesis of the Discovery Volcanic Subprovince, Southern Victoria Land, Antarctica - PhD Thesis, New Mexico Institute of Mining and Technology, 460 pp.	XRF				511				187		45
Mount Discovery Volcanic Field	Mount Discovery	MD2			AW86944		4.45	0.26				Wright-Grassham, A.C., 1987. Volcanic geology, mineralogy, and petrogenesis of the Discovery Volcanic Subprovince, Southern Victoria Land, Antarctica - PhD Thesis, New Mexico Institute of Mining and Technology, 460 pp.	XRF	43.75	3.93	14.74		12.29	0.2	7.98	9.99	3.92	1.57	1									-0.77					Wright-Grassham, A.C., 1987. Volcanic geology, mineralogy, and petrogenesis of the Discovery Volcanic Subprovince, Southern Victoria Land, Antarctica - PhD Thesis, New Mexico Institute of Mining and Technology, 460 pp.	XRF				505				184		37
Mount Discovery Volcanic Field	Mount Discovery	MD2			AW84763							Wright-Grassham, A.C., 1987. Volcanic geology, mineralogy, and petrogenesis of the Discovery Volcanic Subprovince, Southern Victoria Land, Antarctica - PhD Thesis, New Mexico Institute of Mining and Technology, 460 pp.	XRF	43.76	3.74	14.62		12.01	0.22	7.56	10.32	4.53	1.69	0.85									-0.51		INAA	12.28	3.9	Wright-Grassham, A.C., 1987. Volcanic geology, mineralogy, and petrogenesis of the Discovery Volcanic Subprovince, Southern Victoria Land, Antarctica - PhD Thesis, New Mexico Institute of Mining and Technology, 460 pp.	XRF				525		150		168	0.39	44
Mount Discovery Volcanic Field	Mount Discovery	MD2			AW84750							Wright-Grassham, A.C., 1987. Volcanic geology, mineralogy, and petrogenesis of the Discovery Volcanic Subprovince, Southern Victoria Land, Antarctica - PhD Thesis, New Mexico Institute of Mining and Technology, 460 pp.	XRF	43.82	3.88	15.49		11.65	0.21	7.14	10.28	4.11	1.69	0.95									-0.68		INAA	11.79	3.8	Wright-Grassham, A.C., 1987. Volcanic geology, mineralogy, and petrogenesis of the Discovery Volcanic Subprovince, Southern Victoria Land, Antarctica - PhD Thesis, New Mexico Institute of Mining and Technology, 460 pp.	XRF				587		127		151	0.35	39
Mount Discovery Volcanic Field	Mount Discovery	MD2			AW86102							Wright-Grassham, A.C., 1987. Volcanic geology, mineralogy, and petrogenesis of the Discovery Volcanic Subprovince, Southern Victoria Land, Antarctica - PhD Thesis, New Mexico Institute of Mining and Technology, 460 pp.	XRF	43.93	3.87	14.8		12.1	0.21	8.44	10.55	3.22	1.48	0.82									-0.18					Wright-Grassham, A.C., 1987. Volcanic geology, mineralogy, and petrogenesis of the Discovery Volcanic Subprovince, Southern Victoria Land, Antarctica - PhD Thesis, New Mexico Institute of Mining and Technology, 460 pp.	XRF				427				283		33
Mount Discovery Volcanic Field	Mount Discovery	MD2			AW84748							Wright-Grassham, A.C., 1987. Volcanic geology, mineralogy, and petrogenesis of the Discovery Volcanic Subprovince, Southern Victoria Land, Antarctica - PhD Thesis, New Mexico Institute of Mining and Technology, 460 pp.	XRF	44.24	3.88	16		11.48	0.21	6.3	10.18	4.36	1.7	0.97									-0.39		INAA	11.62	4.2	Wright-Grassham, A.C., 1987. Volcanic geology, mineralogy, and petrogenesis of the Discovery Volcanic Subprovince, Southern Victoria Land, Antarctica - PhD Thesis, New Mexico Institute of Mining and Technology, 460 pp.	XRF				603		134		87	0.29	32
Mount Discovery Volcanic Field	Mount Discovery	MD2			AW86943							Wright-Grassham, A.C., 1987. Volcanic geology, mineralogy, and petrogenesis of the Discovery Volcanic Subprovince, Southern Victoria Land, Antarctica - PhD Thesis, New Mexico Institute of Mining and Technology, 460 pp.	XRF	44.53	3.68	15.28		11.16	0.22	7.16	9.68	4.46	1.9	0.93									-0.51					Wright-Grassham, A.C., 1987. Volcanic geology, mineralogy, and petrogenesis of the Discovery Volcanic Subprovince, Southern Victoria Land, Antarctica - PhD Thesis, New Mexico Institute of Mining and Technology, 460 pp.	XRF				693				175		54
Mount Discovery Volcanic Field	Mount Discovery	MD2			AW86909							Wright-Grassham, A.C., 1987. Volcanic geology, mineralogy, and petrogenesis of the Discovery Volcanic Subprovince, Southern Victoria Land, Antarctica - PhD Thesis, New Mexico Institute of Mining and Technology, 460 pp.	XRF	44.93	3.5	15.72		10.91	0.21	7.16	10.22	4.17	1.61	0.89									-0.21					Wright-Grassham, A.C., 1987. Volcanic geology, mineralogy, and petrogenesis of the Discovery Volcanic Subprovince, Southern Victoria Land, Antarctica - PhD Thesis, New Mexico Institute of Mining and Technology, 460 pp.	XRF				471				198		28
Mount Discovery Volcanic Field	Mount Discovery	MD2			AW84742							Wright-Grassham, A.C., 1987. Volcanic geology, mineralogy, and petrogenesis of the Discovery Volcanic Subprovince, Southern Victoria Land, Antarctica - PhD Thesis, New Mexico Institute of Mining and Technology, 460 pp.	XRF	45.67	3.36	16.87		10.58	0.22	4.71	9.45	4.64	1.98	1.48									-0.25		INAA	10.55	4.55	Wright-Grassham, A.C., 1987. Volcanic geology, mineralogy, and petrogenesis of the Discovery Volcanic Subprovince, Southern Victoria Land, Antarctica - PhD Thesis, New Mexico Institute of Mining and Technology, 460 pp.	XRF				766		180		32	0.47	36
Mount Discovery Volcanic Field	Mount Discovery	MD2			AW86891							Wright-Grassham, A.C., 1987. Volcanic geology, mineralogy, and petrogenesis of the Discovery Volcanic Subprovince, Southern Victoria Land, Antarctica - PhD Thesis, New Mexico Institute of Mining and Technology, 460 pp.	XRF	46.32	3.03	16.16		10.22	0.23	6.53	8.67	4.49	2.08	1.03									0.32					Wright-Grassham, A.C., 1987. Volcanic geology, mineralogy, and petrogenesis of the Discovery Volcanic Subprovince, Southern Victoria Land, Antarctica - PhD Thesis, New Mexico Institute of Mining and Technology, 460 pp.	XRF				624				155		35
Mount Discovery Volcanic Field	Mount Discovery	MD2			AW84749							Wright-Grassham, A.C., 1987. Volcanic geology, mineralogy, and petrogenesis of the Discovery Volcanic Subprovince, Southern Victoria Land, Antarctica - PhD Thesis, New Mexico Institute of Mining and Technology, 460 pp.	XRF	46.33	2.96	15.93		11.05	0.22	6.38	9.62	4.63	1.8	1.07									-0.64		INAA	11.12	4.45	Wright-Grassham, A.C., 1987. Volcanic geology, mineralogy, and petrogenesis of the Discovery Volcanic Subprovince, Southern Victoria Land, Antarctica - PhD Thesis, New Mexico Institute of Mining and Technology, 460 pp.	XRF				585		159		113	0.52	36
Mount Discovery Volcanic Field	Mount Discovery	MD2			AW86910							Wright-Grassham, A.C., 1987. Volcanic geology, mineralogy, and petrogenesis of the Discovery Volcanic Subprovince, Southern Victoria Land, Antarctica - PhD Thesis, New Mexico Institute of Mining and Technology, 460 pp.	XRF	46.46	3.31	17.12		10.11	0.21	4.89	9.3	4.94	1.93	1.1									-0.24					Wright-Grassham, A.C., 1987. Volcanic geology, mineralogy, and petrogenesis of the Discovery Volcanic Subprovince, Southern Victoria Land, Antarctica - PhD Thesis, New Mexico Institute of Mining and Technology, 460 pp.	XRF				832				35		26
Mount Discovery Volcanic Field	Mount Discovery	MD2			AW86898							Wright-Grassham, A.C., 1987. Volcanic geology, mineralogy, and petrogenesis of the Discovery Volcanic Subprovince, Southern Victoria Land, Antarctica - PhD Thesis, New Mexico Institute of Mining and Technology, 460 pp.	XRF	46.54	3.3	17.19		10.07	0.2	4.81	9.32	4.94	2.15	1.11									-0.48					Wright-Grassham, A.C., 1987. Volcanic geology, mineralogy, and petrogenesis of the Discovery Volcanic Subprovince, Southern Victoria Land, Antarctica - PhD Thesis, New Mexico Institute of Mining and Technology, 460 pp.	XRF				807				56		19
Mount Discovery Volcanic Field	Mount Discovery	MD2			AW84753		5.19	0.32				Wright-Grassham, A.C., 1987. Volcanic geology, mineralogy, and petrogenesis of the Discovery Volcanic Subprovince, Southern Victoria Land, Antarctica - PhD Thesis, New Mexico Institute of Mining and Technology, 460 pp.	XRF	48.46	2.76	17.69		9.78	0.26	3.66	7.96	5.45	2.21	1.39									-0.63		INAA	9.89	5.47	Wright-Grassham, A.C., 1987. Volcanic geology, mineralogy, and petrogenesis of the Discovery Volcanic Subprovince, Southern Victoria Land, Antarctica - PhD Thesis, New Mexico Institute of Mining and Technology, 460 pp.	XRF				797		223		bdl	0.45	17
Mount Discovery Volcanic Field	Mount Discovery	MD2			AW86947							Wright-Grassham, A.C., 1987. Volcanic geology, mineralogy, and petrogenesis of the Discovery Volcanic Subprovince, Southern Victoria Land, Antarctica - PhD Thesis, New Mexico Institute of Mining and Technology, 460 pp.	XRF	49.25	2.72	17.52		9.14	0.22	4.08	7.5	5.91	2.55	0.92									-1.02					Wright-Grassham, A.C., 1987. Volcanic geology, mineralogy, and petrogenesis of the Discovery Volcanic Subprovince, Southern Victoria Land, Antarctica - PhD Thesis, New Mexico Institute of Mining and Technology, 460 pp.	XRF				1018				12		bdl
Mount Discovery Volcanic Field	Mount Discovery	MD2			AW83435							Wright-Grassham, A.C., 1987. Volcanic geology, mineralogy, and petrogenesis of the Discovery Volcanic Subprovince, Southern Victoria Land, Antarctica - PhD Thesis, New Mexico Institute of Mining and Technology, 460 pp.	XRF	50.88	2.22	18.22		8.56	0.27	3	6.44	5.86	2.48	1.02									0.09					Wright-Grassham, A.C., 1987. Volcanic geology, mineralogy, and petrogenesis of the Discovery Volcanic Subprovince, Southern Victoria Land, Antarctica - PhD Thesis, New Mexico Institute of Mining and Technology, 460 pp.	XRF				897				24		bdl
Mount Discovery Volcanic Field	Mount Discovery	MD2			AW86883		1.87	0.43				Wright-Grassham, A.C., 1987. Volcanic geology, mineralogy, and petrogenesis of the Discovery Volcanic Subprovince, Southern Victoria Land, Antarctica - PhD Thesis, New Mexico Institute of Mining and Technology, 460 pp.	XRF	55.83	0.6	20.79		3.52	0.19	0.81	2.24	9.92	4.65	0.2									0.87		INAA	3.58		Wright-Grassham, A.C., 1987. Volcanic geology, mineralogy, and petrogenesis of the Discovery Volcanic Subprovince, Southern Victoria Land, Antarctica - PhD Thesis, New Mexico Institute of Mining and Technology, 460 pp.	XRF				663		229		22	2.07	bdl
Mount Discovery Volcanic Field	Mount Discovery			Phonolite	23							Goldich, S., Treves, S., Suhr, N. and Stuckless, J., 1975. Geochemistry of the Cenozoic volcanic rocks of Ross Island and vicinity, Antarctica. The Journal of Geology, 83(4): 415-435.	AAS	54	1.42	19.8	2.51	3.83	0.22	1.39	4.33	7.18	3.85	0.55	0.16	0.03		0.17			0.37	0.22						Goldich, S., Treves, S., Suhr, N. and Stuckless, J., 1975. Geochemistry of the Cenozoic volcanic rocks of Ross Island and vicinity, Antarctica. The Journal of Geology, 83(4): 415-435.	AAS	0.4			1430	4.4	210	bdl	bdl		8
Mount Morning Volcanic Field	Mount Morning	-	Riviera Ridge Lineage	Picro-basalt	OU78605	527				56.873	17.4	Martin, A.P., Cooper, A.F. and Price, R.C., 2013. Petrogenesis of Cenozoic, alkalic volcanic lineages at Mount Morning, West Antarctica and their entrained lithospheric mantle xenoliths: Lithospheric versus asthenospheric mantle sources. Geochim. Cosmochim. Acta, 122(0): 127-152.	XRF	39.825	5.835	12.907	17.04		0.21	9.64	12.035	2.337	0.867	0.682									-0.612	100.766				Martin, A.P., Cooper, A.F. and Price, R.C., 2013. Petrogenesis of Cenozoic, alkalic volcanic lineages at Mount Morning, West Antarctica and their entrained lithospheric mantle xenoliths: Lithospheric versus asthenospheric mantle sources. Geochim. Cosmochim. Acta, 122(0): 127-152.	LA-ICPMS				240.675		63.1944	67.631	381.555
Mount Morning Volcanic Field	Mount Morning	-	Riviera Ridge Lineage	Picro-basalt	OU78595	435				58.2308	16.3	Martin, A.P., Cooper, A.F. and Price, R.C., 2013. Petrogenesis of Cenozoic, alkalic volcanic lineages at Mount Morning, West Antarctica and their entrained lithospheric mantle xenoliths: Lithospheric versus asthenospheric mantle sources. Geochim. Cosmochim. Acta, 122(0): 127-152.	XRF	40.565	5.445	13.107	16.52		0.22	9.88	12.045	1.907	0.737	0.742									-0.354	100.814				Martin, A.P., Cooper, A.F. and Price, R.C., 2013. Petrogenesis of Cenozoic, alkalic volcanic lineages at Mount Morning, West Antarctica and their entrained lithospheric mantle xenoliths: Lithospheric versus asthenospheric mantle sources. Geochim. Cosmochim. Acta, 122(0): 127-152.	LA-ICPMS				287.906		74.9916	67.6127	389.502
Mount Morning Volcanic Field	Mount Morning	-	Riviera Ridge Lineage	Basanite	OU78572	283				61.3975	22.3	Martin, A.P., Cooper, A.F. and Price, R.C., 2013. Petrogenesis of Cenozoic, alkalic volcanic lineages at Mount Morning, West Antarctica and their entrained lithospheric mantle xenoliths: Lithospheric versus asthenospheric mantle sources. Geochim. Cosmochim. Acta, 122(0): 127-152.	XRF	40.965	4.735	12.957	15.79		0.21	10.14	11.525	3.087	1.037	0.812									-0.582	100.676				Martin, A.P., Cooper, A.F. and Price, R.C., 2013. Petrogenesis of Cenozoic, alkalic volcanic lineages at Mount Morning, West Antarctica and their entrained lithospheric mantle xenoliths: Lithospheric versus asthenospheric mantle sources. Geochim. Cosmochim. Acta, 122(0): 127-152.	XRF				436		84	-	340
Mount Morning Volcanic Field	Mount Morning	-	Riviera Ridge Lineage	Basanite	OU78590	418				59.4926	20.1	Martin, A.P., Cooper, A.F. and Price, R.C., 2013. Petrogenesis of Cenozoic, alkalic volcanic lineages at Mount Morning, West Antarctica and their entrained lithospheric mantle xenoliths: Lithospheric versus asthenospheric mantle sources. Geochim. Cosmochim. Acta, 122(0): 127-152.	XRF	41.155	5.015	13.427	15.7		0.22	9.31	12.065	2.427	0.997	0.812									-0.525	100.603				Martin, A.P., Cooper, A.F. and Price, R.C., 2013. Petrogenesis of Cenozoic, alkalic volcanic lineages at Mount Morning, West Antarctica and their entrained lithospheric mantle xenoliths: Lithospheric versus asthenospheric mantle sources. Geochim. Cosmochim. Acta, 122(0): 127-152.	XRF				458		89	-	359
Mount Morning Volcanic Field	Mount Morning	-	Riviera Ridge Lineage	Picro-basalt	OU78589	414	0.41	0.02	Martin, A.P., Cooper, A.F. and Dunlap, W.J., 2010. Geochronology of Mount Morning, Antarctica: Two-phase evolution of a long-lived trachyte-basanite-phonolite eruptive center. Bull. Volcanol., 72: 357-371, doi: 310.1007/s00445-00009-00319-00441.	58.3686	18.6	Martin, A.P., Cooper, A.F. and Price, R.C., 2013. Petrogenesis of Cenozoic, alkalic volcanic lineages at Mount Morning, West Antarctica and their entrained lithospheric mantle xenoliths: Lithospheric versus asthenospheric mantle sources. Geochim. Cosmochim. Acta, 122(0): 127-152.	XRF	41.18	4.68	13.57	16.41		0.21	9.87	11.49	2.17	0.71	0.97									-0.47	100.79				Martin, A.P., Cooper, A.F. and Price, R.C., 2013. Petrogenesis of Cenozoic, alkalic volcanic lineages at Mount Morning, West Antarctica and their entrained lithospheric mantle xenoliths: Lithospheric versus asthenospheric mantle sources. Geochim. Cosmochim. Acta, 122(0): 127-152.	LA-ICPMS				465.588		116.448	70.2776	199.378
Mount Morning Volcanic Field	Mount Morning	-	Riviera Ridge Lineage	Basanite	OU78571	282				60.6362	23.4	Martin, A.P., Cooper, A.F. and Price, R.C., 2013. Petrogenesis of Cenozoic, alkalic volcanic lineages at Mount Morning, West Antarctica and their entrained lithospheric mantle xenoliths: Lithospheric versus asthenospheric mantle sources. Geochim. Cosmochim. Acta, 122(0): 127-152.	XRF	41.19	4.66	13.25	15.58		0.21	9.69	11.59	3.19	1.16	0.87									-0.78	100.61				Martin, A.P., Cooper, A.F. and Price, R.C., 2013. Petrogenesis of Cenozoic, alkalic volcanic lineages at Mount Morning, West Antarctica and their entrained lithospheric mantle xenoliths: Lithospheric versus asthenospheric mantle sources. Geochim. Cosmochim. Acta, 122(0): 127-152.	XRF				536		88	-	330
Mount Morning Volcanic Field	Mount Morning	-	Riviera Ridge Lineage	Basanite	OU78596	436				59.9845	22.1	Martin, A.P., Cooper, A.F. and Price, R.C., 2013. Petrogenesis of Cenozoic, alkalic volcanic lineages at Mount Morning, West Antarctica and their entrained lithospheric mantle xenoliths: Lithospheric versus asthenospheric mantle sources. Geochim. Cosmochim. Acta, 122(0): 127-152.	XRF	41.715	4.615	13.947	15.25		0.19	9.23	11.775	2.907	0.977	0.652									-0.653	100.605				Martin, A.P., Cooper, A.F. and Price, R.C., 2013. Petrogenesis of Cenozoic, alkalic volcanic lineages at Mount Morning, West Antarctica and their entrained lithospheric mantle xenoliths: Lithospheric versus asthenospheric mantle sources. Geochim. Cosmochim. Acta, 122(0): 127-152.	XRF				372		49	-	271
Mount Morning Volcanic Field	Mount Morning	-	Riviera Ridge Lineage	Basanite	OU78551	213C				68.5343	23	Martin, A.P., Cooper, A.F. and Price, R.C., 2013. Petrogenesis of Cenozoic, alkalic volcanic lineages at Mount Morning, West Antarctica and their entrained lithospheric mantle xenoliths: Lithospheric versus asthenospheric mantle sources. Geochim. Cosmochim. Acta, 122(0): 127-152.	XRF	41.945	3.765	12.497	13.6		0.2	11.96	11.725	3.087	1.317	0.962									-0.752	100.306				Martin, A.P., Cooper, A.F. and Price, R.C., 2013. Petrogenesis of Cenozoic, alkalic volcanic lineages at Mount Morning, West Antarctica and their entrained lithospheric mantle xenoliths: Lithospheric versus asthenospheric mantle sources. Geochim. Cosmochim. Acta, 122(0): 127-152.	LA-ICPMS				383.165		12.1088	54.6619	17.5541
Mount Morning Volcanic Field	Mount Morning	-	Riviera Ridge Lineage	Basanite	OU78567	266				64.5888	26.7	Martin, A.P., Cooper, A.F. and Price, R.C., 2013. Petrogenesis of Cenozoic, alkalic volcanic lineages at Mount Morning, West Antarctica and their entrained lithospheric mantle xenoliths: Lithospheric versus asthenospheric mantle sources. Geochim. Cosmochim. Acta, 122(0): 127-152.	XRF	42.025	3.935	14.277	13.09		0.21	9.64	11.775	3.667	1.557	0.972									-0.382	100.766				Martin, A.P., Cooper, A.F. and Price, R.C., 2013. Petrogenesis of Cenozoic, alkalic volcanic lineages at Mount Morning, West Antarctica and their entrained lithospheric mantle xenoliths: Lithospheric versus asthenospheric mantle sources. Geochim. Cosmochim. Acta, 122(0): 127-152.	XRF				545		111	-	228
Mount Morning Volcanic Field	Mount Morning	-	Riviera Ridge Lineage	Basanite	OU78566	265	0.29	0.02	Martin, A.P., Cooper, A.F. and Dunlap, W.J., 2010. Geochronology of Mount Morning, Antarctica: Two-phase evolution of a long-lived trachyte-basanite-phonolite eruptive center. Bull. Volcanol., 72: 357-371, doi: 310.1007/s00445-00009-00319-00441.	64.4778	27	Martin, A.P., Cooper, A.F. and Price, R.C., 2013. Petrogenesis of Cenozoic, alkalic volcanic lineages at Mount Morning, West Antarctica and their entrained lithospheric mantle xenoliths: Lithospheric versus asthenospheric mantle sources. Geochim. Cosmochim. Acta, 122(0): 127-152.	XRF	42.285	3.965	14.307	13.14		0.21	9.63	11.765	3.707	1.567	0.972									-0.612	100.936				Martin, A.P., Cooper, A.F. and Price, R.C., 2013. Petrogenesis of Cenozoic, alkalic volcanic lineages at Mount Morning, West Antarctica and their entrained lithospheric mantle xenoliths: Lithospheric versus asthenospheric mantle sources. Geochim. Cosmochim. Acta, 122(0): 127-152.	LA-ICPMS				423.388		93.7455	102.359	312.375
Mount Morning Volcanic Field	Mount Morning	-	Riviera Ridge Lineage	Basanite	OU78576	287F				59.1265	26.3	Martin, A.P., Cooper, A.F. and Price, R.C., 2013. Petrogenesis of Cenozoic, alkalic volcanic lineages at Mount Morning, West Antarctica and their entrained lithospheric mantle xenoliths: Lithospheric versus asthenospheric mantle sources. Geochim. Cosmochim. Acta, 122(0): 127-152.	XRF	42.365	4.195	14.127	14.81		0.22	8.65	11.265	3.197	1.297	1.002									-0.557	100.571				Martin, A.P., Cooper, A.F. and Price, R.C., 2013. Petrogenesis of Cenozoic, alkalic volcanic lineages at Mount Morning, West Antarctica and their entrained lithospheric mantle xenoliths: Lithospheric versus asthenospheric mantle sources. Geochim. Cosmochim. Acta, 122(0): 127-152.	XRF				498		91	-	317
Mount Morning Volcanic Field	Mount Morning	-	Riviera Ridge Lineage	Basanite	OU78585	404A				63.9211	26.1	Martin, A.P., Cooper, A.F. and Price, R.C., 2013. Petrogenesis of Cenozoic, alkalic volcanic lineages at Mount Morning, West Antarctica and their entrained lithospheric mantle xenoliths: Lithospheric versus asthenospheric mantle sources. Geochim. Cosmochim. Acta, 122(0): 127-152.	XRF	42.385	3.955	14.037	13.56		0.19	9.7	11.435	3.407	1.357	0.852									-0.488	100.39				Martin, A.P., Cooper, A.F. and Price, R.C., 2013. Petrogenesis of Cenozoic, alkalic volcanic lineages at Mount Morning, West Antarctica and their entrained lithospheric mantle xenoliths: Lithospheric versus asthenospheric mantle sources. Geochim. Cosmochim. Acta, 122(0): 127-152.	XRF				376.451		88.4588	62.047	276.091
Mount Morning Volcanic Field	Mount Morning	-	Riviera Ridge Lineage	Tephrite	OU78560	252G				55.1874	23	Martin, A.P., Cooper, A.F. and Price, R.C., 2013. Petrogenesis of Cenozoic, alkalic volcanic lineages at Mount Morning, West Antarctica and their entrained lithospheric mantle xenoliths: Lithospheric versus asthenospheric mantle sources. Geochim. Cosmochim. Acta, 122(0): 127-152.	XRF	42.695	3.915	15.747	14.46		0.2	7.19	12.555	2.987	0.927	0.712									-0.482	100.906				Martin, A.P., Cooper, A.F. and Price, R.C., 2013. Petrogenesis of Cenozoic, alkalic volcanic lineages at Mount Morning, West Antarctica and their entrained lithospheric mantle xenoliths: Lithospheric versus asthenospheric mantle sources. Geochim. Cosmochim. Acta, 122(0): 127-152.	XRF				367		70	-	102
Mount Morning Volcanic Field	Mount Morning	-	Riviera Ridge Lineage	Basanite	OU78568	270				64.6741	25.9	Martin, A.P., Cooper, A.F. and Price, R.C., 2013. Petrogenesis of Cenozoic, alkalic volcanic lineages at Mount Morning, West Antarctica and their entrained lithospheric mantle xenoliths: Lithospheric versus asthenospheric mantle sources. Geochim. Cosmochim. Acta, 122(0): 127-152.	XRF	42.695	3.925	14.087	13.42		0.19	9.92	11.515	3.387	1.347	0.852									-0.602	100.736				Martin, A.P., Cooper, A.F. and Price, R.C., 2013. Petrogenesis of Cenozoic, alkalic volcanic lineages at Mount Morning, West Antarctica and their entrained lithospheric mantle xenoliths: Lithospheric versus asthenospheric mantle sources. Geochim. Cosmochim. Acta, 122(0): 127-152.	XRF				511		81	-	357
Mount Morning Volcanic Field	Mount Morning	-	Riviera Ridge Lineage	Basanite	OU78564	261				68.3976	22.5	Martin, A.P., Cooper, A.F. and Price, R.C., 2013. Petrogenesis of Cenozoic, alkalic volcanic lineages at Mount Morning, West Antarctica and their entrained lithospheric mantle xenoliths: Lithospheric versus asthenospheric mantle sources. Geochim. Cosmochim. Acta, 122(0): 127-152.	XRF	42.885	3.505	13.117	13.16		0.19	11.5	11.965	2.977	1.137	0.762									-0.574	100.624				Martin, A.P., Cooper, A.F. and Price, R.C., 2013. Petrogenesis of Cenozoic, alkalic volcanic lineages at Mount Morning, West Antarctica and their entrained lithospheric mantle xenoliths: Lithospheric versus asthenospheric mantle sources. Geochim. Cosmochim. Acta, 122(0): 127-152.	XRF				403		70	-	537
Mount Morning Volcanic Field	Mount Morning	-	Riviera Ridge Lineage	Basanite	OU78588	412				57.5116	27.8	Martin, A.P., Cooper, A.F. and Price, R.C., 2013. Petrogenesis of Cenozoic, alkalic volcanic lineages at Mount Morning, West Antarctica and their entrained lithospheric mantle xenoliths: Lithospheric versus asthenospheric mantle sources. Geochim. Cosmochim. Acta, 122(0): 127-152.	XRF	42.885	4.185	14.707	14.51		0.22	7.93	10.875	2.857	1.607	1.052									-0.479	100.349				Martin, A.P., Cooper, A.F. and Price, R.C., 2013. Petrogenesis of Cenozoic, alkalic volcanic lineages at Mount Morning, West Antarctica and their entrained lithospheric mantle xenoliths: Lithospheric versus asthenospheric mantle sources. Geochim. Cosmochim. Acta, 122(0): 127-152.	XRF				646		116	-	208
Mount Morning Volcanic Field	Mount Morning	-	Riviera Ridge Lineage	Basanite	OU78554	238A				69.8613	21.2	Martin, A.P., Cooper, A.F. and Price, R.C., 2013. Petrogenesis of Cenozoic, alkalic volcanic lineages at Mount Morning, West Antarctica and their entrained lithospheric mantle xenoliths: Lithospheric versus asthenospheric mantle sources. Geochim. Cosmochim. Acta, 122(0): 127-152.	XRF	42.965	3.385	12.607	12.95		0.19	12.12	12.235	2.907	0.947	0.742									-0.622	100.426				Martin, A.P., Cooper, A.F. and Price, R.C., 2013. Petrogenesis of Cenozoic, alkalic volcanic lineages at Mount Morning, West Antarctica and their entrained lithospheric mantle xenoliths: Lithospheric versus asthenospheric mantle sources. Geochim. Cosmochim. Acta, 122(0): 127-152.	LA-ICPMS				29.6356		9.87272	42.2138	236.954
Mount Morning Volcanic Field	Mount Morning	-	Riviera Ridge Lineage	Basanite	OU78575	286B				64.7991	20.9	Martin, A.P., Cooper, A.F. and Price, R.C., 2013. Petrogenesis of Cenozoic, alkalic volcanic lineages at Mount Morning, West Antarctica and their entrained lithospheric mantle xenoliths: Lithospheric versus asthenospheric mantle sources. Geochim. Cosmochim. Acta, 122(0): 127-152.	XRF	43.045	3.585	13.757	13.71		0.2	10.19	12.775	2.907	0.907	0.632									-0.742	100.966				Martin, A.P., Cooper, A.F. and Price, R.C., 2013. Petrogenesis of Cenozoic, alkalic volcanic lineages at Mount Morning, West Antarctica and their entrained lithospheric mantle xenoliths: Lithospheric versus asthenospheric mantle sources. Geochim. Cosmochim. Acta, 122(0): 127-152.	XRF				274		61	-	433
Mount Morning Volcanic Field	Mount Morning	-	Riviera Ridge Lineage	Tephrite	OU78533	22				60.6498	25.8	Martin, A.P., Cooper, A.F. and Price, R.C., 2013. Petrogenesis of Cenozoic, alkalic volcanic lineages at Mount Morning, West Antarctica and their entrained lithospheric mantle xenoliths: Lithospheric versus asthenospheric mantle sources. Geochim. Cosmochim. Acta, 122(0): 127-152.	XRF	43.145	3.775	14.137	13.45		0.2	8.37	12.155	3.297	1.247	0.692									-0.31	100.158				Martin, A.P., Cooper, A.F. and Price, R.C., 2013. Petrogenesis of Cenozoic, alkalic volcanic lineages at Mount Morning, West Antarctica and their entrained lithospheric mantle xenoliths: Lithospheric versus asthenospheric mantle sources. Geochim. Cosmochim. Acta, 122(0): 127-152.	XRF				447		74	-	348
Mount Morning Volcanic Field	Mount Morning	-	Riviera Ridge Lineage	Basanite	OU78538	62				66.5027	26.1	Martin, A.P., Cooper, A.F. and Price, R.C., 2013. Petrogenesis of Cenozoic, alkalic volcanic lineages at Mount Morning, West Antarctica and their entrained lithospheric mantle xenoliths: Lithospheric versus asthenospheric mantle sources. Geochim. Cosmochim. Acta, 122(0): 127-152.	XRF	43.155	3.445	13.327	13.86		0.21	11.11	10.665	3.237	1.327	0.752									-0.778	100.31				Martin, A.P., Cooper, A.F. and Price, R.C., 2013. Petrogenesis of Cenozoic, alkalic volcanic lineages at Mount Morning, West Antarctica and their entrained lithospheric mantle xenoliths: Lithospheric versus asthenospheric mantle sources. Geochim. Cosmochim. Acta, 122(0): 127-152.	XRF				618		95	-	450
Mount Morning Volcanic Field	Mount Morning	-	Riviera Ridge Lineage	Basanite	OU78587	411				65.9137	24.9	Martin, A.P., Cooper, A.F. and Price, R.C., 2013. Petrogenesis of Cenozoic, alkalic volcanic lineages at Mount Morning, West Antarctica and their entrained lithospheric mantle xenoliths: Lithospheric versus asthenospheric mantle sources. Geochim. Cosmochim. Acta, 122(0): 127-152.	XRF	43.175	3.525	13.277	13.41		0.2	10.47	11.665	3.107	1.297	0.832									-0.572	100.386				Martin, A.P., Cooper, A.F. and Price, R.C., 2013. Petrogenesis of Cenozoic, alkalic volcanic lineages at Mount Morning, West Antarctica and their entrained lithospheric mantle xenoliths: Lithospheric versus asthenospheric mantle sources. Geochim. Cosmochim. Acta, 122(0): 127-152.	LA-ICPMS				385.797		89.4566	61.0476	248.951
Mount Morning Volcanic Field	Mount Morning	-	Riviera Ridge Lineage	Basanite	OU78569	278B				63.1686	24.3	Martin, A.P., Cooper, A.F. and Price, R.C., 2013. Petrogenesis of Cenozoic, alkalic volcanic lineages at Mount Morning, West Antarctica and their entrained lithospheric mantle xenoliths: Lithospheric versus asthenospheric mantle sources. Geochim. Cosmochim. Acta, 122(0): 127-152.	XRF	43.205	3.665	14.067	13.82		0.19	9.57	11.985	3.337	0.927	0.702									-0.492	100.976				Martin, A.P., Cooper, A.F. and Price, R.C., 2013. Petrogenesis of Cenozoic, alkalic volcanic lineages at Mount Morning, West Antarctica and their entrained lithospheric mantle xenoliths: Lithospheric versus asthenospheric mantle sources. Geochim. Cosmochim. Acta, 122(0): 127-152.	XRF				398		77	-	434
Mount Morning Volcanic Field	Mount Morning	-	Riviera Ridge Lineage	Basanite	OU78536	45				66.4308	27	Martin, A.P., Cooper, A.F. and Price, R.C., 2013. Petrogenesis of Cenozoic, alkalic volcanic lineages at Mount Morning, West Antarctica and their entrained lithospheric mantle xenoliths: Lithospheric versus asthenospheric mantle sources. Geochim. Cosmochim. Acta, 122(0): 127-152.	XRF	43.255	3.745	13.727	14.08		0.2	11.25	9.725	3.367	1.077	0.552									-0.778	100.2				Martin, A.P., Cooper, A.F. and Price, R.C., 2013. Petrogenesis of Cenozoic, alkalic volcanic lineages at Mount Morning, West Antarctica and their entrained lithospheric mantle xenoliths: Lithospheric versus asthenospheric mantle sources. Geochim. Cosmochim. Acta, 122(0): 127-152.	XRF				361		55	-	765
Mount Morning Volcanic Field	Mount Morning	-	Riviera Ridge Lineage	Basanite	OU78597	501				66.6448	24.7	Martin, A.P., Cooper, A.F. and Price, R.C., 2013. Petrogenesis of Cenozoic, alkalic volcanic lineages at Mount Morning, West Antarctica and their entrained lithospheric mantle xenoliths: Lithospheric versus asthenospheric mantle sources. Geochim. Cosmochim. Acta, 122(0): 127-152.	XRF	43.255	3.525	13.967	13.09		0.19	10.56	11.385	3.237	1.127	0.562									-0.538	100.36				Martin, A.P., Cooper, A.F. and Price, R.C., 2013. Petrogenesis of Cenozoic, alkalic volcanic lineages at Mount Morning, West Antarctica and their entrained lithospheric mantle xenoliths: Lithospheric versus asthenospheric mantle sources. Geochim. Cosmochim. Acta, 122(0): 127-152.	XRF				334		61	-	617
Mount Morning Volcanic Field	Mount Morning	-	Riviera Ridge Lineage	Basanite	OU78604	526				66.9082	25.7	Martin, A.P., Cooper, A.F. and Price, R.C., 2013. Petrogenesis of Cenozoic, alkalic volcanic lineages at Mount Morning, West Antarctica and their entrained lithospheric mantle xenoliths: Lithospheric versus asthenospheric mantle sources. Geochim. Cosmochim. Acta, 122(0): 127-152.	XRF	43.285	3.515	13.607	13.45		0.19	10.98	11.275	3.177	1.197	0.672									-0.632	100.716				Martin, A.P., Cooper, A.F. and Price, R.C., 2013. Petrogenesis of Cenozoic, alkalic volcanic lineages at Mount Morning, West Antarctica and their entrained lithospheric mantle xenoliths: Lithospheric versus asthenospheric mantle sources. Geochim. Cosmochim. Acta, 122(0): 127-152.	XRF				398		65	-	413
Mount Morning Volcanic Field	Mount Morning	-	Riviera Ridge Lineage	Basanite	OU78509	17A				52.8247	39.3	Martin, A.P., Cooper, A.F. and Price, R.C., 2013. Petrogenesis of Cenozoic, alkalic volcanic lineages at Mount Morning, West Antarctica and their entrained lithospheric mantle xenoliths: Lithospheric versus asthenospheric mantle sources. Geochim. Cosmochim. Acta, 122(0): 127-152.	XRF	43.29	3.52	15.83	12.32		0.19	5.57	8.69	4.18	1.63	0.96									4.68	100.86				Martin, A.P., Cooper, A.F. and Price, R.C., 2013. Petrogenesis of Cenozoic, alkalic volcanic lineages at Mount Morning, West Antarctica and their entrained lithospheric mantle xenoliths: Lithospheric versus asthenospheric mantle sources. Geochim. Cosmochim. Acta, 122(0): 127-152.	XRF				5		260	-	bdl
Mount Morning Volcanic Field	Mount Morning	-	Riviera Ridge Lineage	Basanite	OU78562	259				68.0062	25.3	Martin, A.P., Cooper, A.F. and Price, R.C., 2013. Petrogenesis of Cenozoic, alkalic volcanic lineages at Mount Morning, West Antarctica and their entrained lithospheric mantle xenoliths: Lithospheric versus asthenospheric mantle sources. Geochim. Cosmochim. Acta, 122(0): 127-152.	XRF	43.505	3.135	13.577	13.12		0.2	11.26	11.315	3.347	1.317	0.632									-0.562	100.846				Martin, A.P., Cooper, A.F. and Price, R.C., 2013. Petrogenesis of Cenozoic, alkalic volcanic lineages at Mount Morning, West Antarctica and their entrained lithospheric mantle xenoliths: Lithospheric versus asthenospheric mantle sources. Geochim. Cosmochim. Acta, 122(0): 127-152.	XRF				390		79	-	553
Mount Morning Volcanic Field	Mount Morning	-	Riviera Ridge Lineage	Basanite	OU78594	433				63.1354	24.7	Martin, A.P., Cooper, A.F. and Price, R.C., 2013. Petrogenesis of Cenozoic, alkalic volcanic lineages at Mount Morning, West Antarctica and their entrained lithospheric mantle xenoliths: Lithospheric versus asthenospheric mantle sources. Geochim. Cosmochim. Acta, 122(0): 127-152.	XRF	43.705	3.445	14.427	14.1		0.2	9.75	11.275	3.167	0.937	0.552									-0.601	100.957				Martin, A.P., Cooper, A.F. and Price, R.C., 2013. Petrogenesis of Cenozoic, alkalic volcanic lineages at Mount Morning, West Antarctica and their entrained lithospheric mantle xenoliths: Lithospheric versus asthenospheric mantle sources. Geochim. Cosmochim. Acta, 122(0): 127-152.	LA-ICPMS				243.443		64.6035	63.6769	300.312
Mount Morning Volcanic Field	Mount Morning	-	Riviera Ridge Lineage	Basanite	OU78563	260				66.034	25.4	Martin, A.P., Cooper, A.F. and Price, R.C., 2013. Petrogenesis of Cenozoic, alkalic volcanic lineages at Mount Morning, West Antarctica and their entrained lithospheric mantle xenoliths: Lithospheric versus asthenospheric mantle sources. Geochim. Cosmochim. Acta, 122(0): 127-152.	XRF	43.725	3.245	14.157	13.16		0.2	10.33	11.38	3.237	1.29	0.642									-0.382	100.984				Martin, A.P., Cooper, A.F. and Price, R.C., 2013. Petrogenesis of Cenozoic, alkalic volcanic lineages at Mount Morning, West Antarctica and their entrained lithospheric mantle xenoliths: Lithospheric versus asthenospheric mantle sources. Geochim. Cosmochim. Acta, 122(0): 127-152.	XRF				424		82	-	409
Mount Morning Volcanic Field	Mount Morning	-	Riviera Ridge Lineage	Basanite	OU78531	12B	0.66	0.03	Martin, A.P., Cooper, A.F. and Dunlap, W.J., 2010. Geochronology of Mount Morning, Antarctica: Two-phase evolution of a long-lived trachyte-basanite-phonolite eruptive center. Bull. Volcanol., 72: 357-371, doi: 310.1007/s00445-00009-00319-00441.	63.1573	27.5	Martin, A.P., Cooper, A.F. and Price, R.C., 2013. Petrogenesis of Cenozoic, alkalic volcanic lineages at Mount Morning, West Antarctica and their entrained lithospheric mantle xenoliths: Lithospheric versus asthenospheric mantle sources. Geochim. Cosmochim. Acta, 122(0): 127-152.	XRF	43.83	3.725	14.547	13.74		0.2	9.51	10.355	3.377	1.047	0.582									-0.637	100.276				Martin, A.P., Cooper, A.F. and Price, R.C., 2013. Petrogenesis of Cenozoic, alkalic volcanic lineages at Mount Morning, West Antarctica and their entrained lithospheric mantle xenoliths: Lithospheric versus asthenospheric mantle sources. Geochim. Cosmochim. Acta, 122(0): 127-152.	XRF				333		63	-	351
Mount Morning Volcanic Field	Mount Morning	-	Riviera Ridge Lineage	Tephrite	OU78541	69				58.417	31.8	Martin, A.P., Cooper, A.F. and Price, R.C., 2013. Petrogenesis of Cenozoic, alkalic volcanic lineages at Mount Morning, West Antarctica and their entrained lithospheric mantle xenoliths: Lithospheric versus asthenospheric mantle sources. Geochim. Cosmochim. Acta, 122(0): 127-152.	XRF	43.855	3.205	15.727	12.87		0.2	7.3	10.375	3.747	1.437	0.662									0.888	100.266				Martin, A.P., Cooper, A.F. and Price, R.C., 2013. Petrogenesis of Cenozoic, alkalic volcanic lineages at Mount Morning, West Antarctica and their entrained lithospheric mantle xenoliths: Lithospheric versus asthenospheric mantle sources. Geochim. Cosmochim. Acta, 122(0): 127-152.	XRF				417		92	-	173
Mount Morning Volcanic Field	Mount Morning	-	Riviera Ridge Lineage	Tephrite	OU78599	513				53.6941	29.9	Martin, A.P., Cooper, A.F. and Price, R.C., 2013. Petrogenesis of Cenozoic, alkalic volcanic lineages at Mount Morning, West Antarctica and their entrained lithospheric mantle xenoliths: Lithospheric versus asthenospheric mantle sources. Geochim. Cosmochim. Acta, 122(0): 127-152.	XRF	43.865	3.865	15.607	13.67		0.21	6.4	11.675	3.657	1.427	0.822									-0.593	100.605				Martin, A.P., Cooper, A.F. and Price, R.C., 2013. Petrogenesis of Cenozoic, alkalic volcanic lineages at Mount Morning, West Antarctica and their entrained lithospheric mantle xenoliths: Lithospheric versus asthenospheric mantle sources. Geochim. Cosmochim. Acta, 122(0): 127-152.	XRF				471		88	-	104
Mount Morning Volcanic Field	Mount Morning	-	Riviera Ridge Lineage	Basanite	OU78553	226B				64.795	28.1	Martin, A.P., Cooper, A.F. and Price, R.C., 2013. Petrogenesis of Cenozoic, alkalic volcanic lineages at Mount Morning, West Antarctica and their entrained lithospheric mantle xenoliths: Lithospheric versus asthenospheric mantle sources. Geochim. Cosmochim. Acta, 122(0): 127-152.	XRF	43.875	3.545	13.897	13.08		0.2	9.72	11.235	3.497	1.477	0.752									-0.656	100.622				Martin, A.P., Cooper, A.F. and Price, R.C., 2013. Petrogenesis of Cenozoic, alkalic volcanic lineages at Mount Morning, West Antarctica and their entrained lithospheric mantle xenoliths: Lithospheric versus asthenospheric mantle sources. Geochim. Cosmochim. Acta, 122(0): 127-152.	XRF				566		83	-	348
Mount Morning Volcanic Field	Mount Morning	-	Riviera Ridge Lineage	Basanite	OU78547	105				58.4018	30.3	Martin, A.P., Cooper, A.F. and Price, R.C., 2013. Petrogenesis of Cenozoic, alkalic volcanic lineages at Mount Morning, West Antarctica and their entrained lithospheric mantle xenoliths: Lithospheric versus asthenospheric mantle sources. Geochim. Cosmochim. Acta, 122(0): 127-152.	XRF	43.985	3.765	14.687	14.06		0.18	7.97	9.695	3.237	1.027	0.722									1.365	100.693				Martin, A.P., Cooper, A.F. and Price, R.C., 2013. Petrogenesis of Cenozoic, alkalic volcanic lineages at Mount Morning, West Antarctica and their entrained lithospheric mantle xenoliths: Lithospheric versus asthenospheric mantle sources. Geochim. Cosmochim. Acta, 122(0): 127-152.	XRF				512		56	-	241
Mount Morning Volcanic Field	Mount Morning	-	Riviera Ridge Lineage	Basanite	OU78534	24				64.1037	28.1	Martin, A.P., Cooper, A.F. and Price, R.C., 2013. Petrogenesis of Cenozoic, alkalic volcanic lineages at Mount Morning, West Antarctica and their entrained lithospheric mantle xenoliths: Lithospheric versus asthenospheric mantle sources. Geochim. Cosmochim. Acta, 122(0): 127-152.	XRF	43.995	3.565	14.427	13.55		0.2	9.77	10.285	3.477	1.017	0.572									-0.708	100.15				Martin, A.P., Cooper, A.F. and Price, R.C., 2013. Petrogenesis of Cenozoic, alkalic volcanic lineages at Mount Morning, West Antarctica and their entrained lithospheric mantle xenoliths: Lithospheric versus asthenospheric mantle sources. Geochim. Cosmochim. Acta, 122(0): 127-152.	XRF				305		65	-	380
Mount Morning Volcanic Field	Mount Morning	-	Riviera Ridge Lineage	Basanite	OU78540	67E				68.2614	26.6	Martin, A.P., Cooper, A.F. and Price, R.C., 2013. Petrogenesis of Cenozoic, alkalic volcanic lineages at Mount Morning, West Antarctica and their entrained lithospheric mantle xenoliths: Lithospheric versus asthenospheric mantle sources. Geochim. Cosmochim. Acta, 122(0): 127-152.	XRF	44	2.74	13.93	12.08		0.19	10.49	11.1	3.27	1.19	0.58									1.25	100.82				Martin, A.P., Cooper, A.F. and Price, R.C., 2013. Petrogenesis of Cenozoic, alkalic volcanic lineages at Mount Morning, West Antarctica and their entrained lithospheric mantle xenoliths: Lithospheric versus asthenospheric mantle sources. Geochim. Cosmochim. Acta, 122(0): 127-152.	LA-ICPMS				319.44		77.9549	77.4424	493.61
Mount Morning Volcanic Field	Mount Morning	-	Riviera Ridge Lineage	Tephrite	OU78555	240				56.3915	27.9	Martin, A.P., Cooper, A.F. and Price, R.C., 2013. Petrogenesis of Cenozoic, alkalic volcanic lineages at Mount Morning, West Antarctica and their entrained lithospheric mantle xenoliths: Lithospheric versus asthenospheric mantle sources. Geochim. Cosmochim. Acta, 122(0): 127-152.	XRF	44.045	3.925	14.977	14.02		0.19	7.32	11.345	3.327	1.047	0.662									-0.512	100.346				Martin, A.P., Cooper, A.F. and Price, R.C., 2013. Petrogenesis of Cenozoic, alkalic volcanic lineages at Mount Morning, West Antarctica and their entrained lithospheric mantle xenoliths: Lithospheric versus asthenospheric mantle sources. Geochim. Cosmochim. Acta, 122(0): 127-152.	XRF				353		63	-	179
Mount Morning Volcanic Field	Mount Morning	-	Riviera Ridge Lineage	Tephrite	OU78570	281B				59.0559	23.7	Martin, A.P., Cooper, A.F. and Price, R.C., 2013. Petrogenesis of Cenozoic, alkalic volcanic lineages at Mount Morning, West Antarctica and their entrained lithospheric mantle xenoliths: Lithospheric versus asthenospheric mantle sources. Geochim. Cosmochim. Acta, 122(0): 127-152.	XRF	44.085	3.305	15.187	13.72		0.2	7.99	12.485	3.017	0.807	0.672									-0.58	100.888				Martin, A.P., Cooper, A.F. and Price, R.C., 2013. Petrogenesis of Cenozoic, alkalic volcanic lineages at Mount Morning, West Antarctica and their entrained lithospheric mantle xenoliths: Lithospheric versus asthenospheric mantle sources. Geochim. Cosmochim. Acta, 122(0): 127-152.	XRF				317		60	-	183
Mount Morning Volcanic Field	Mount Morning	-	Riviera Ridge Lineage	Basanite	OU78535	30				62.4967	29.3	Martin, A.P., Cooper, A.F. and Price, R.C., 2013. Petrogenesis of Cenozoic, alkalic volcanic lineages at Mount Morning, West Antarctica and their entrained lithospheric mantle xenoliths: Lithospheric versus asthenospheric mantle sources. Geochim. Cosmochim. Acta, 122(0): 127-152.	XRF	44.135	3.635	14.817	13.51		0.2	9.09	10.265	3.537	1.177	0.612									-0.693	100.285				Martin, A.P., Cooper, A.F. and Price, R.C., 2013. Petrogenesis of Cenozoic, alkalic volcanic lineages at Mount Morning, West Antarctica and their entrained lithospheric mantle xenoliths: Lithospheric versus asthenospheric mantle sources. Geochim. Cosmochim. Acta, 122(0): 127-152.	LA-ICPMS				249.624		64.0469	59.5308	287.367
Mount Morning Volcanic Field	Mount Morning	-	Riviera Ridge Lineage	Tephrite	OU78559	249	1.23	0.03	Martin, A.P., Cooper, A.F. and Dunlap, W.J., 2010. Geochronology of Mount Morning, Antarctica: Two-phase evolution of a long-lived trachyte-basanite-phonolite eruptive center. Bull. Volcanol., 72: 357-371, doi: 310.1007/s00445-00009-00319-00441.	62.0191	28.2	Martin, A.P., Cooper, A.F. and Price, R.C., 2013. Petrogenesis of Cenozoic, alkalic volcanic lineages at Mount Morning, West Antarctica and their entrained lithospheric mantle xenoliths: Lithospheric versus asthenospheric mantle sources. Geochim. Cosmochim. Acta, 122(0): 127-152.	XRF	44.195	3.545	14.737	13.12		0.21	8.65	11.385	3.637	1.117	0.672									-0.433	100.835				Martin, A.P., Cooper, A.F. and Price, R.C., 2013. Petrogenesis of Cenozoic, alkalic volcanic lineages at Mount Morning, West Antarctica and their entrained lithospheric mantle xenoliths: Lithospheric versus asthenospheric mantle sources. Geochim. Cosmochim. Acta, 122(0): 127-152.	LA-ICPMS				340.46		91.3222	64.3387	363.091
Mount Morning Volcanic Field	Mount Morning	-	Riviera Ridge Lineage	Tephrite	OU78598	512				53.475	32.1	Martin, A.P., Cooper, A.F. and Price, R.C., 2013. Petrogenesis of Cenozoic, alkalic volcanic lineages at Mount Morning, West Antarctica and their entrained lithospheric mantle xenoliths: Lithospheric versus asthenospheric mantle sources. Geochim. Cosmochim. Acta, 122(0): 127-152.	XRF	44.21	3.775	15.587	13.66		0.21	6.2	11.235	3.927	1.507	0.822									-0.559	100.574				Martin, A.P., Cooper, A.F. and Price, R.C., 2013. Petrogenesis of Cenozoic, alkalic volcanic lineages at Mount Morning, West Antarctica and their entrained lithospheric mantle xenoliths: Lithospheric versus asthenospheric mantle sources. Geochim. Cosmochim. Acta, 122(0): 127-152.	XRF				496		80	-	86
Mount Morning Volcanic Field	Mount Morning	-	Riviera Ridge Lineage	Basanite	OU78545	103				66.0429	27.4	Martin, A.P., Cooper, A.F. and Price, R.C., 2013. Petrogenesis of Cenozoic, alkalic volcanic lineages at Mount Morning, West Antarctica and their entrained lithospheric mantle xenoliths: Lithospheric versus asthenospheric mantle sources. Geochim. Cosmochim. Acta, 122(0): 127-152.	XRF	44.245	3.255	13.977	12.76		0.2	10.02	11.345	3.487	1.237	0.702									-0.663	100.565				Martin, A.P., Cooper, A.F. and Price, R.C., 2013. Petrogenesis of Cenozoic, alkalic volcanic lineages at Mount Morning, West Antarctica and their entrained lithospheric mantle xenoliths: Lithospheric versus asthenospheric mantle sources. Geochim. Cosmochim. Acta, 122(0): 127-152.	XRF				480		75	-	526
Mount Morning Volcanic Field	Mount Morning	-	Riviera Ridge Lineage	Tephrite	OU78603	521				60.5495	25.9	Martin, A.P., Cooper, A.F. and Price, R.C., 2013. Petrogenesis of Cenozoic, alkalic volcanic lineages at Mount Morning, West Antarctica and their entrained lithospheric mantle xenoliths: Lithospheric versus asthenospheric mantle sources. Geochim. Cosmochim. Acta, 122(0): 127-152.	XRF	44.275	3.595	14.607	13.2		0.2	8.18	12.265	3.187	1.117	0.712									-0.538	100.8				Martin, A.P., Cooper, A.F. and Price, R.C., 2013. Petrogenesis of Cenozoic, alkalic volcanic lineages at Mount Morning, West Antarctica and their entrained lithospheric mantle xenoliths: Lithospheric versus asthenospheric mantle sources. Geochim. Cosmochim. Acta, 122(0): 127-152.	XRF				381		69	-	383
Mount Morning Volcanic Field	Mount Morning	-	Riviera Ridge Lineage	Basanite	OU78573	284D				62.1472	30.3	Martin, A.P., Cooper, A.F. and Price, R.C., 2013. Petrogenesis of Cenozoic, alkalic volcanic lineages at Mount Morning, West Antarctica and their entrained lithospheric mantle xenoliths: Lithospheric versus asthenospheric mantle sources. Geochim. Cosmochim. Acta, 122(0): 127-152.	XRF	44.275	3.215	14.967	13.26		0.21	8.79	10.695	3.707	1.477	0.772									-0.582	100.786				Martin, A.P., Cooper, A.F. and Price, R.C., 2013. Petrogenesis of Cenozoic, alkalic volcanic lineages at Mount Morning, West Antarctica and their entrained lithospheric mantle xenoliths: Lithospheric versus asthenospheric mantle sources. Geochim. Cosmochim. Acta, 122(0): 127-152.	LA-ICPMS				335.695		83.8367	53.74	231.869
Mount Morning Volcanic Field	Mount Morning	-	Riviera Ridge Lineage	Basanite	OU78592	421				62.5415	32	Martin, A.P., Cooper, A.F. and Price, R.C., 2013. Petrogenesis of Cenozoic, alkalic volcanic lineages at Mount Morning, West Antarctica and their entrained lithospheric mantle xenoliths: Lithospheric versus asthenospheric mantle sources. Geochim. Cosmochim. Acta, 122(0): 127-152.	XRF	44.375	3.155	14.557	13.41		0.21	9.04	10.125	3.807	1.487	0.982									-0.692	100.456				Martin, A.P., Cooper, A.F. and Price, R.C., 2013. Petrogenesis of Cenozoic, alkalic volcanic lineages at Mount Morning, West Antarctica and their entrained lithospheric mantle xenoliths: Lithospheric versus asthenospheric mantle sources. Geochim. Cosmochim. Acta, 122(0): 127-152.	XRF				533		93	-	417
Mount Morning Volcanic Field	Mount Morning	-	Riviera Ridge Lineage	Tephrite	OU78552	223A				58.7561	29.9	Martin, A.P., Cooper, A.F. and Price, R.C., 2013. Petrogenesis of Cenozoic, alkalic volcanic lineages at Mount Morning, West Antarctica and their entrained lithospheric mantle xenoliths: Lithospheric versus asthenospheric mantle sources. Geochim. Cosmochim. Acta, 122(0): 127-152.	XRF	44.535	3.315	15.307	12.9		0.19	7.42	11.485	3.737	1.267	0.692									-0.282	100.566				Martin, A.P., Cooper, A.F. and Price, R.C., 2013. Petrogenesis of Cenozoic, alkalic volcanic lineages at Mount Morning, West Antarctica and their entrained lithospheric mantle xenoliths: Lithospheric versus asthenospheric mantle sources. Geochim. Cosmochim. Acta, 122(0): 127-152.	XRF				477		76	-	250
Mount Morning Volcanic Field	Mount Morning	-	Riviera Ridge Lineage	Basanite	OU78550	152				68.9443	29.9	Martin, A.P., Cooper, A.F. and Price, R.C., 2013. Petrogenesis of Cenozoic, alkalic volcanic lineages at Mount Morning, West Antarctica and their entrained lithospheric mantle xenoliths: Lithospheric versus asthenospheric mantle sources. Geochim. Cosmochim. Acta, 122(0): 127-152.	XRF	44.665	2.755	13.987	12.06		0.2	10.81	10.495	3.727	1.527	0.622									-0.455	100.393				Martin, A.P., Cooper, A.F. and Price, R.C., 2013. Petrogenesis of Cenozoic, alkalic volcanic lineages at Mount Morning, West Antarctica and their entrained lithospheric mantle xenoliths: Lithospheric versus asthenospheric mantle sources. Geochim. Cosmochim. Acta, 122(0): 127-152.	XRF				453		92	-	532
Mount Morning Volcanic Field	Mount Morning	-	Riviera Ridge Lineage	Tephrite	OU78558	246				54.4186	41.6	Martin, A.P., Cooper, A.F. and Price, R.C., 2013. Petrogenesis of Cenozoic, alkalic volcanic lineages at Mount Morning, West Antarctica and their entrained lithospheric mantle xenoliths: Lithospheric versus asthenospheric mantle sources. Geochim. Cosmochim. Acta, 122(0): 127-152.	XRF	44.715	3.815	15.427	13.68		0.24	5.77	9.355	4.757	2.167	1.172									-0.631	100.467				Martin, A.P., Cooper, A.F. and Price, R.C., 2013. Petrogenesis of Cenozoic, alkalic volcanic lineages at Mount Morning, West Antarctica and their entrained lithospheric mantle xenoliths: Lithospheric versus asthenospheric mantle sources. Geochim. Cosmochim. Acta, 122(0): 127-152.	XRF				790		153	-	78
Mount Morning Volcanic Field	Mount Morning	-	Riviera Ridge Lineage	Tephrite	OU78602	520	3.07	0.08	Martin, A.P., Cooper, A.F. and Dunlap, W.J., 2010. Geochronology of Mount Morning, Antarctica: Two-phase evolution of a long-lived trachyte-basanite-phonolite eruptive center. Bull. Volcanol., 72: 357-371, doi: 310.1007/s00445-00009-00319-00441.	52.9108	39.5	Martin, A.P., Cooper, A.F. and Price, R.C., 2013. Petrogenesis of Cenozoic, alkalic volcanic lineages at Mount Morning, West Antarctica and their entrained lithospheric mantle xenoliths: Lithospheric versus asthenospheric mantle sources. Geochim. Cosmochim. Acta, 122(0): 127-152.	XRF	44.735	4.185	16.637	12.52		0.22	4.97	9.645	4.377	1.667	0.992									0.282	100.23				Martin, A.P., Cooper, A.F. and Price, R.C., 2013. Petrogenesis of Cenozoic, alkalic volcanic lineages at Mount Morning, West Antarctica and their entrained lithospheric mantle xenoliths: Lithospheric versus asthenospheric mantle sources. Geochim. Cosmochim. Acta, 122(0): 127-152.	LA-ICPMS				457.95		120.757	52.9723	23.1748
Mount Morning Volcanic Field	Mount Morning	-	Riviera Ridge Lineage	Tephrite	OU78601	519				54.6693	33.2	Martin, A.P., Cooper, A.F. and Price, R.C., 2013. Petrogenesis of Cenozoic, alkalic volcanic lineages at Mount Morning, West Antarctica and their entrained lithospheric mantle xenoliths: Lithospheric versus asthenospheric mantle sources. Geochim. Cosmochim. Acta, 122(0): 127-152.	XRF	44.825	3.915	15.617	12.63		0.21	6.15	11.355	4.037	1.527	0.792									-0.443	100.615				Martin, A.P., Cooper, A.F. and Price, R.C., 2013. Petrogenesis of Cenozoic, alkalic volcanic lineages at Mount Morning, West Antarctica and their entrained lithospheric mantle xenoliths: Lithospheric versus asthenospheric mantle sources. Geochim. Cosmochim. Acta, 122(0): 127-152.	XRF				516		90	-	108
Mount Morning Volcanic Field	Mount Morning	-	Riviera Ridge Lineage	Tephrite	OU78543	73A				61.3058	31.2	Martin, A.P., Cooper, A.F. and Price, R.C., 2013. Petrogenesis of Cenozoic, alkalic volcanic lineages at Mount Morning, West Antarctica and their entrained lithospheric mantle xenoliths: Lithospheric versus asthenospheric mantle sources. Geochim. Cosmochim. Acta, 122(0): 127-152.	XRF	45.005	2.855	15.227	11.99		0.2	7.67	10.945	3.587	1.357	0.622									0.72	100.178				Martin, A.P., Cooper, A.F. and Price, R.C., 2013. Petrogenesis of Cenozoic, alkalic volcanic lineages at Mount Morning, West Antarctica and their entrained lithospheric mantle xenoliths: Lithospheric versus asthenospheric mantle sources. Geochim. Cosmochim. Acta, 122(0): 127-152.	XRF				413		87	-	362
Mount Morning Volcanic Field	Mount Morning	-	Riviera Ridge Lineage	Tephrite	OU78593	430				62.0543	31.5	Martin, A.P., Cooper, A.F. and Price, R.C., 2013. Petrogenesis of Cenozoic, alkalic volcanic lineages at Mount Morning, West Antarctica and their entrained lithospheric mantle xenoliths: Lithospheric versus asthenospheric mantle sources. Geochim. Cosmochim. Acta, 122(0): 127-152.	XRF	45.065	2.875	15.567	12.01		0.21	7.93	11.275	3.907	1.447	0.822									-0.443	100.665				Martin, A.P., Cooper, A.F. and Price, R.C., 2013. Petrogenesis of Cenozoic, alkalic volcanic lineages at Mount Morning, West Antarctica and their entrained lithospheric mantle xenoliths: Lithospheric versus asthenospheric mantle sources. Geochim. Cosmochim. Acta, 122(0): 127-152.	XRF				487		88	-	334
Mount Morning Volcanic Field	Mount Morning	-	Riviera Ridge Lineage	Basanite	OU78591	419				62.9722	36.7	Martin, A.P., Cooper, A.F. and Price, R.C., 2013. Petrogenesis of Cenozoic, alkalic volcanic lineages at Mount Morning, West Antarctica and their entrained lithospheric mantle xenoliths: Lithospheric versus asthenospheric mantle sources. Geochim. Cosmochim. Acta, 122(0): 127-152.	XRF	45.105	2.905	14.967	12.67		0.21	8.7	9.345	4.157	1.797	0.912									-0.39	100.378				Martin, A.P., Cooper, A.F. and Price, R.C., 2013. Petrogenesis of Cenozoic, alkalic volcanic lineages at Mount Morning, West Antarctica and their entrained lithospheric mantle xenoliths: Lithospheric versus asthenospheric mantle sources. Geochim. Cosmochim. Acta, 122(0): 127-152.	LA-ICPMS				418.186		94.621	55.8902	184.513
Mount Morning Volcanic Field	Mount Morning	-	Riviera Ridge Lineage	Tephrite	OU78549	111				59.1238	34.4	Martin, A.P., Cooper, A.F. and Price, R.C., 2013. Petrogenesis of Cenozoic, alkalic volcanic lineages at Mount Morning, West Antarctica and their entrained lithospheric mantle xenoliths: Lithospheric versus asthenospheric mantle sources. Geochim. Cosmochim. Acta, 122(0): 127-152.	XRF	45.245	3.355	15.527	12.5		0.21	7.3	10.365	4.087	1.477	0.812									-0.422	100.456				Martin, A.P., Cooper, A.F. and Price, R.C., 2013. Petrogenesis of Cenozoic, alkalic volcanic lineages at Mount Morning, West Antarctica and their entrained lithospheric mantle xenoliths: Lithospheric versus asthenospheric mantle sources. Geochim. Cosmochim. Acta, 122(0): 127-152.	XRF				468		113	-	297
Mount Morning Volcanic Field	Mount Morning	-	Riviera Ridge Lineage	Basanite	OU78565	264				63.0232	34.4	Martin, A.P., Cooper, A.F. and Price, R.C., 2013. Petrogenesis of Cenozoic, alkalic volcanic lineages at Mount Morning, West Antarctica and their entrained lithospheric mantle xenoliths: Lithospheric versus asthenospheric mantle sources. Geochim. Cosmochim. Acta, 122(0): 127-152.	XRF	45.265	3.155	14.627	13.18		0.21	9.07	9.585	4.057	1.727	0.692									-0.611	100.957				Martin, A.P., Cooper, A.F. and Price, R.C., 2013. Petrogenesis of Cenozoic, alkalic volcanic lineages at Mount Morning, West Antarctica and their entrained lithospheric mantle xenoliths: Lithospheric versus asthenospheric mantle sources. Geochim. Cosmochim. Acta, 122(0): 127-152.	LA-ICPMS				35.3886		7.21474	50.5704	124.924
Mount Morning Volcanic Field	Mount Morning	-	Riviera Ridge Lineage	Basalt	OU78532	21				65.899	23.9	Martin, A.P., Cooper, A.F. and Price, R.C., 2013. Petrogenesis of Cenozoic, alkalic volcanic lineages at Mount Morning, West Antarctica and their entrained lithospheric mantle xenoliths: Lithospheric versus asthenospheric mantle sources. Geochim. Cosmochim. Acta, 122(0): 127-152.	XRF	45.415	2.465	14.307	12.15		0.19	9.48	12.475	2.957	0.867	0.432									-0.547	100.191				Martin, A.P., Cooper, A.F. and Price, R.C., 2013. Petrogenesis of Cenozoic, alkalic volcanic lineages at Mount Morning, West Antarctica and their entrained lithospheric mantle xenoliths: Lithospheric versus asthenospheric mantle sources. Geochim. Cosmochim. Acta, 122(0): 127-152.	XRF				286		56	-	364
Mount Morning Volcanic Field	Mount Morning	-	Riviera Ridge Lineage	Basalt	OU78544	74				65.899	23.9	Martin, A.P., Cooper, A.F. and Price, R.C., 2013. Petrogenesis of Cenozoic, alkalic volcanic lineages at Mount Morning, West Antarctica and their entrained lithospheric mantle xenoliths: Lithospheric versus asthenospheric mantle sources. Geochim. Cosmochim. Acta, 122(0): 127-152.	XRF	45.415	2.465	14.307	12.15		0.19	9.48	12.475	2.957	0.867	0.432									-0.547	100.191				Martin, A.P., Cooper, A.F. and Price, R.C., 2013. Petrogenesis of Cenozoic, alkalic volcanic lineages at Mount Morning, West Antarctica and their entrained lithospheric mantle xenoliths: Lithospheric versus asthenospheric mantle sources. Geochim. Cosmochim. Acta, 122(0): 127-152.	LA-ICPMS				366.492		97.9814	66.4526	461.227
Mount Morning Volcanic Field	Mount Morning	-	Riviera Ridge Lineage	Tephrite	OU78606	528				61.9254	36.1	Martin, A.P., Cooper, A.F. and Price, R.C., 2013. Petrogenesis of Cenozoic, alkalic volcanic lineages at Mount Morning, West Antarctica and their entrained lithospheric mantle xenoliths: Lithospheric versus asthenospheric mantle sources. Geochim. Cosmochim. Acta, 122(0): 127-152.	XRF	45.45	2.79	15.17	12.35		0.21	8.11	9.69	4.17	1.74	0.86									-0.4	100.14				Martin, A.P., Cooper, A.F. and Price, R.C., 2013. Petrogenesis of Cenozoic, alkalic volcanic lineages at Mount Morning, West Antarctica and their entrained lithospheric mantle xenoliths: Lithospheric versus asthenospheric mantle sources. Geochim. Cosmochim. Acta, 122(0): 127-152.	XRF				635		124	-	225
Mount Morning Volcanic Field	Mount Morning	-	Riviera Ridge Lineage	Tephrite	OU78546	104				52.3179	40.9	Martin, A.P., Cooper, A.F. and Price, R.C., 2013. Petrogenesis of Cenozoic, alkalic volcanic lineages at Mount Morning, West Antarctica and their entrained lithospheric mantle xenoliths: Lithospheric versus asthenospheric mantle sources. Geochim. Cosmochim. Acta, 122(0): 127-152.	XRF	45.605	3.785	16.307	13.75		0.21	5.33	8.755	4.417	1.597	1.022									-0.39	100.388				Martin, A.P., Cooper, A.F. and Price, R.C., 2013. Petrogenesis of Cenozoic, alkalic volcanic lineages at Mount Morning, West Antarctica and their entrained lithospheric mantle xenoliths: Lithospheric versus asthenospheric mantle sources. Geochim. Cosmochim. Acta, 122(0): 127-152.	XRF				775		122	-	14
Mount Morning Volcanic Field	Mount Morning	-	Riviera Ridge Lineage	Tephrite	OU78537	61A				59.383	36	Martin, A.P., Cooper, A.F. and Price, R.C., 2013. Petrogenesis of Cenozoic, alkalic volcanic lineages at Mount Morning, West Antarctica and their entrained lithospheric mantle xenoliths: Lithospheric versus asthenospheric mantle sources. Geochim. Cosmochim. Acta, 122(0): 127-152.	XRF	45.805	3.095	15.517	12.79		0.21	7.55	9.515	4.087	1.527	0.732									-0.656	100.172				Martin, A.P., Cooper, A.F. and Price, R.C., 2013. Petrogenesis of Cenozoic, alkalic volcanic lineages at Mount Morning, West Antarctica and their entrained lithospheric mantle xenoliths: Lithospheric versus asthenospheric mantle sources. Geochim. Cosmochim. Acta, 122(0): 127-152.	XRF				460		84	-	244
Mount Morning Volcanic Field	Mount Morning	-	Riviera Ridge Lineage	Tephrite	OU78539	65				59.5253	35.8	Martin, A.P., Cooper, A.F. and Price, R.C., 2013. Petrogenesis of Cenozoic, alkalic volcanic lineages at Mount Morning, West Antarctica and their entrained lithospheric mantle xenoliths: Lithospheric versus asthenospheric mantle sources. Geochim. Cosmochim. Acta, 122(0): 127-152.	XRF	45.82	3.14	15.53	12.9		0.21	7.66	9.66	4.19	1.53	0.74									-0.67	100.71				Martin, A.P., Cooper, A.F. and Price, R.C., 2013. Petrogenesis of Cenozoic, alkalic volcanic lineages at Mount Morning, West Antarctica and their entrained lithospheric mantle xenoliths: Lithospheric versus asthenospheric mantle sources. Geochim. Cosmochim. Acta, 122(0): 127-152.	XRF				468		94	-	241
Mount Morning Volcanic Field	Mount Morning	-	Riviera Ridge Lineage	Tephrite	OU78574	286A				52.808	41.8	Martin, A.P., Cooper, A.F. and Price, R.C., 2013. Petrogenesis of Cenozoic, alkalic volcanic lineages at Mount Morning, West Antarctica and their entrained lithospheric mantle xenoliths: Lithospheric versus asthenospheric mantle sources. Geochim. Cosmochim. Acta, 122(0): 127-152.	XRF	45.845	3.695	16.687	12.85		0.22	5.08	8.925	4.357	1.767	1.212									-0.152	100.486				Martin, A.P., Cooper, A.F. and Price, R.C., 2013. Petrogenesis of Cenozoic, alkalic volcanic lineages at Mount Morning, West Antarctica and their entrained lithospheric mantle xenoliths: Lithospheric versus asthenospheric mantle sources. Geochim. Cosmochim. Acta, 122(0): 127-152.	XRF				617		103	-	50
Mount Morning Volcanic Field	Mount Morning	-	Riviera Ridge Lineage	Tephrite	OU78561	256A				52.7395	41.8	Martin, A.P., Cooper, A.F. and Price, R.C., 2013. Petrogenesis of Cenozoic, alkalic volcanic lineages at Mount Morning, West Antarctica and their entrained lithospheric mantle xenoliths: Lithospheric versus asthenospheric mantle sources. Geochim. Cosmochim. Acta, 122(0): 127-152.	XRF	45.875	3.695	16.687	12.86		0.22	5.07	8.935	4.347	1.767	1.222									-0.512	100.166				Martin, A.P., Cooper, A.F. and Price, R.C., 2013. Petrogenesis of Cenozoic, alkalic volcanic lineages at Mount Morning, West Antarctica and their entrained lithospheric mantle xenoliths: Lithospheric versus asthenospheric mantle sources. Geochim. Cosmochim. Acta, 122(0): 127-152.	XRF				551		103	-	377
Mount Morning Volcanic Field	Mount Morning	-	Riviera Ridge Lineage	Tephrite	OU78542	72				58.2358	44.2	Martin, A.P., Cooper, A.F. and Price, R.C., 2013. Petrogenesis of Cenozoic, alkalic volcanic lineages at Mount Morning, West Antarctica and their entrained lithospheric mantle xenoliths: Lithospheric versus asthenospheric mantle sources. Geochim. Cosmochim. Acta, 122(0): 127-152.	XRF	46.825	2.685	16.247	12.2		0.22	6.01	8.435	4.757	1.847	0.862									0.627	100.715				Martin, A.P., Cooper, A.F. and Price, R.C., 2013. Petrogenesis of Cenozoic, alkalic volcanic lineages at Mount Morning, West Antarctica and their entrained lithospheric mantle xenoliths: Lithospheric versus asthenospheric mantle sources. Geochim. Cosmochim. Acta, 122(0): 127-152.	XRF				646		134	-	149
Mount Morning Volcanic Field	Mount Morning	-	Riviera Ridge Lineage	Tephrite	OU78586	410				49.5017	49	Martin, A.P., Cooper, A.F. and Price, R.C., 2013. Petrogenesis of Cenozoic, alkalic volcanic lineages at Mount Morning, West Antarctica and their entrained lithospheric mantle xenoliths: Lithospheric versus asthenospheric mantle sources. Geochim. Cosmochim. Acta, 122(0): 127-152.	XRF	46.945	3.205	16.887	11.81		0.24	4.09	7.725	4.877	1.927	1.632									0.742	100.08				Martin, A.P., Cooper, A.F. and Price, R.C., 2013. Petrogenesis of Cenozoic, alkalic volcanic lineages at Mount Morning, West Antarctica and their entrained lithospheric mantle xenoliths: Lithospheric versus asthenospheric mantle sources. Geochim. Cosmochim. Acta, 122(0): 127-152.	XRF				776		125	-	7
Mount Morning Volcanic Field	Mount Morning	-	Riviera Ridge Lineage	Hawaiite	OU78529	3				55.7973	42.4	Martin, A.P., Cooper, A.F. and Price, R.C., 2013. Petrogenesis of Cenozoic, alkalic volcanic lineages at Mount Morning, West Antarctica and their entrained lithospheric mantle xenoliths: Lithospheric versus asthenospheric mantle sources. Geochim. Cosmochim. Acta, 122(0): 127-152.	XRF	47.185	2.965	16.357	11.75		0.21	5.24	9.245	4.447	1.677	0.982									-0.184	99.874				Martin, A.P., Cooper, A.F. and Price, R.C., 2013. Petrogenesis of Cenozoic, alkalic volcanic lineages at Mount Morning, West Antarctica and their entrained lithospheric mantle xenoliths: Lithospheric versus asthenospheric mantle sources. Geochim. Cosmochim. Acta, 122(0): 127-152.	LA-ICPMS				478.254		101.797	44.6539	179.992
Mount Morning Volcanic Field	Mount Morning	-	Riviera Ridge Lineage	Tephrite	OU78530	4B				51.5414	47.3	Martin, A.P., Cooper, A.F. and Price, R.C., 2013. Petrogenesis of Cenozoic, alkalic volcanic lineages at Mount Morning, West Antarctica and their entrained lithospheric mantle xenoliths: Lithospheric versus asthenospheric mantle sources. Geochim. Cosmochim. Acta, 122(0): 127-152.	XRF	48.055	2.905	16.727	11.47		0.22	4.31	8.205	4.947	1.847	1.112									0.133	99.931				Martin, A.P., Cooper, A.F. and Price, R.C., 2013. Petrogenesis of Cenozoic, alkalic volcanic lineages at Mount Morning, West Antarctica and their entrained lithospheric mantle xenoliths: Lithospheric versus asthenospheric mantle sources. Geochim. Cosmochim. Acta, 122(0): 127-152.	XRF				769		128	-	28
Mount Morning Volcanic Field	Mount Morning	-	Riviera Ridge Lineage	Tephrite	OU78556	241	1.85	0.03	Martin, A.P., Cooper, A.F. and Dunlap, W.J., 2010. Geochronology of Mount Morning, Antarctica: Two-phase evolution of a long-lived trachyte-basanite-phonolite eruptive center. Bull. Volcanol., 72: 357-371, doi: 310.1007/s00445-00009-00319-00441.	62.3321	47.6	Martin, A.P., Cooper, A.F. and Price, R.C., 2013. Petrogenesis of Cenozoic, alkalic volcanic lineages at Mount Morning, West Antarctica and their entrained lithospheric mantle xenoliths: Lithospheric versus asthenospheric mantle sources. Geochim. Cosmochim. Acta, 122(0): 127-152.	XRF	48.385	2.595	16.327	10.4		0.2	6.08	8.335	5.167	2.457	0.592									-0.203	100.335				Martin, A.P., Cooper, A.F. and Price, R.C., 2013. Petrogenesis of Cenozoic, alkalic volcanic lineages at Mount Morning, West Antarctica and their entrained lithospheric mantle xenoliths: Lithospheric versus asthenospheric mantle sources. Geochim. Cosmochim. Acta, 122(0): 127-152.	LA-ICPMS				412.954		129.812	60.721	281.266
Mount Morning Volcanic Field	Mount Morning	-	Riviera Ridge Lineage	Hawaiite	OU78654	219	3.88	0.05	Martin, A.P., Cooper, A.F. and Dunlap, W.J., 2010. Geochronology of Mount Morning, Antarctica: Two-phase evolution of a long-lived trachyte-basanite-phonolite eruptive center. Bull. Volcanol., 72: 357-371, doi: 310.1007/s00445-00009-00319-00441.	40.1791	41.5	Martin, A.P., Cooper, A.F. and Price, R.C., 2013. Petrogenesis of Cenozoic, alkalic volcanic lineages at Mount Morning, West Antarctica and their entrained lithospheric mantle xenoliths: Lithospheric versus asthenospheric mantle sources. Geochim. Cosmochim. Acta, 122(0): 127-152.	XRF	48.4	2.84	18.2	11.8		0.22	2.8	9.16	3.8	1.5	0.96									0.72	100.4				Martin, A.P., Cooper, A.F. and Price, R.C., 2013. Petrogenesis of Cenozoic, alkalic volcanic lineages at Mount Morning, West Antarctica and their entrained lithospheric mantle xenoliths: Lithospheric versus asthenospheric mantle sources. Geochim. Cosmochim. Acta, 122(0): 127-152.	LA-ICPMS				641.537		91.1029	41.0867	23.0232
Mount Morning Volcanic Field	Mount Morning	-	Riviera Ridge Lineage	PhonoTeph	OU78548	106D				47.3806	57.5	Martin, A.P., Cooper, A.F. and Price, R.C., 2013. Petrogenesis of Cenozoic, alkalic volcanic lineages at Mount Morning, West Antarctica and their entrained lithospheric mantle xenoliths: Lithospheric versus asthenospheric mantle sources. Geochim. Cosmochim. Acta, 122(0): 127-152.	XRF	50.345	2.365	17.147	11.07		0.25	3.27	6.575	5.727	2.407	1.292									-0.346	100.102				Martin, A.P., Cooper, A.F. and Price, R.C., 2013. Petrogenesis of Cenozoic, alkalic volcanic lineages at Mount Morning, West Antarctica and their entrained lithospheric mantle xenoliths: Lithospheric versus asthenospheric mantle sources. Geochim. Cosmochim. Acta, 122(0): 127-152.	LA-ICPMS				660.12		149.962	25.7343	15.9606
Mount Morning Volcanic Field	Mount Morning	-	Riviera Ridge Lineage	Mugearite	OU78651	215A				35.6334	54.7	Martin, A.P., Cooper, A.F. and Price, R.C., 2013. Petrogenesis of Cenozoic, alkalic volcanic lineages at Mount Morning, West Antarctica and their entrained lithospheric mantle xenoliths: Lithospheric versus asthenospheric mantle sources. Geochim. Cosmochim. Acta, 122(0): 127-152.	XRF	51.36	2.49	15.35	13.16		0.25	2.39	6.51	4.72	2.39	1.1									0.86	100.58				Martin, A.P., Cooper, A.F. and Price, R.C., 2013. Petrogenesis of Cenozoic, alkalic volcanic lineages at Mount Morning, West Antarctica and their entrained lithospheric mantle xenoliths: Lithospheric versus asthenospheric mantle sources. Geochim. Cosmochim. Acta, 122(0): 127-152.	LA-ICPMS				829.619		141.634	24.027	20.4583
Mount Morning Volcanic Field	Mount Morning	-	Riviera Ridge Lineage	Tephriphono	OU78610	153				37.3064	76.3	Martin, A.P., Cooper, A.F. and Price, R.C., 2013. Petrogenesis of Cenozoic, alkalic volcanic lineages at Mount Morning, West Antarctica and their entrained lithospheric mantle xenoliths: Lithospheric versus asthenospheric mantle sources. Geochim. Cosmochim. Acta, 122(0): 127-152.	XRF	55	1.24	20.08	6.16		0.21	1.11	4.25	8.09	4.04	0.34									0.34	100.86				Martin, A.P., Cooper, A.F. and Price, R.C., 2013. Petrogenesis of Cenozoic, alkalic volcanic lineages at Mount Morning, West Antarctica and their entrained lithospheric mantle xenoliths: Lithospheric versus asthenospheric mantle sources. Geochim. Cosmochim. Acta, 122(0): 127-152.	LA-ICPMS				564.968		147.781	23.1299	16.0061
Mount Morning Volcanic Field	Mount Morning	-	Riviera Ridge Lineage	Tephriphono	OU78557	242B				40.3697	78.3	Martin, A.P., Cooper, A.F. and Price, R.C., 2013. Petrogenesis of Cenozoic, alkalic volcanic lineages at Mount Morning, West Antarctica and their entrained lithospheric mantle xenoliths: Lithospheric versus asthenospheric mantle sources. Geochim. Cosmochim. Acta, 122(0): 127-152.	XRF	55.225	1.245	19.487	6.39		0.19	1.31	3.645	8.037	4.307	0.322									0.065	100.223				Martin, A.P., Cooper, A.F. and Price, R.C., 2013. Petrogenesis of Cenozoic, alkalic volcanic lineages at Mount Morning, West Antarctica and their entrained lithospheric mantle xenoliths: Lithospheric versus asthenospheric mantle sources. Geochim. Cosmochim. Acta, 122(0): 127-152.	LA-ICPMS				574.27		151.656	27.7114	16.8293
Mount Morning Volcanic Field	Mount Morning	-	Riviera Ridge Lineage	Benmoreite	OU78620	508				46.5032	74.1	Martin, A.P., Cooper, A.F. and Price, R.C., 2013. Petrogenesis of Cenozoic, alkalic volcanic lineages at Mount Morning, West Antarctica and their entrained lithospheric mantle xenoliths: Lithospheric versus asthenospheric mantle sources. Geochim. Cosmochim. Acta, 122(0): 127-152.	XRF	56.67	1.15	18.08	7.18		0.2	1.89	3.87	6.48	4.16	0.35									0.35	100.38				Martin, A.P., Cooper, A.F. and Price, R.C., 2013. Petrogenesis of Cenozoic, alkalic volcanic lineages at Mount Morning, West Antarctica and their entrained lithospheric mantle xenoliths: Lithospheric versus asthenospheric mantle sources. Geochim. Cosmochim. Acta, 122(0): 127-152.	LA-ICPMS				543.097		157.382	26.0675	26.1241
Mount Morning Volcanic Field	Mount Morning	-	Riviera Ridge Lineage	Phonolite	OU78609	151B				21.4978	84.6	Martin, A.P., Cooper, A.F. and Price, R.C., 2013. Petrogenesis of Cenozoic, alkalic volcanic lineages at Mount Morning, West Antarctica and their entrained lithospheric mantle xenoliths: Lithospheric versus asthenospheric mantle sources. Geochim. Cosmochim. Acta, 122(0): 127-152.	XRF	57.06	0.42	20.38	4.92		0.21	0.34	1.67	9.94	5.06	0.12									0.55	100.67				Martin, A.P., Cooper, A.F. and Price, R.C., 2013. Petrogenesis of Cenozoic, alkalic volcanic lineages at Mount Morning, West Antarctica and their entrained lithospheric mantle xenoliths: Lithospheric versus asthenospheric mantle sources. Geochim. Cosmochim. Acta, 122(0): 127-152.	XRF				262		180	-	1
Mount Morning Volcanic Field	Mount Morning	-	Riviera Ridge Lineage	Phonolite	OU78615	244B				39.3116	81.6	Martin, A.P., Cooper, A.F. and Price, R.C., 2013. Petrogenesis of Cenozoic, alkalic volcanic lineages at Mount Morning, West Antarctica and their entrained lithospheric mantle xenoliths: Lithospheric versus asthenospheric mantle sources. Geochim. Cosmochim. Acta, 122(0): 127-152.	XRF	57.5	0.99	18.92	6.24		0.24	1.02	2.81	7.73	4.37	0.32									0.08	100.22				Martin, A.P., Cooper, A.F. and Price, R.C., 2013. Petrogenesis of Cenozoic, alkalic volcanic lineages at Mount Morning, West Antarctica and their entrained lithospheric mantle xenoliths: Lithospheric versus asthenospheric mantle sources. Geochim. Cosmochim. Acta, 122(0): 127-152.	XRF				876		174	-	2
Mount Morning Volcanic Field	Mount Morning	-	Riviera Ridge Lineage	Phonolite	OU78616	250B				32.6048	83.4	Martin, A.P., Cooper, A.F. and Price, R.C., 2013. Petrogenesis of Cenozoic, alkalic volcanic lineages at Mount Morning, West Antarctica and their entrained lithospheric mantle xenoliths: Lithospheric versus asthenospheric mantle sources. Geochim. Cosmochim. Acta, 122(0): 127-152.	XRF	57.53	0.83	19.71	5.57		0.21	0.68	2.9	7.93	4.98	0.23									0.42	100.99				Martin, A.P., Cooper, A.F. and Price, R.C., 2013. Petrogenesis of Cenozoic, alkalic volcanic lineages at Mount Morning, West Antarctica and their entrained lithospheric mantle xenoliths: Lithospheric versus asthenospheric mantle sources. Geochim. Cosmochim. Acta, 122(0): 127-152.	XRF				543		186	-	bdl
Mount Morning Volcanic Field	Mount Morning	-	Riviera Ridge Lineage	Phonolite	OU78600	518	1.88	0.03	Martin, A.P., Cooper, A.F. and Dunlap, W.J., 2010. Geochronology of Mount Morning, Antarctica: Two-phase evolution of a long-lived trachyte-basanite-phonolite eruptive center. Bull. Volcanol., 72: 357-371, doi: 310.1007/s00445-00009-00319-00441.	37.4795	85.1	Martin, A.P., Cooper, A.F. and Price, R.C., 2013. Petrogenesis of Cenozoic, alkalic volcanic lineages at Mount Morning, West Antarctica and their entrained lithospheric mantle xenoliths: Lithospheric versus asthenospheric mantle sources. Geochim. Cosmochim. Acta, 122(0): 127-152.	XRF	57.605	0.865	19.477	5.09		0.17	0.77	2.545	7.927	5.167	0.212									0.31	100.138				Martin, A.P., Cooper, A.F. and Price, R.C., 2013. Petrogenesis of Cenozoic, alkalic volcanic lineages at Mount Morning, West Antarctica and their entrained lithospheric mantle xenoliths: Lithospheric versus asthenospheric mantle sources. Geochim. Cosmochim. Acta, 122(0): 127-152.	LA-ICPMS				543.347		126.614	33.4924	19.4502
Mount Morning Volcanic Field	Mount Morning	-	Riviera Ridge Lineage	Phonolite	OU78608	151A	1.12	0.05	Martin, A.P., Cooper, A.F. and Dunlap, W.J., 2010. Geochronology of Mount Morning, Antarctica: Two-phase evolution of a long-lived trachyte-basanite-phonolite eruptive center. Bull. Volcanol., 72: 357-371, doi: 310.1007/s00445-00009-00319-00441.	28.9797	87.9	Martin, A.P., Cooper, A.F. and Price, R.C., 2013. Petrogenesis of Cenozoic, alkalic volcanic lineages at Mount Morning, West Antarctica and their entrained lithospheric mantle xenoliths: Lithospheric versus asthenospheric mantle sources. Geochim. Cosmochim. Acta, 122(0): 127-152.	XRF	57.63	0.58	20.07	5.05		0.18	0.52	2.08	8.69	5.18	0.15									0.23	100.36				Martin, A.P., Cooper, A.F. and Price, R.C., 2013. Petrogenesis of Cenozoic, alkalic volcanic lineages at Mount Morning, West Antarctica and their entrained lithospheric mantle xenoliths: Lithospheric versus asthenospheric mantle sources. Geochim. Cosmochim. Acta, 122(0): 127-152.	LA-ICPMS				410.887		146.113	31.7744	25.1777
Mount Morning Volcanic Field	Mount Morning	-	Riviera Ridge Lineage	Phonolite	OU78614	242C				27.1145	87.8	Martin, A.P., Cooper, A.F. and Price, R.C., 2013. Petrogenesis of Cenozoic, alkalic volcanic lineages at Mount Morning, West Antarctica and their entrained lithospheric mantle xenoliths: Lithospheric versus asthenospheric mantle sources. Geochim. Cosmochim. Acta, 122(0): 127-152.	XRF	57.63	0.55	20.09	4.9		0.18	0.46	1.93	8.35	5.38	0.14									0.74	100.35				Martin, A.P., Cooper, A.F. and Price, R.C., 2013. Petrogenesis of Cenozoic, alkalic volcanic lineages at Mount Morning, West Antarctica and their entrained lithospheric mantle xenoliths: Lithospheric versus asthenospheric mantle sources. Geochim. Cosmochim. Acta, 122(0): 127-152.	XRF				469		143	-	2
Mount Morning Volcanic Field	Mount Morning	-	Riviera Ridge Lineage	Benmoreite	OU78607	100A				21.8482	79.4	Martin, A.P., Cooper, A.F. and Price, R.C., 2013. Petrogenesis of Cenozoic, alkalic volcanic lineages at Mount Morning, West Antarctica and their entrained lithospheric mantle xenoliths: Lithospheric versus asthenospheric mantle sources. Geochim. Cosmochim. Acta, 122(0): 127-152.	XRF	58.23	0.67	17.93	7.56		0.24	0.64	2.7	6.8	3.94	0.26									0.97	99.94				Martin, A.P., Cooper, A.F. and Price, R.C., 2013. Petrogenesis of Cenozoic, alkalic volcanic lineages at Mount Morning, West Antarctica and their entrained lithospheric mantle xenoliths: Lithospheric versus asthenospheric mantle sources. Geochim. Cosmochim. Acta, 122(0): 127-152.	LA-ICPMS				1111.87		208.272	22.5009	25.3434
Mount Morning Volcanic Field	Mount Morning	-	Riviera Ridge Lineage	Phonolite	OU78623	530				25.6278	88.3	Martin, A.P., Cooper, A.F. and Price, R.C., 2013. Petrogenesis of Cenozoic, alkalic volcanic lineages at Mount Morning, West Antarctica and their entrained lithospheric mantle xenoliths: Lithospheric versus asthenospheric mantle sources. Geochim. Cosmochim. Acta, 122(0): 127-152.	XRF	58.64	0.51	19.75	4.83		0.21	0.42	1.91	8.31	5.28	0.15									0.42	100.43				Martin, A.P., Cooper, A.F. and Price, R.C., 2013. Petrogenesis of Cenozoic, alkalic volcanic lineages at Mount Morning, West Antarctica and their entrained lithospheric mantle xenoliths: Lithospheric versus asthenospheric mantle sources. Geochim. Cosmochim. Acta, 122(0): 127-152.	XRF				444		157	-	0
Mount Morning Volcanic Field	Mount Morning	-	Riviera Ridge Lineage	Phonolite	OU78622	514				33.1672	86.3	Martin, A.P., Cooper, A.F. and Price, R.C., 2013. Petrogenesis of Cenozoic, alkalic volcanic lineages at Mount Morning, West Antarctica and their entrained lithospheric mantle xenoliths: Lithospheric versus asthenospheric mantle sources. Geochim. Cosmochim. Acta, 122(0): 127-152.	XRF	59.34	0.62	18.78	5.35		0.2	0.67	2.01	7.64	4.98	0.23									0.49	100.31				Martin, A.P., Cooper, A.F. and Price, R.C., 2013. Petrogenesis of Cenozoic, alkalic volcanic lineages at Mount Morning, West Antarctica and their entrained lithospheric mantle xenoliths: Lithospheric versus asthenospheric mantle sources. Geochim. Cosmochim. Acta, 122(0): 127-152.	XRF				549		124	-	0
Mount Morning Volcanic Field	Mount Morning	-	Riviera Ridge Lineage	Phonolite	OU78621	510				19.0663	87.9	Martin, A.P., Cooper, A.F. and Price, R.C., 2013. Petrogenesis of Cenozoic, alkalic volcanic lineages at Mount Morning, West Antarctica and their entrained lithospheric mantle xenoliths: Lithospheric versus asthenospheric mantle sources. Geochim. Cosmochim. Acta, 122(0): 127-152.	XRF	59.41	0.35	19.39	4.71		0.23	0.28	1.12	8.76	5.46	0.07									0.65	100.43				Martin, A.P., Cooper, A.F. and Price, R.C., 2013. Petrogenesis of Cenozoic, alkalic volcanic lineages at Mount Morning, West Antarctica and their entrained lithospheric mantle xenoliths: Lithospheric versus asthenospheric mantle sources. Geochim. Cosmochim. Acta, 122(0): 127-152.	XRF				223		218	-	5
Mount Morning Volcanic Field	Mount Morning	-	Riviera Ridge Lineage	Phonolite	OU78618	502				16.2466	89.9	Martin, A.P., Cooper, A.F. and Price, R.C., 2013. Petrogenesis of Cenozoic, alkalic volcanic lineages at Mount Morning, West Antarctica and their entrained lithospheric mantle xenoliths: Lithospheric versus asthenospheric mantle sources. Geochim. Cosmochim. Acta, 122(0): 127-152.	XRF	59.46	0.41	19.55	4.29		0.18	0.21	1.82	8.33	5.47	0.06									0.49	100.27				Martin, A.P., Cooper, A.F. and Price, R.C., 2013. Petrogenesis of Cenozoic, alkalic volcanic lineages at Mount Morning, West Antarctica and their entrained lithospheric mantle xenoliths: Lithospheric versus asthenospheric mantle sources. Geochim. Cosmochim. Acta, 122(0): 127-152.	XRF				1349		138	-	1
Mount Morning Volcanic Field	Mount Morning	-	Riviera Ridge Lineage	Phonolite	OU78611	154A				14.6972	89.6	Martin, A.P., Cooper, A.F. and Price, R.C., 2013. Petrogenesis of Cenozoic, alkalic volcanic lineages at Mount Morning, West Antarctica and their entrained lithospheric mantle xenoliths: Lithospheric versus asthenospheric mantle sources. Geochim. Cosmochim. Acta, 122(0): 127-152.	XRF	59.7	0.41	19.65	4.37		0.19	0.19	1.52	7.86	5.57	0.06									0.72	100.24				Martin, A.P., Cooper, A.F. and Price, R.C., 2013. Petrogenesis of Cenozoic, alkalic volcanic lineages at Mount Morning, West Antarctica and their entrained lithospheric mantle xenoliths: Lithospheric versus asthenospheric mantle sources. Geochim. Cosmochim. Acta, 122(0): 127-152.	XRF				3450		147	-	1
Mount Morning Volcanic Field	Mount Morning	-	Riviera Ridge Lineage	Phonolite	OU78619	504	1.19	0.03	Martin, A.P., Cooper, A.F. and Dunlap, W.J., 2010. Geochronology of Mount Morning, Antarctica: Two-phase evolution of a long-lived trachyte-basanite-phonolite eruptive center. Bull. Volcanol., 72: 357-371, doi: 310.1007/s00445-00009-00319-00441.	13.4367	90.4	Martin, A.P., Cooper, A.F. and Price, R.C., 2013. Petrogenesis of Cenozoic, alkalic volcanic lineages at Mount Morning, West Antarctica and their entrained lithospheric mantle xenoliths: Lithospheric versus asthenospheric mantle sources. Geochim. Cosmochim. Acta, 122(0): 127-152.	XRF	59.83	0.4	19.6	4.34		0.19	0.17	1.75	8.23	5.55	0.06									0.39	100.51				Martin, A.P., Cooper, A.F. and Price, R.C., 2013. Petrogenesis of Cenozoic, alkalic volcanic lineages at Mount Morning, West Antarctica and their entrained lithospheric mantle xenoliths: Lithospheric versus asthenospheric mantle sources. Geochim. Cosmochim. Acta, 122(0): 127-152.	LA-ICPMS				1044.44		130.004	19.763	16.3862
Mount Morning Volcanic Field	Mount Morning	-	Riviera Ridge Lineage	Phonolite	OU78612	155B				20.2567	90.6	Martin, A.P., Cooper, A.F. and Price, R.C., 2013. Petrogenesis of Cenozoic, alkalic volcanic lineages at Mount Morning, West Antarctica and their entrained lithospheric mantle xenoliths: Lithospheric versus asthenospheric mantle sources. Geochim. Cosmochim. Acta, 122(0): 127-152.	XRF	60.06	0.37	19.53	4.68		0.21	0.3	1.21	8.13	5.55	0.08									0.86	100.98				Martin, A.P., Cooper, A.F. and Price, R.C., 2013. Petrogenesis of Cenozoic, alkalic volcanic lineages at Mount Morning, West Antarctica and their entrained lithospheric mantle xenoliths: Lithospheric versus asthenospheric mantle sources. Geochim. Cosmochim. Acta, 122(0): 127-152.	XRF				272		195	-	8
Mount Morning Volcanic Field	Mount Morning	Castle Ridge		Comendite Trachyte	77m82							Muncy, H.L., 1979. Geologic history and petrogenesis of alkaline volcanic rocks, Mount Morning, Antarctica, MSc thesis (Geology), Ohio State University, Columbus, p. 112 pp.	XRF	60.98	0.38	15.2	5.44	1.44	0.42	0.22	0.9		4.94	0.02							3.02				INAA		6.32	Muncy, H.L., 1979. Geologic history and petrogenesis of alkaline volcanic rocks, Mount Morning, Antarctica, MSc thesis (Geology), Ohio State University, Columbus, p. 112 pp.	XRF				22						6
Mount Morning Volcanic Field	Mount Morning	Castle Ridge		Quartz Trachytes	77m79							Muncy, H.L., 1979. Geologic history and petrogenesis of alkaline volcanic rocks, Mount Morning, Antarctica, MSc thesis (Geology), Ohio State University, Columbus, p. 112 pp.	XRF	62.44	0.45	15.88	3.73	0.08	0.04	0.41	2.48		5.36	0.09							3.6				INAA		4.63	Muncy, H.L., 1979. Geologic history and petrogenesis of alkaline volcanic rocks, Mount Morning, Antarctica, MSc thesis (Geology), Ohio State University, Columbus, p. 112 pp.	XRF				86				2		8
Mount Morning Volcanic Field	Mount Morning	Castle Ridge		Quartz Trachytes	77m80							Muncy, H.L., 1979. Geologic history and petrogenesis of alkaline volcanic rocks, Mount Morning, Antarctica, MSc thesis (Geology), Ohio State University, Columbus, p. 112 pp.	XRF	63.81	0.46	16.28	2.81	1.12	0.07	0.44	1.95		5.68	0.08							2.34				INAA		4.7	Muncy, H.L., 1979. Geologic history and petrogenesis of alkaline volcanic rocks, Mount Morning, Antarctica, MSc thesis (Geology), Ohio State University, Columbus, p. 112 pp.	XRF				825				2		8
Mount Morning Volcanic Field	Mount Morning	Castle Ridge		Quartz Trachyte	77m83							Muncy, H.L., 1979. Geologic history and petrogenesis of alkaline volcanic rocks, Mount Morning, Antarctica, MSc thesis (Geology), Ohio State University, Columbus, p. 112 pp.	XRF	64.62	0.47	16.97	2.94	0.2	0.04	0.46	1.62		5.78	0.1							2.18				INAA		5	Muncy, H.L., 1979. Geologic history and petrogenesis of alkaline volcanic rocks, Mount Morning, Antarctica, MSc thesis (Geology), Ohio State University, Columbus, p. 112 pp.	XRF				799						8
Mount Morning Volcanic Field	Mount Morning	Castle Ridge		Quartz Trachyte	77m81		15.19	0.2	Kyle, P.R. and Muncy, H.L., 1989. Geology and geochronology of McMurdo Volcanic Group rocks in the vicinity of Lake Morning, McMurdo Sound, Antarctica. Antarct. Sci., 1: 345 - 350.			Muncy, H.L., 1979. Geologic history and petrogenesis of alkaline volcanic rocks, Mount Morning, Antarctica, MSc thesis (Geology), Ohio State University, Columbus, p. 112 pp.	XRF	64.64	0.46	16.57	2.65	1.32	0.09	0.41	1.74		5.61	0.09							1.36				INAA		5.2	Muncy, H.L., 1979. Geologic history and petrogenesis of alkaline volcanic rocks, Mount Morning, Antarctica, MSc thesis (Geology), Ohio State University, Columbus, p. 112 pp.	XRF				805						8
Mount Morning Volcanic Field	Mount Morning	Castle Ridge		Comendite	77m84		14.63	0.21	Kyle, P.R. and Muncy, H.L., 1989. Geology and geochronology of McMurdo Volcanic Group rocks in the vicinity of Lake Morning, McMurdo Sound, Antarctica. Antarct. Sci., 1: 345 - 350.			Muncy, H.L., 1979. Geologic history and petrogenesis of alkaline volcanic rocks, Mount Morning, Antarctica, MSc thesis (Geology), Ohio State University, Columbus, p. 112 pp.	XRF	66.48	0.36	13.72	3.96	1.48	0.16	0.12	0.99		5.1	0.02							1.6				INAA		5.32	Muncy, H.L., 1979. Geologic history and petrogenesis of alkaline volcanic rocks, Mount Morning, Antarctica, MSc thesis (Geology), Ohio State University, Columbus, p. 112 pp.	XRF				33						9
Mount Morning Volcanic Field	Mount Morning	Gandalf R	Mason Spur Lineage	Mugearite	OU78710	204				38.562	51.7	Martin, A.P., Cooper, A.F. and Price, R.C., 2013. Petrogenesis of Cenozoic, alkalic volcanic lineages at Mount Morning, West Antarctica and their entrained lithospheric mantle xenoliths: Lithospheric versus asthenospheric mantle sources. Geochim. Cosmochim. Acta, 122(0): 127-152.	XRF	50.6	2.97	15.18	12.87		0.27	2.65	6.86	4.32	2.37	1.13									0.66	99.88				Martin, A.P., Cooper, A.F. and Price, R.C., 2013. Petrogenesis of Cenozoic, alkalic volcanic lineages at Mount Morning, West Antarctica and their entrained lithospheric mantle xenoliths: Lithospheric versus asthenospheric mantle sources. Geochim. Cosmochim. Acta, 122(0): 127-152.	LA-ICPMS				276.486		106.071	8.10634	30.4025
Mount Morning Volcanic Field	Mount Morning	Gandalf R	Mason Spur Lineage	Mugearite	OU78709	201B				38.5831	52.6	Martin, A.P., Cooper, A.F. and Price, R.C., 2013. Petrogenesis of Cenozoic, alkalic volcanic lineages at Mount Morning, West Antarctica and their entrained lithospheric mantle xenoliths: Lithospheric versus asthenospheric mantle sources. Geochim. Cosmochim. Acta, 122(0): 127-152.	XRF	50.85	2.49	15.34	12.81		0.27	2.64	6.61	4.39	2.33	1.15									1.44	100.32				Martin, A.P., Cooper, A.F. and Price, R.C., 2013. Petrogenesis of Cenozoic, alkalic volcanic lineages at Mount Morning, West Antarctica and their entrained lithospheric mantle xenoliths: Lithospheric versus asthenospheric mantle sources. Geochim. Cosmochim. Acta, 122(0): 127-152.	LA-ICPMS				74.6854		3.57934	102.537	84.325
Mount Morning Volcanic Field	Mount Morning	Gandalf R	Mason Spur Lineage	QB-Trachyte	OU78647	205B				12.9177	81.3	Martin, A.P., Cooper, A.F. and Price, R.C., 2013. Petrogenesis of Cenozoic, alkalic volcanic lineages at Mount Morning, West Antarctica and their entrained lithospheric mantle xenoliths: Lithospheric versus asthenospheric mantle sources. Geochim. Cosmochim. Acta, 122(0): 127-152.	XRF	61.29	0.55	13.59	7.48		0.38	0.28	2.77	5.25	5.15	0.1									3.59	100.43				Martin, A.P., Cooper, A.F. and Price, R.C., 2013. Petrogenesis of Cenozoic, alkalic volcanic lineages at Mount Morning, West Antarctica and their entrained lithospheric mantle xenoliths: Lithospheric versus asthenospheric mantle sources. Geochim. Cosmochim. Acta, 122(0): 127-152.	XRF				113		233	-	3
Mount Morning Volcanic Field	Mount Morning	Gandalf R	Mason Spur Lineage	QB-Trachyte	OU78646	205A				11.8752	84.8	Martin, A.P., Cooper, A.F. and Price, R.C., 2013. Petrogenesis of Cenozoic, alkalic volcanic lineages at Mount Morning, West Antarctica and their entrained lithospheric mantle xenoliths: Lithospheric versus asthenospheric mantle sources. Geochim. Cosmochim. Acta, 122(0): 127-152.	XRF	62.95	0.51	13.52	7.94		0.26	0.27	1.61	5.1	4.98	0.08									2.91	100.13				Martin, A.P., Cooper, A.F. and Price, R.C., 2013. Petrogenesis of Cenozoic, alkalic volcanic lineages at Mount Morning, West Antarctica and their entrained lithospheric mantle xenoliths: Lithospheric versus asthenospheric mantle sources. Geochim. Cosmochim. Acta, 122(0): 127-152.	XRF				99		338	-	3
Mount Morning Volcanic Field	Mount Morning	Gandalf R	Mason Spur Lineage	QB-Trachyte	OU78650	211				7.53297	84.8	Martin, A.P., Cooper, A.F. and Price, R.C., 2013. Petrogenesis of Cenozoic, alkalic volcanic lineages at Mount Morning, West Antarctica and their entrained lithospheric mantle xenoliths: Lithospheric versus asthenospheric mantle sources. Geochim. Cosmochim. Acta, 122(0): 127-152.	XRF	63.14	0.6	13.96	6.81		0.26	0.14	2.03	5	5.78	0.11									2.49	100.32				Martin, A.P., Cooper, A.F. and Price, R.C., 2013. Petrogenesis of Cenozoic, alkalic volcanic lineages at Mount Morning, West Antarctica and their entrained lithospheric mantle xenoliths: Lithospheric versus asthenospheric mantle sources. Geochim. Cosmochim. Acta, 122(0): 127-152.	XRF				181		212	-	bdl
Mount Morning Volcanic Field	Mount Morning	Gandalf R	Mason Spur Lineage	QB-Trachyte	OU78655	222				9.32656	80.1	Martin, A.P., Cooper, A.F. and Price, R.C., 2013. Petrogenesis of Cenozoic, alkalic volcanic lineages at Mount Morning, West Antarctica and their entrained lithospheric mantle xenoliths: Lithospheric versus asthenospheric mantle sources. Geochim. Cosmochim. Acta, 122(0): 127-152.	XRF	63.67	0.56	14.43	7.32		0.26	0.19	0.44	6.88	5.96	0.07									0.57	100.35				Martin, A.P., Cooper, A.F. and Price, R.C., 2013. Petrogenesis of Cenozoic, alkalic volcanic lineages at Mount Morning, West Antarctica and their entrained lithospheric mantle xenoliths: Lithospheric versus asthenospheric mantle sources. Geochim. Cosmochim. Acta, 122(0): 127-152.	LA-ICPMS				90.1508		254.708	17.6871	22.4125
Mount Morning Volcanic Field	Mount Morning	Gandalf R	Mason Spur Lineage	QB-Trachyte	OU78645	202				2.57664	77.7	Martin, A.P., Cooper, A.F. and Price, R.C., 2013. Petrogenesis of Cenozoic, alkalic volcanic lineages at Mount Morning, West Antarctica and their entrained lithospheric mantle xenoliths: Lithospheric versus asthenospheric mantle sources. Geochim. Cosmochim. Acta, 122(0): 127-152.	XRF	64.13	0.58	12.67	8.99		0.32	0.06	0.92	5.99	4.85	0.03									1.68	100.22				Martin, A.P., Cooper, A.F. and Price, R.C., 2013. Petrogenesis of Cenozoic, alkalic volcanic lineages at Mount Morning, West Antarctica and their entrained lithospheric mantle xenoliths: Lithospheric versus asthenospheric mantle sources. Geochim. Cosmochim. Acta, 122(0): 127-152.	XRF				33		410	-	bdl
Mount Morning Volcanic Field	Mount Morning	Gandalf R	Mason Spur Lineage	QB-Trachyte	OU78652	217				4.14244	74.4	Martin, A.P., Cooper, A.F. and Price, R.C., 2013. Petrogenesis of Cenozoic, alkalic volcanic lineages at Mount Morning, West Antarctica and their entrained lithospheric mantle xenoliths: Lithospheric versus asthenospheric mantle sources. Geochim. Cosmochim. Acta, 122(0): 127-152.	XRF	65.06	0.5	12.19	9.17		0.34	0.1	0.23	7.97	4.06	0.01									0.5	100.13				Martin, A.P., Cooper, A.F. and Price, R.C., 2013. Petrogenesis of Cenozoic, alkalic volcanic lineages at Mount Morning, West Antarctica and their entrained lithospheric mantle xenoliths: Lithospheric versus asthenospheric mantle sources. Geochim. Cosmochim. Acta, 122(0): 127-152.	XRF				4		110	-	42
Mount Morning Volcanic Field	Mount Morning	Gandalf R	Mason Spur Lineage	QB-Trachyte	OU78648	207				18.764	89.4	Martin, A.P., Cooper, A.F. and Price, R.C., 2013. Petrogenesis of Cenozoic, alkalic volcanic lineages at Mount Morning, West Antarctica and their entrained lithospheric mantle xenoliths: Lithospheric versus asthenospheric mantle sources. Geochim. Cosmochim. Acta, 122(0): 127-152.	XRF	68.49	0.62	12.42	5.49		0.06	0.32	0.18	4.36	5.8	0.04									1.58	99.36				Martin, A.P., Cooper, A.F. and Price, R.C., 2013. Petrogenesis of Cenozoic, alkalic volcanic lineages at Mount Morning, West Antarctica and their entrained lithospheric mantle xenoliths: Lithospheric versus asthenospheric mantle sources. Geochim. Cosmochim. Acta, 122(0): 127-152.	LA-ICPMS				33.2001		340.201	17.6035	30.0529
Mount Morning Volcanic Field	Mount Morning	Gandalf R	Mason Spur Lineage	Rhyolite	OU78649	208B				23.9761	86.5	Martin, A.P., Cooper, A.F. and Price, R.C., 2013. Petrogenesis of Cenozoic, alkalic volcanic lineages at Mount Morning, West Antarctica and their entrained lithospheric mantle xenoliths: Lithospheric versus asthenospheric mantle sources. Geochim. Cosmochim. Acta, 122(0): 127-152.	XRF	69.56	0.39	11.35	5.78		0.12	0.46	1.2	0.59	8.1	0.03									2.29	99.87				Martin, A.P., Cooper, A.F. and Price, R.C., 2013. Petrogenesis of Cenozoic, alkalic volcanic lineages at Mount Morning, West Antarctica and their entrained lithospheric mantle xenoliths: Lithospheric versus asthenospheric mantle sources. Geochim. Cosmochim. Acta, 122(0): 127-152.	LA-ICPMS				2769.17		188.965	23.3885	19.9635
Mount Morning Volcanic Field	Mount Morning	Gandalf R	Mason Spur Lineage	Rhyolite	OU78653	218				16.3103	94.1	Martin, A.P., Cooper, A.F. and Price, R.C., 2013. Petrogenesis of Cenozoic, alkalic volcanic lineages at Mount Morning, West Antarctica and their entrained lithospheric mantle xenoliths: Lithospheric versus asthenospheric mantle sources. Geochim. Cosmochim. Acta, 122(0): 127-152.	XRF	75.69	0.39	10.92	3.05		0.05	0.15	0.4	3.55	4.19	0.03									1.48	99.9				Martin, A.P., Cooper, A.F. and Price, R.C., 2013. Petrogenesis of Cenozoic, alkalic volcanic lineages at Mount Morning, West Antarctica and their entrained lithospheric mantle xenoliths: Lithospheric versus asthenospheric mantle sources. Geochim. Cosmochim. Acta, 122(0): 127-152.	LA-ICPMS				30.1285		304.49	20.2051	22.8547
Mount Morning Volcanic Field	Mount Morning	Gandalf Ridge		Basanite	77m21							Muncy, H.L., 1979. Geologic history and petrogenesis of alkaline volcanic rocks, Mount Morning, Antarctica, MSc thesis (Geology), Ohio State University, Columbus, p. 112 pp.	XRF	42.82	3.59	14.35	6.97	5.64	0.18	9	11.18		1.17	0.75							0.14				INAA		3.27	Muncy, H.L., 1979. Geologic history and petrogenesis of alkaline volcanic rocks, Mount Morning, Antarctica, MSc thesis (Geology), Ohio State University, Columbus, p. 112 pp.	XRF				398				391		51
Mount Morning Volcanic Field	Mount Morning	Gandalf Ridge	Trachyandesite (clasts)		77m64							Muncy, H.L., 1979. Geologic history and petrogenesis of alkaline volcanic rocks, Mount Morning, Antarctica, MSc thesis (Geology), Ohio State University, Columbus, p. 112 pp.	XRF	45.28	2.9	14.53	7.9	5.72	0.24	3.2	8.55		1.89	1.62							3.54				INAA		3.64	Muncy, H.L., 1979. Geologic history and petrogenesis of alkaline volcanic rocks, Mount Morning, Antarctica, MSc thesis (Geology), Ohio State University, Columbus, p. 112 pp.	XRF				618				3		10
Mount Morning Volcanic Field	Mount Morning	Gandalf Ridge		Basanite	77m23							Muncy, H.L., 1979. Geologic history and petrogenesis of alkaline volcanic rocks, Mount Morning, Antarctica, MSc thesis (Geology), Ohio State University, Columbus, p. 112 pp.	XRF	46.69	3.31	17.84	8.48	2.52	0.17	3.86	9.14		1.56	0.88							1.04				INAA		3.94	Muncy, H.L., 1979. Geologic history and petrogenesis of alkaline volcanic rocks, Mount Morning, Antarctica, MSc thesis (Geology), Ohio State University, Columbus, p. 112 pp.	XRF				572				19		18
Mount Morning Volcanic Field	Mount Morning	Gandalf Ridge		Trachyandesite	77m59							Muncy, H.L., 1979. Geologic history and petrogenesis of alkaline volcanic rocks, Mount Morning, Antarctica, MSc thesis (Geology), Ohio State University, Columbus, p. 112 pp.	XRF	47.61	2.77	17.97	8.52	2.44	0.17	2.63	8.8		1.44	0.9							1.49				INAA		3.65	Muncy, H.L., 1979. Geologic history and petrogenesis of alkaline volcanic rocks, Mount Morning, Antarctica, MSc thesis (Geology), Ohio State University, Columbus, p. 112 pp.	XRF				586				2		14
Mount Morning Volcanic Field	Mount Morning	Gandalf Ridge		Trachyandesite	77m28							Muncy, H.L., 1979. Geologic history and petrogenesis of alkaline volcanic rocks, Mount Morning, Antarctica, MSc thesis (Geology), Ohio State University, Columbus, p. 112 pp.	XRF	49.94	2.46	15.26	6.35	5.48	0.25	2.64	6.28		2.34	1.05							1.97				INAA		4.69	Muncy, H.L., 1979. Geologic history and petrogenesis of alkaline volcanic rocks, Mount Morning, Antarctica, MSc thesis (Geology), Ohio State University, Columbus, p. 112 pp.	XRF				895				2		12
Mount Morning Volcanic Field	Mount Morning	Gandalf Ridge		Trachyandesite	77m41							Muncy, H.L., 1979. Geologic history and petrogenesis of alkaline volcanic rocks, Mount Morning, Antarctica, MSc thesis (Geology), Ohio State University, Columbus, p. 112 pp.	XRF	50.16	2.41	15.09	5.17	6.8	0.24	2.44	6.39		2.27	1							2.15				INAA		4.61	Muncy, H.L., 1979. Geologic history and petrogenesis of alkaline volcanic rocks, Mount Morning, Antarctica, MSc thesis (Geology), Ohio State University, Columbus, p. 112 pp.	XRF				927				5		12
Mount Morning Volcanic Field	Mount Morning	Gandalf Ridge		Trachyandesite	77m11							Muncy, H.L., 1979. Geologic history and petrogenesis of alkaline volcanic rocks, Mount Morning, Antarctica, MSc thesis (Geology), Ohio State University, Columbus, p. 112 pp.	XRF	50.33	2.42	15.2	6.44	5.84	0.23	2.9	6.2		2.21	1.03							2.41				INAA		4.34	Muncy, H.L., 1979. Geologic history and petrogenesis of alkaline volcanic rocks, Mount Morning, Antarctica, MSc thesis (Geology), Ohio State University, Columbus, p. 112 pp.	XRF				908						9
Mount Morning Volcanic Field	Mount Morning	Gandalf Ridge		Trachyandesite	77m17							Muncy, H.L., 1979. Geologic history and petrogenesis of alkaline volcanic rocks, Mount Morning, Antarctica, MSc thesis (Geology), Ohio State University, Columbus, p. 112 pp.	XRF	51.87	2.42	14.95	6.83	4.2	0.25	1.97	6.45		2.29	1.02							2.67				INAA		4.55	Muncy, H.L., 1979. Geologic history and petrogenesis of alkaline volcanic rocks, Mount Morning, Antarctica, MSc thesis (Geology), Ohio State University, Columbus, p. 112 pp.	XRF				891				5		14
Mount Morning Volcanic Field	Mount Morning	Gandalf Ridge		Comendite Trachyte	77m40							Muncy, H.L., 1979. Geologic history and petrogenesis of alkaline volcanic rocks, Mount Morning, Antarctica, MSc thesis (Geology), Ohio State University, Columbus, p. 112 pp.	XRF	61.42	0.57	13.86	6.41	0.48	0.27	0.22	2.14		5.2	0.08							3.79				INAA		5.25	Muncy, H.L., 1979. Geologic history and petrogenesis of alkaline volcanic rocks, Mount Morning, Antarctica, MSc thesis (Geology), Ohio State University, Columbus, p. 112 pp.	XRF				122						7
Mount Morning Volcanic Field	Mount Morning	Gandalf Ridge		Comendite Trachyte	77m4		17.23	0.21	Kyle, P.R. and Muncy, H.L., 1989. Geology and geochronology of McMurdo Volcanic Group rocks in the vicinity of Lake Morning, McMurdo Sound, Antarctica. Antarct. Sci., 1: 345 - 350.			Muncy, H.L., 1979. Geologic history and petrogenesis of alkaline volcanic rocks, Mount Morning, Antarctica, MSc thesis (Geology), Ohio State University, Columbus, p. 112 pp.	XRF	62.11	0.49	13.97	6.43	0.8	0.23	0.2	1.25		4.96	0.06							2.28				INAA		6.18	Muncy, H.L., 1979. Geologic history and petrogenesis of alkaline volcanic rocks, Mount Morning, Antarctica, MSc thesis (Geology), Ohio State University, Columbus, p. 112 pp.	XRF				133				2		10
Mount Morning Volcanic Field	Mount Morning	Gandalf Ridge		Comendite Trachyte	77m5							Muncy, H.L., 1979. Geologic history and petrogenesis of alkaline volcanic rocks, Mount Morning, Antarctica, MSc thesis (Geology), Ohio State University, Columbus, p. 112 pp.	XRF	62.26	0.56	14.08	6.98	0.32	0.28	0.22	1.36		5.08	0.08							2.38				INAA		5.88	Muncy, H.L., 1979. Geologic history and petrogenesis of alkaline volcanic rocks, Mount Morning, Antarctica, MSc thesis (Geology), Ohio State University, Columbus, p. 112 pp.	XRF				118				2		10
Mount Morning Volcanic Field	Mount Morning	Gandalf Ridge	Comendite Trachyte		77m35							Muncy, H.L., 1979. Geologic history and petrogenesis of alkaline volcanic rocks, Mount Morning, Antarctica, MSc thesis (Geology), Ohio State University, Columbus, p. 112 pp.	XRF	62.62	0.56	14.45	6.88	0.12	0.23	0.27	1.01		5.49	0.09							2.91				INAA		5.27	Muncy, H.L., 1979. Geologic history and petrogenesis of alkaline volcanic rocks, Mount Morning, Antarctica, MSc thesis (Geology), Ohio State University, Columbus, p. 112 pp.	XRF				145				2		9
Mount Morning Volcanic Field	Mount Morning	Gandalf Ridge		Comendite	77m22							Muncy, H.L., 1979. Geologic history and petrogenesis of alkaline volcanic rocks, Mount Morning, Antarctica, MSc thesis (Geology), Ohio State University, Columbus, p. 112 pp.	XRF	62.65	0.58	12.96	7.42	0.96	0.33	0.78	0.32		6.9	0.07							2.43				INAA		3.93	Muncy, H.L., 1979. Geologic history and petrogenesis of alkaline volcanic rocks, Mount Morning, Antarctica, MSc thesis (Geology), Ohio State University, Columbus, p. 112 pp.	XRF				40				3		9
Mount Morning Volcanic Field	Mount Morning	Gandalf Ridge		Comendite Trachyte	77m30							Muncy, H.L., 1979. Geologic history and petrogenesis of alkaline volcanic rocks, Mount Morning, Antarctica, MSc thesis (Geology), Ohio State University, Columbus, p. 112 pp.	XRF	62.72	0.44	13.95	5.91	0.4	0.15	0.11	2.06		5.1	0.03							2.69				INAA		6.35	Muncy, H.L., 1979. Geologic history and petrogenesis of alkaline volcanic rocks, Mount Morning, Antarctica, MSc thesis (Geology), Ohio State University, Columbus, p. 112 pp.	XRF				8				4		7
Mount Morning Volcanic Field	Mount Morning	Gandalf Ridge		Pantellerite	77m1							Muncy, H.L., 1979. Geologic history and petrogenesis of alkaline volcanic rocks, Mount Morning, Antarctica, MSc thesis (Geology), Ohio State University, Columbus, p. 112 pp.	XRF	62.79	0.58	11.8	9.16	0.92	0.35	0.13	0.88		4.52	0.01							1.69				INAA		6.4	Muncy, H.L., 1979. Geologic history and petrogenesis of alkaline volcanic rocks, Mount Morning, Antarctica, MSc thesis (Geology), Ohio State University, Columbus, p. 112 pp.	XRF				39				5		7
Mount Morning Volcanic Field	Mount Morning	Gandalf Ridge		Comendite (clasts)	77m47							Muncy, H.L., 1979. Geologic history and petrogenesis of alkaline volcanic rocks, Mount Morning, Antarctica, MSc thesis (Geology), Ohio State University, Columbus, p. 112 pp.	XRF	62.82	0.78	13	5.07	2.8	0.24	0.26	0.98		4.4	0.04							3.4				INAA		5.86	Muncy, H.L., 1979. Geologic history and petrogenesis of alkaline volcanic rocks, Mount Morning, Antarctica, MSc thesis (Geology), Ohio State University, Columbus, p. 112 pp.	XRF				67						6
Mount Morning Volcanic Field	Mount Morning	Gandalf Ridge		Pantellerite	77m15							Muncy, H.L., 1979. Geologic history and petrogenesis of alkaline volcanic rocks, Mount Morning, Antarctica, MSc thesis (Geology), Ohio State University, Columbus, p. 112 pp.	XRF	63.44	0.56	12.27	7.41	1.08	0.33	0.08	1.33		4.61	0.06							2.27				INAA		6.15	Muncy, H.L., 1979. Geologic history and petrogenesis of alkaline volcanic rocks, Mount Morning, Antarctica, MSc thesis (Geology), Ohio State University, Columbus, p. 112 pp.	XRF				41				3		7
Mount Morning Volcanic Field	Mount Morning	Gandalf Ridge		Pantellerite	77m27							Muncy, H.L., 1979. Geologic history and petrogenesis of alkaline volcanic rocks, Mount Morning, Antarctica, MSc thesis (Geology), Ohio State University, Columbus, p. 112 pp.	XRF	63.53	0.56	12.5	7.99	0.8	0.31	0.11	0.45		4.65	0.08							1.9				INAA		6.37	Muncy, H.L., 1979. Geologic history and petrogenesis of alkaline volcanic rocks, Mount Morning, Antarctica, MSc thesis (Geology), Ohio State University, Columbus, p. 112 pp.	XRF				58				2		6
Mount Morning Volcanic Field	Mount Morning	Gandalf Ridge		Comendite	77m36							Muncy, H.L., 1979. Geologic history and petrogenesis of alkaline volcanic rocks, Mount Morning, Antarctica, MSc thesis (Geology), Ohio State University, Columbus, p. 112 pp.	XRF	63.59	0.46	12.86	7.24	0.2	0.29	0.16	1.18		5.15	0.02							3.17				INAA		5.32	Muncy, H.L., 1979. Geologic history and petrogenesis of alkaline volcanic rocks, Mount Morning, Antarctica, MSc thesis (Geology), Ohio State University, Columbus, p. 112 pp.	XRF				65						7
Mount Morning Volcanic Field	Mount Morning	Gandalf Ridge		Comendite	77m38							Muncy, H.L., 1979. Geologic history and petrogenesis of alkaline volcanic rocks, Mount Morning, Antarctica, MSc thesis (Geology), Ohio State University, Columbus, p. 112 pp.	XRF	63.6	0.58	13.67	7.23	0.16	0.24	0.1	0.56		7.24	0.08							2.25				INAA		3.55	Muncy, H.L., 1979. Geologic history and petrogenesis of alkaline volcanic rocks, Mount Morning, Antarctica, MSc thesis (Geology), Ohio State University, Columbus, p. 112 pp.	XRF				176						10
Mount Morning Volcanic Field	Mount Morning	Gandalf Ridge		Quartz Trachyte	77m39							Muncy, H.L., 1979. Geologic history and petrogenesis of alkaline volcanic rocks, Mount Morning, Antarctica, MSc thesis (Geology), Ohio State University, Columbus, p. 112 pp.	XRF	63.72	0.75	12.81	8.72	0.04	0.2	0.36	0.36		6.31	0.05							4.08				INAA		2.47	Muncy, H.L., 1979. Geologic history and petrogenesis of alkaline volcanic rocks, Mount Morning, Antarctica, MSc thesis (Geology), Ohio State University, Columbus, p. 112 pp.	XRF				77						10
Mount Morning Volcanic Field	Mount Morning	Gandalf Ridge		Comendite	77m37							Muncy, H.L., 1979. Geologic history and petrogenesis of alkaline volcanic rocks, Mount Morning, Antarctica, MSc thesis (Geology), Ohio State University, Columbus, p. 112 pp.	XRF	63.83	0.56	12.75	8.28	0.24	0.32	0.07	1.03		4.92	0.02							2.06				INAA		5.44	Muncy, H.L., 1979. Geologic history and petrogenesis of alkaline volcanic rocks, Mount Morning, Antarctica, MSc thesis (Geology), Ohio State University, Columbus, p. 112 pp.	XRF				38						8
Mount Morning Volcanic Field	Mount Morning	Gandalf Ridge		Comendite (clasts)	77m50							Muncy, H.L., 1979. Geologic history and petrogenesis of alkaline volcanic rocks, Mount Morning, Antarctica, MSc thesis (Geology), Ohio State University, Columbus, p. 112 pp.	XRF	63.93	0.45	13.9	5.7	1.48	0.24	0.04	1.37		4.47	0.02							1.81				INAA		6.06	Muncy, H.L., 1979. Geologic history and petrogenesis of alkaline volcanic rocks, Mount Morning, Antarctica, MSc thesis (Geology), Ohio State University, Columbus, p. 112 pp.	XRF				180						9
Mount Morning Volcanic Field	Mount Morning	Gandalf Ridge		Comendite	77m45		17.56	0.56	Kyle, P.R. and Muncy, H.L., 1989. Geology and geochronology of McMurdo Volcanic Group rocks in the vicinity of Lake Morning, McMurdo Sound, Antarctica. Antarct. Sci., 1: 345 - 350.			Muncy, H.L., 1979. Geologic history and petrogenesis of alkaline volcanic rocks, Mount Morning, Antarctica, MSc thesis (Geology), Ohio State University, Columbus, p. 112 pp.	XRF	64.28	0.56	14.52	4.72	2	0.15	0.12	0.44		5.25	0.06							1.34				INAA		5.86	Muncy, H.L., 1979. Geologic history and petrogenesis of alkaline volcanic rocks, Mount Morning, Antarctica, MSc thesis (Geology), Ohio State University, Columbus, p. 112 pp.	XRF				47						8
Mount Morning Volcanic Field	Mount Morning	Gandalf Ridge		Comendite	77m34							Muncy, H.L., 1979. Geologic history and petrogenesis of alkaline volcanic rocks, Mount Morning, Antarctica, MSc thesis (Geology), Ohio State University, Columbus, p. 112 pp.	XRF	64.31	0.51	13.2	7.12	0.52	0.18	0.2	0.33		5.11	0.04							1.98				INAA		6.07	Muncy, H.L., 1979. Geologic history and petrogenesis of alkaline volcanic rocks, Mount Morning, Antarctica, MSc thesis (Geology), Ohio State University, Columbus, p. 112 pp.	XRF				54				2		10
Mount Morning Volcanic Field	Mount Morning	Gandalf Ridge		Comendite Trachyte	77m44							Muncy, H.L., 1979. Geologic history and petrogenesis of alkaline volcanic rocks, Mount Morning, Antarctica, MSc thesis (Geology), Ohio State University, Columbus, p. 112 pp.	XRF	64.38	0.64	15.43	2.88	1.2	0.11	0.28	1.03		5.14	0.09							2.12				INAA		6.3	Muncy, H.L., 1979. Geologic history and petrogenesis of alkaline volcanic rocks, Mount Morning, Antarctica, MSc thesis (Geology), Ohio State University, Columbus, p. 112 pp.	XRF				148						8
Mount Morning Volcanic Field	Mount Morning	Gandalf Ridge		Quartz Trachyte	77m33							Muncy, H.L., 1979. Geologic history and petrogenesis of alkaline volcanic rocks, Mount Morning, Antarctica, MSc thesis (Geology), Ohio State University, Columbus, p. 112 pp.	XRF	64.43	0.46	12.97	6.86	0.08	0.28	0.26	1.16		5.18	0.06							3.85				INAA		4.03	Muncy, H.L., 1979. Geologic history and petrogenesis of alkaline volcanic rocks, Mount Morning, Antarctica, MSc thesis (Geology), Ohio State University, Columbus, p. 112 pp.	XRF				56				4		7
Mount Morning Volcanic Field	Mount Morning	Gandalf Ridge		Comendite Trachyte	77m62		16.79	0.27	Kyle, P.R. and Muncy, H.L., 1989. Geology and geochronology of McMurdo Volcanic Group rocks in the vicinity of Lake Morning, McMurdo Sound, Antarctica. Antarct. Sci., 1: 345 - 350.			Muncy, H.L., 1979. Geologic history and petrogenesis of alkaline volcanic rocks, Mount Morning, Antarctica, MSc thesis (Geology), Ohio State University, Columbus, p. 112 pp.	XRF	64.45	0.47	13.61	2.78	2.36	0.09	0.15	1.4		4.91	0.02							2.72				INAA		6.03	Muncy, H.L., 1979. Geologic history and petrogenesis of alkaline volcanic rocks, Mount Morning, Antarctica, MSc thesis (Geology), Ohio State University, Columbus, p. 112 pp.	XRF				6						6
Mount Morning Volcanic Field	Mount Morning	Gandalf Ridge		Quartz Trachyte	77m23		18.73	0.32	Kyle, P.R. and Muncy, H.L., 1989. Geology and geochronology of McMurdo Volcanic Group rocks in the vicinity of Lake Morning, McMurdo Sound, Antarctica. Antarct. Sci., 1: 345 - 350.			Muncy, H.L., 1979. Geologic history and petrogenesis of alkaline volcanic rocks, Mount Morning, Antarctica, MSc thesis (Geology), Ohio State University, Columbus, p. 112 pp.	XRF	65.3	0.56	12.5	7.09	0.06	0.29	0.24	0.68		4.56	0.01							3.32				INAA		3.96	Muncy, H.L., 1979. Geologic history and petrogenesis of alkaline volcanic rocks, Mount Morning, Antarctica, MSc thesis (Geology), Ohio State University, Columbus, p. 112 pp.	XRF				138						10
Mount Morning Volcanic Field	Mount Morning	Gandalf Ridge		Quartz Trachyte (clasts)	77m60							Muncy, H.L., 1979. Geologic history and petrogenesis of alkaline volcanic rocks, Mount Morning, Antarctica, MSc thesis (Geology), Ohio State University, Columbus, p. 112 pp.	XRF	65.4	0.43	14.28	5.1	0.72	0.12	0.11	1.23		4.97	0.01							2.08				INAA		5.15	Muncy, H.L., 1979. Geologic history and petrogenesis of alkaline volcanic rocks, Mount Morning, Antarctica, MSc thesis (Geology), Ohio State University, Columbus, p. 112 pp.	XRF				14						9
Mount Morning Volcanic Field	Mount Morning	Gandalf Ridge		Quartz Trachyte (clasts)	77m58							Muncy, H.L., 1979. Geologic history and petrogenesis of alkaline volcanic rocks, Mount Morning, Antarctica, MSc thesis (Geology), Ohio State University, Columbus, p. 112 pp.	XRF	65.87	0.4	13.37	6.11	0.68	0.15	0.07	0.95		4.74	0.02							1.96				INAA		4.71	Muncy, H.L., 1979. Geologic history and petrogenesis of alkaline volcanic rocks, Mount Morning, Antarctica, MSc thesis (Geology), Ohio State University, Columbus, p. 112 pp.	XRF				29						9
Mount Morning Volcanic Field	Mount Morning	Gandalf Ridge		Comendite (clasts)	77m61							Muncy, H.L., 1979. Geologic history and petrogenesis of alkaline volcanic rocks, Mount Morning, Antarctica, MSc thesis (Geology), Ohio State University, Columbus, p. 112 pp.	XRF	67.01	0.41	13.34	5.06	1.4	0.15	0.07	0.82		4.66	0.01							1.07				INAA		5.22	Muncy, H.L., 1979. Geologic history and petrogenesis of alkaline volcanic rocks, Mount Morning, Antarctica, MSc thesis (Geology), Ohio State University, Columbus, p. 112 pp.	XRF				28						9
Mount Morning Volcanic Field	Mount Morning	Gandalf Ridge		Quartz Trachyte	77m26							Muncy, H.L., 1979. Geologic history and petrogenesis of alkaline volcanic rocks, Mount Morning, Antarctica, MSc thesis (Geology), Ohio State University, Columbus, p. 112 pp.	XRF	67.77	0.57	10.11	10.04	0.26	0.26	0.13	1.17		3.35	0.03							2.08				INAA		3.66	Muncy, H.L., 1979. Geologic history and petrogenesis of alkaline volcanic rocks, Mount Morning, Antarctica, MSc thesis (Geology), Ohio State University, Columbus, p. 112 pp.	XRF				111				3		11
Mount Morning Volcanic Field	Mount Morning	Gandalf Ridge		Quartz Trachyte	77m20							Muncy, H.L., 1979. Geologic history and petrogenesis of alkaline volcanic rocks, Mount Morning, Antarctica, MSc thesis (Geology), Ohio State University, Columbus, p. 112 pp.	XRF	67.89	0.61	10.73	10.43	0.08	0.33	0.18	0.62		3.29	0.03							1.91				INAA		3.62	Muncy, H.L., 1979. Geologic history and petrogenesis of alkaline volcanic rocks, Mount Morning, Antarctica, MSc thesis (Geology), Ohio State University, Columbus, p. 112 pp.	XRF				175				3		79
Mount Morning Volcanic Field	Mount Morning	Gandalf Ridge		Pantellerite	77m32							Muncy, H.L., 1979. Geologic history and petrogenesis of alkaline volcanic rocks, Mount Morning, Antarctica, MSc thesis (Geology), Ohio State University, Columbus, p. 112 pp.	XRF	67.9	0.6	11.65	5.46	0.44	0.12	0.06	0.61		5.53	0.02							1.92				INAA		5.46	Muncy, H.L., 1979. Geologic history and petrogenesis of alkaline volcanic rocks, Mount Morning, Antarctica, MSc thesis (Geology), Ohio State University, Columbus, p. 112 pp.	XRF				52				2		5
Mount Morning Volcanic Field	Mount Morning	Gandalf Ridge		Quartz Trachyte (clasts)	77m57							Muncy, H.L., 1979. Geologic history and petrogenesis of alkaline volcanic rocks, Mount Morning, Antarctica, MSc thesis (Geology), Ohio State University, Columbus, p. 112 pp.	XRF	69.67	0.38	13.14	5.53	0.08	0.16	0.11	0.75		2.32	0.02							1.8				INAA		5.92	Muncy, H.L., 1979. Geologic history and petrogenesis of alkaline volcanic rocks, Mount Morning, Antarctica, MSc thesis (Geology), Ohio State University, Columbus, p. 112 pp.	XRF				9						9
Mount Morning Volcanic Field	Mount Morning	Hurricane Ridge		Basanite	OU77025							Sullivan, R.J., 2006. The geology and geochemistry of Seal Crater, Hurricane Ridge, Mount Morning, Antarctica, University of Otago, Dunedin, 138 pp.	XRF	41.01	4.85	12.99	15.94		0.22	9.9	11.51	3.2	1.18	0.88									-0.35					Sullivan, R.J., 2006. The geology and geochemistry of Seal Crater, Hurricane Ridge, Mount Morning, Antarctica, University of Otago, Dunedin, 138 pp.	XRF		bdl		534		84		350		47
Mount Morning Volcanic Field	Mount Morning	Hurricane Ridge		Basanite	OU77023							Sullivan, R.J., 2006. The geology and geochemistry of Seal Crater, Hurricane Ridge, Mount Morning, Antarctica, University of Otago, Dunedin, 138 pp.	XRF	41.03	4.62	13.2	15.6		0.21	9.8	11.47	3.15	1.12	0.86									0.23					Sullivan, R.J., 2006. The geology and geochemistry of Seal Crater, Hurricane Ridge, Mount Morning, Antarctica, University of Otago, Dunedin, 138 pp.	XRF		1		492		85		345		44
Mount Morning Volcanic Field	Mount Morning	Hurricane Ridge		Basanite	OU77037							Sullivan, R.J., 2006. The geology and geochemistry of Seal Crater, Hurricane Ridge, Mount Morning, Antarctica, University of Otago, Dunedin, 138 pp.	XRF	41.1	4.91	13.01	16.13		0.23	9.84	11.55	3.17	1.08	0.85									-0.46					Sullivan, R.J., 2006. The geology and geochemistry of Seal Crater, Hurricane Ridge, Mount Morning, Antarctica, University of Otago, Dunedin, 138 pp.	XRF		1		518		82		384		48
Mount Morning Volcanic Field	Mount Morning	Hurricane Ridge		Basanite	OU77022							Sullivan, R.J., 2006. The geology and geochemistry of Seal Crater, Hurricane Ridge, Mount Morning, Antarctica, University of Otago, Dunedin, 138 pp.	XRF	41.24	4.66	13.23	15.56		0.21	9.62	11.6	3	1.05	0.92									0.16					Sullivan, R.J., 2006. The geology and geochemistry of Seal Crater, Hurricane Ridge, Mount Morning, Antarctica, University of Otago, Dunedin, 138 pp.	XRF		bdl		558		88		285		43
Mount Morning Volcanic Field	Mount Morning	Hurricane Ridge		Basanite	OU77034							Sullivan, R.J., 2006. The geology and geochemistry of Seal Crater, Hurricane Ridge, Mount Morning, Antarctica, University of Otago, Dunedin, 138 pp.	XRF	41.24	4.8	13.16	15.93		0.21	9.81	11.54	3.1	1.03	0.82									-0.48					Sullivan, R.J., 2006. The geology and geochemistry of Seal Crater, Hurricane Ridge, Mount Morning, Antarctica, University of Otago, Dunedin, 138 pp.	XRF		2		501		78		330		56
Mount Morning Volcanic Field	Mount Morning	Hurricane Ridge		Basanite	OU77021							Sullivan, R.J., 2006. The geology and geochemistry of Seal Crater, Hurricane Ridge, Mount Morning, Antarctica, University of Otago, Dunedin, 138 pp.	XRF	41.35	4.57	13.2	15.47		0.21	9.8	11.73	2.92	1.08	0.89									0.07					Sullivan, R.J., 2006. The geology and geochemistry of Seal Crater, Hurricane Ridge, Mount Morning, Antarctica, University of Otago, Dunedin, 138 pp.	XRF		bdl		521		83		361		48
Mount Morning Volcanic Field	Mount Morning	Hurricane Ridge		Basanite	OU77042							Sullivan, R.J., 2006. The geology and geochemistry of Seal Crater, Hurricane Ridge, Mount Morning, Antarctica, University of Otago, Dunedin, 138 pp.	XRF	41.55	3.945	13.335	13.98		0.21	9.995	11.61	3.82	0.96	0.975									0.58					Sullivan, R.J., 2006. The geology and geochemistry of Seal Crater, Hurricane Ridge, Mount Morning, Antarctica, University of Otago, Dunedin, 138 pp.	XRF		bdl		552		104		370		46
Mount Morning Volcanic Field	Mount Morning	Hurricane Ridge		Basanite	OU77011							Sullivan, R.J., 2006. The geology and geochemistry of Seal Crater, Hurricane Ridge, Mount Morning, Antarctica, University of Otago, Dunedin, 138 pp.	XRF	41.76	4.38	13.17	15.13		0.21	10.29	11.71	3.39	1.02	0.88									-0.64					Sullivan, R.J., 2006. The geology and geochemistry of Seal Crater, Hurricane Ridge, Mount Morning, Antarctica, University of Otago, Dunedin, 138 pp.	XRF		1		567		93		358.5		48.5
Mount Morning Volcanic Field	Mount Morning	Hurricane Ridge		Basanite	OU77019							Sullivan, R.J., 2006. The geology and geochemistry of Seal Crater, Hurricane Ridge, Mount Morning, Antarctica, University of Otago, Dunedin, 138 pp.	XRF	41.79	4.395	13.23	15.155		0.21	10.06	11.655	3.235	1.085	0.88									-0.29					Sullivan, R.J., 2006. The geology and geochemistry of Seal Crater, Hurricane Ridge, Mount Morning, Antarctica, University of Otago, Dunedin, 138 pp.	XRF		bdl		575		92		358		68
Mount Morning Volcanic Field	Mount Morning	Hurricane Ridge		Basanite	OU77041							Sullivan, R.J., 2006. The geology and geochemistry of Seal Crater, Hurricane Ridge, Mount Morning, Antarctica, University of Otago, Dunedin, 138 pp.	XRF	41.98	3.99	13.33	14.27		0.21	10.36	11.785	3.53	1.22	0.955									-0.35					Sullivan, R.J., 2006. The geology and geochemistry of Seal Crater, Hurricane Ridge, Mount Morning, Antarctica, University of Otago, Dunedin, 138 pp.	XRF		1		626		97		323		51
Mount Morning Volcanic Field	Mount Morning	Hurricane Ridge		Basanite	OU77015							Sullivan, R.J., 2006. The geology and geochemistry of Seal Crater, Hurricane Ridge, Mount Morning, Antarctica, University of Otago, Dunedin, 138 pp.	XRF	42.25	4.25	13.97	14.42		0.21	9.39	11.68	3.09	1.26	0.97									0.58					Sullivan, R.J., 2006. The geology and geochemistry of Seal Crater, Hurricane Ridge, Mount Morning, Antarctica, University of Otago, Dunedin, 138 pp.	XRF		1		621		102		266		42
Mount Morning Volcanic Field	Mount Morning	Hurricane Ridge		Basanite	OU77017							Sullivan, R.J., 2006. The geology and geochemistry of Seal Crater, Hurricane Ridge, Mount Morning, Antarctica, University of Otago, Dunedin, 138 pp.	XRF	42.3	3.94	13.65	14.02		0.2	10.115	11.845	3.44	1.23	0.92									-0.48					Sullivan, R.J., 2006. The geology and geochemistry of Seal Crater, Hurricane Ridge, Mount Morning, Antarctica, University of Otago, Dunedin, 138 pp.	XRF		2		581		99		318		53
Mount Morning Volcanic Field	Mount Morning	Hurricane Ridge		Basanite	OU77013							Sullivan, R.J., 2006. The geology and geochemistry of Seal Crater, Hurricane Ridge, Mount Morning, Antarctica, University of Otago, Dunedin, 138 pp.	XRF	42.45	4.31	14.23	14.44		0.2	9.26	11.66	3.37	1.06	0.93									-0.35					Sullivan, R.J., 2006. The geology and geochemistry of Seal Crater, Hurricane Ridge, Mount Morning, Antarctica, University of Otago, Dunedin, 138 pp.	XRF		bdl		557		92		277		80
Mount Morning Volcanic Field	Mount Morning	Hurricane Ridge		Basanite	OU77032							Sullivan, R.J., 2006. The geology and geochemistry of Seal Crater, Hurricane Ridge, Mount Morning, Antarctica, University of Otago, Dunedin, 138 pp.	XRF	44.76	3.21	14.46	13.41		0.22	9.2	9.75	3.95	1.49	0.73									-0.04					Sullivan, R.J., 2006. The geology and geochemistry of Seal Crater, Hurricane Ridge, Mount Morning, Antarctica, University of Otago, Dunedin, 138 pp.	XRF		1		659		103		480		39
Mount Morning Volcanic Field	Mount Morning	Hurricane Ridge		Basanite	OU77027							Sullivan, R.J., 2006. The geology and geochemistry of Seal Crater, Hurricane Ridge, Mount Morning, Antarctica, University of Otago, Dunedin, 138 pp.	XRF	45.545	3.09	14.79	13.075		0.21	8.93	9.435	4.115	1.795	0.68									-0.63					Sullivan, R.J., 2006. The geology and geochemistry of Seal Crater, Hurricane Ridge, Mount Morning, Antarctica, University of Otago, Dunedin, 138 pp.	XRF		1		618		99		409		35
Mount Morning Volcanic Field	Mount Morning	Hurricane Ridge		Basanite	OU77038							Sullivan, R.J., 2006. The geology and geochemistry of Seal Crater, Hurricane Ridge, Mount Morning, Antarctica, University of Otago, Dunedin, 138 pp.	XRF	45.545	3.145	14.825	13.155		0.22	8.795	9.59	4.125	1.79	0.69									-0.65					Sullivan, R.J., 2006. The geology and geochemistry of Seal Crater, Hurricane Ridge, Mount Morning, Antarctica, University of Otago, Dunedin, 138 pp.	XRF		1		649		101.5		377.5		34.5
Mount Morning Volcanic Field	Mount Morning	Hurricane Ridge		Basanite	OU77026		0.15	0.01	Martin, A.P., Cooper, A.F. and Dunlap, W.J., 2010. Geochronology of Mount Morning, Antarctica: Two-phase evolution of a long-lived trachyte-basanite-phonolite eruptive center. Bull. Volcanol., 72: 357-371, doi: 310.1007/s00445-00009-00319-00441.			Sullivan, R.J., 2006. The geology and geochemistry of Seal Crater, Hurricane Ridge, Mount Morning, Antarctica, University of Otago, Dunedin, 138 pp.	XRF	45.61	3.11	14.8	13.12		0.21	8.94	9.51	4.15	1.79	0.68									-0.63					Sullivan, R.J., 2006. The geology and geochemistry of Seal Crater, Hurricane Ridge, Mount Morning, Antarctica, University of Otago, Dunedin, 138 pp.	XRF		1		604		97		413		35
Mount Morning Volcanic Field	Mount Morning	Hurricane Ridge		Phonolite	OU78218	RDB 2	5.01	0.04	Martin, A.P., Cooper, A.F. and Dunlap, W.J., 2010. Geochronology of Mount Morning, Antarctica: Two-phase evolution of a long-lived trachyte-basanite-phonolite eruptive center. Bull. Volcanol., 72: 357-371, doi: 310.1007/s00445-00009-00319-00441.			Paulsen, H.-K., 2008. A lithological cross section through Mount Morning, Antarctica: A story told from xenolithic assemblages in a pyroclastic deposit, MSc thesis (Geology), University of Otago, Dunedin, p. 179 pp.	XRF	59.12	0.53	18.64	5.18		0.21	0.6	1.77	8.03	5.08	0.19									1.03					Paulsen, H.-K., 2008. A lithological cross section through Mount Morning, Antarctica: A story told from xenolithic assemblages in a pyroclastic deposit, MSc thesis (Geology), University of Otago, Dunedin, p. 179 pp.	XRF		6		441		126	46	bdl		bdl
Mount Morning Volcanic Field	Mount Morning	MM1			AW86124							Wright-Grassham, A.C., 1987. Volcanic geology, mineralogy, and petrogenesis of the Discovery Volcanic Subprovince, Southern Victoria Land, Antarctica - PhD Thesis, New Mexico Institute of Mining and Technology, 460 pp.	XRF	48.38	2.68	16.98		9.86	0.22	5.28	7.53	5.61	2.17	0.76									-0.41					Wright-Grassham, A.C., 1987. Volcanic geology, mineralogy, and petrogenesis of the Discovery Volcanic Subprovince, Southern Victoria Land, Antarctica - PhD Thesis, New Mexico Institute of Mining and Technology, 460 pp.	XRF				531				96		18
Mount Morning Volcanic Field	Mount Morning	MM1			AW86122							Wright-Grassham, A.C., 1987. Volcanic geology, mineralogy, and petrogenesis of the Discovery Volcanic Subprovince, Southern Victoria Land, Antarctica - PhD Thesis, New Mexico Institute of Mining and Technology, 460 pp.	XRF	48.9	2.83	17.64		9.33	0.21	3.85	7.82	5.53	2.56	0.67									-0.44					Wright-Grassham, A.C., 1987. Volcanic geology, mineralogy, and petrogenesis of the Discovery Volcanic Subprovince, Southern Victoria Land, Antarctica - PhD Thesis, New Mexico Institute of Mining and Technology, 460 pp.	XRF				649				28		bdl
Mount Morning Volcanic Field	Mount Morning	MM1			AW86121							Wright-Grassham, A.C., 1987. Volcanic geology, mineralogy, and petrogenesis of the Discovery Volcanic Subprovince, Southern Victoria Land, Antarctica - PhD Thesis, New Mexico Institute of Mining and Technology, 460 pp.	XRF	50.89	2.27	18.21		8.04	0.2	2.71	6.4	5.89	3.29	0.7									0.32		INAA	7.99		Wright-Grassham, A.C., 1987. Volcanic geology, mineralogy, and petrogenesis of the Discovery Volcanic Subprovince, Southern Victoria Land, Antarctica - PhD Thesis, New Mexico Institute of Mining and Technology, 460 pp.	XRF				894		136		26	0.77	bdl
Mount Morning Volcanic Field	Mount Morning	MM1			AW86128							Wright-Grassham, A.C., 1987. Volcanic geology, mineralogy, and petrogenesis of the Discovery Volcanic Subprovince, Southern Victoria Land, Antarctica - PhD Thesis, New Mexico Institute of Mining and Technology, 460 pp.	XRF	56.03	0.11	19.67		5.19	0.36	0.33	0.84	10.5	5.27	0.05									0.64		INAA	5.32		Wright-Grassham, A.C., 1987. Volcanic geology, mineralogy, and petrogenesis of the Discovery Volcanic Subprovince, Southern Victoria Land, Antarctica - PhD Thesis, New Mexico Institute of Mining and Technology, 460 pp.	XRF				bdl		288		10	3.68	bdl
Mount Morning Volcanic Field	Mount Morning	MM1			AW86127							Wright-Grassham, A.C., 1987. Volcanic geology, mineralogy, and petrogenesis of the Discovery Volcanic Subprovince, Southern Victoria Land, Antarctica - PhD Thesis, New Mexico Institute of Mining and Technology, 460 pp.	XRF	57.97	0.5	19.58		4.23	0.21	0.57	2	8.48	5.09	0.14									0.26		INAA	4.38		Wright-Grassham, A.C., 1987. Volcanic geology, mineralogy, and petrogenesis of the Discovery Volcanic Subprovince, Southern Victoria Land, Antarctica - PhD Thesis, New Mexico Institute of Mining and Technology, 460 pp.	XRF				462		178		29	1.69	bdl
Mount Morning Volcanic Field	Mount Morning	MM1			AW86123							Wright-Grassham, A.C., 1987. Volcanic geology, mineralogy, and petrogenesis of the Discovery Volcanic Subprovince, Southern Victoria Land, Antarctica - PhD Thesis, New Mexico Institute of Mining and Technology, 460 pp.	XRF	59.14	0.63	19.34		4.18	0.17	0.65	2.31	7.66	5.17	0.14									-0.05					Wright-Grassham, A.C., 1987. Volcanic geology, mineralogy, and petrogenesis of the Discovery Volcanic Subprovince, Southern Victoria Land, Antarctica - PhD Thesis, New Mexico Institute of Mining and Technology, 460 pp.	XRF				619				bdl		bdl
Mount Morning Volcanic Field	Mount Morning	MM2			AW86057							Wright-Grassham, A.C., 1987. Volcanic geology, mineralogy, and petrogenesis of the Discovery Volcanic Subprovince, Southern Victoria Land, Antarctica - PhD Thesis, New Mexico Institute of Mining and Technology, 460 pp.	XRF	42.37	3.92	16.21		12.94	0.2	6.82	12.1	3.21	1	0.73									-0.52		INAA	13.25		Wright-Grassham, A.C., 1987. Volcanic geology, mineralogy, and petrogenesis of the Discovery Volcanic Subprovince, Southern Victoria Land, Antarctica - PhD Thesis, New Mexico Institute of Mining and Technology, 460 pp.	XRF				401		83.7		86	0.21	21
Mount Morning Volcanic Field	Mount Morning	MM2			AW86096							Wright-Grassham, A.C., 1987. Volcanic geology, mineralogy, and petrogenesis of the Discovery Volcanic Subprovince, Southern Victoria Land, Antarctica - PhD Thesis, New Mexico Institute of Mining and Technology, 460 pp.	XRF	43.5	3.15	13.74		11.23	0.19	9.59	13.53	2.62	0.78	0.48									-0.06					Wright-Grassham, A.C., 1987. Volcanic geology, mineralogy, and petrogenesis of the Discovery Volcanic Subprovince, Southern Victoria Land, Antarctica - PhD Thesis, New Mexico Institute of Mining and Technology, 460 pp.	XRF				278				235		64
Mount Morning Volcanic Field	Mount Morning	MM2			AW86058							Wright-Grassham, A.C., 1987. Volcanic geology, mineralogy, and petrogenesis of the Discovery Volcanic Subprovince, Southern Victoria Land, Antarctica - PhD Thesis, New Mexico Institute of Mining and Technology, 460 pp.	XRF	43.51	3.62	14.39		11.45	0.24	8.94	11.06	3.52	1.58	0.95									-0.92					Wright-Grassham, A.C., 1987. Volcanic geology, mineralogy, and petrogenesis of the Discovery Volcanic Subprovince, Southern Victoria Land, Antarctica - PhD Thesis, New Mexico Institute of Mining and Technology, 460 pp.	XRF				522				312		22
Mount Morning Volcanic Field	Mount Morning	MM2			AW86119							Wright-Grassham, A.C., 1987. Volcanic geology, mineralogy, and petrogenesis of the Discovery Volcanic Subprovince, Southern Victoria Land, Antarctica - PhD Thesis, New Mexico Institute of Mining and Technology, 460 pp.	XRF	43.87	3.29	13.72		11.7	0.2	10.58	11.17	3.24	1.09	0.54									-0.79					Wright-Grassham, A.C., 1987. Volcanic geology, mineralogy, and petrogenesis of the Discovery Volcanic Subprovince, Southern Victoria Land, Antarctica - PhD Thesis, New Mexico Institute of Mining and Technology, 460 pp.	XRF				299				665		38
Mount Morning Volcanic Field	Mount Morning	MM2			AW86120							Wright-Grassham, A.C., 1987. Volcanic geology, mineralogy, and petrogenesis of the Discovery Volcanic Subprovince, Southern Victoria Land, Antarctica - PhD Thesis, New Mexico Institute of Mining and Technology, 460 pp.	XRF	44.06	3.45	15.38		11.48	0.22	7.87	10.77	4.02	1.57	0.88									-0.79					Wright-Grassham, A.C., 1987. Volcanic geology, mineralogy, and petrogenesis of the Discovery Volcanic Subprovince, Southern Victoria Land, Antarctica - PhD Thesis, New Mexico Institute of Mining and Technology, 460 pp.	XRF				438				245		27
Mount Morning Volcanic Field	Mount Morning	MM2			AW86059							Wright-Grassham, A.C., 1987. Volcanic geology, mineralogy, and petrogenesis of the Discovery Volcanic Subprovince, Southern Victoria Land, Antarctica - PhD Thesis, New Mexico Institute of Mining and Technology, 460 pp.	XRF	45.81	3.16	15.82		11.43	0.21	7.36	9.51	4.17	1.44	0.7									-0.58					Wright-Grassham, A.C., 1987. Volcanic geology, mineralogy, and petrogenesis of the Discovery Volcanic Subprovince, Southern Victoria Land, Antarctica - PhD Thesis, New Mexico Institute of Mining and Technology, 460 pp.	XRF				435				227		22
Mount Morning Volcanic Field	Mount Morning	MM2			AW86098							Wright-Grassham, A.C., 1987. Volcanic geology, mineralogy, and petrogenesis of the Discovery Volcanic Subprovince, Southern Victoria Land, Antarctica - PhD Thesis, New Mexico Institute of Mining and Technology, 460 pp.	XRF	46.78	3.32	17		10.34	0.24	4.3	8.35	5.01	2	1.26									0.06					Wright-Grassham, A.C., 1987. Volcanic geology, mineralogy, and petrogenesis of the Discovery Volcanic Subprovince, Southern Victoria Land, Antarctica - PhD Thesis, New Mexico Institute of Mining and Technology, 460 pp.	XRF				649				38		bdl
Mount Morning Volcanic Field	Mount Morning	MM2			AW84715							Wright-Grassham, A.C., 1987. Volcanic geology, mineralogy, and petrogenesis of the Discovery Volcanic Subprovince, Southern Victoria Land, Antarctica - PhD Thesis, New Mexico Institute of Mining and Technology, 460 pp.	XRF	46.85	2.63	16.09		10.48	0.24	6.42	8.49	5.05	2.1	0.83									0.14					Wright-Grassham, A.C., 1987. Volcanic geology, mineralogy, and petrogenesis of the Discovery Volcanic Subprovince, Southern Victoria Land, Antarctica - PhD Thesis, New Mexico Institute of Mining and Technology, 460 pp.	XRF				759		154		148	0.57	28
Mount Morning Volcanic Field	Mount Morning	Mount Morning		Basanitoid	3							Goldich, S., Treves, S., Suhr, N. and Stuckless, J., 1975. Geochemistry of the Cenozoic volcanic rocks of Ross Island and vicinity, Antarctica. The Journal of Geology, 83(4): 415-435.	AAS	42.5	3.12	13.3	3	10	0.2	12.1	10.4	2.85	1.17	0.68	0.04	0.03		0.12			0.13	0.03						Goldich, S., Treves, S., Suhr, N. and Stuckless, J., 1975. Geochemistry of the Cenozoic volcanic rocks of Ross Island and vicinity, Antarctica. The Journal of Geology, 83(4): 415-435.	AAS	1.4			390	2.2	bdl	58	540		37
Mount Morning Volcanic Field	Mount Morning	Pinnacle V.	Mason Spur Lineage	Trachyte	OU78501	7				11.9969	81	Martin, A.P., Cooper, A.F. and Price, R.C., 2013. Petrogenesis of Cenozoic, alkalic volcanic lineages at Mount Morning, West Antarctica and their entrained lithospheric mantle xenoliths: Lithospheric versus asthenospheric mantle sources. Geochim. Cosmochim. Acta, 122(0): 127-152.	XRF	60.17	0.4	15.05	8.43		0.27	0.29	0.74	7.14	4.88	0.09									2.63079	100.091				Martin, A.P., Cooper, A.F. and Price, R.C., 2013. Petrogenesis of Cenozoic, alkalic volcanic lineages at Mount Morning, West Antarctica and their entrained lithospheric mantle xenoliths: Lithospheric versus asthenospheric mantle sources. Geochim. Cosmochim. Acta, 122(0): 127-152.	XRF				11		380	-	bdl
Mount Morning Volcanic Field	Mount Morning	Pinnacle V.	Mason Spur Lineage	Trachyte	OU78505	15				14.2933	90.2	Martin, A.P., Cooper, A.F. and Price, R.C., 2013. Petrogenesis of Cenozoic, alkalic volcanic lineages at Mount Morning, West Antarctica and their entrained lithospheric mantle xenoliths: Lithospheric versus asthenospheric mantle sources. Geochim. Cosmochim. Acta, 122(0): 127-152.	XRF	61.15	0.34	18.14	4.99		0.15	0.21	1.1	6.99	5.57	0.05									1.69	100.38				Martin, A.P., Cooper, A.F. and Price, R.C., 2013. Petrogenesis of Cenozoic, alkalic volcanic lineages at Mount Morning, West Antarctica and their entrained lithospheric mantle xenoliths: Lithospheric versus asthenospheric mantle sources. Geochim. Cosmochim. Acta, 122(0): 127-152.	LA-ICPMS				101.535		169.983	17.9367	21.3319
Mount Morning Volcanic Field	Mount Morning	Pinnacle V.	Mason Spur Lineage	QB-Trachyte	OU78507	18				11.033	85.4	Martin, A.P., Cooper, A.F. and Price, R.C., 2013. Petrogenesis of Cenozoic, alkalic volcanic lineages at Mount Morning, West Antarctica and their entrained lithospheric mantle xenoliths: Lithospheric versus asthenospheric mantle sources. Geochim. Cosmochim. Acta, 122(0): 127-152.	XRF	62.59	0.39	15.7	7.03		0.13	0.22	1	6.75	5.1	0.05									1.41	100.37				Martin, A.P., Cooper, A.F. and Price, R.C., 2013. Petrogenesis of Cenozoic, alkalic volcanic lineages at Mount Morning, West Antarctica and their entrained lithospheric mantle xenoliths: Lithospheric versus asthenospheric mantle sources. Geochim. Cosmochim. Acta, 122(0): 127-152.	XRF				11		334	-	bdl
Mount Morning Volcanic Field	Mount Morning	Pinnacle V.	Mason Spur Lineage	QB-Trachyte	OU78512	6B/				30.8463	86.3	Martin, A.P., Cooper, A.F. and Price, R.C., 2013. Petrogenesis of Cenozoic, alkalic volcanic lineages at Mount Morning, West Antarctica and their entrained lithospheric mantle xenoliths: Lithospheric versus asthenospheric mantle sources. Geochim. Cosmochim. Acta, 122(0): 127-152.	XRF	62.62	0.47	15.46	6.13		0.21	0.69	1.17	5.32	5.27	0.07									3.01	100.42				Martin, A.P., Cooper, A.F. and Price, R.C., 2013. Petrogenesis of Cenozoic, alkalic volcanic lineages at Mount Morning, West Antarctica and their entrained lithospheric mantle xenoliths: Lithospheric versus asthenospheric mantle sources. Geochim. Cosmochim. Acta, 122(0): 127-152.	XRF				74		265	-	0
Mount Morning Volcanic Field	Mount Morning	Pinnacle V.	Mason Spur Lineage	QB-Trachyte	OU78510	6A				18.27	87.1	Martin, A.P., Cooper, A.F. and Price, R.C., 2013. Petrogenesis of Cenozoic, alkalic volcanic lineages at Mount Morning, West Antarctica and their entrained lithospheric mantle xenoliths: Lithospheric versus asthenospheric mantle sources. Geochim. Cosmochim. Acta, 122(0): 127-152.	XRF	64.34	0.51	15.08	5.85		0.18	0.33	1.3	5.05	5.16	0.08									2.64	100.52				Martin, A.P., Cooper, A.F. and Price, R.C., 2013. Petrogenesis of Cenozoic, alkalic volcanic lineages at Mount Morning, West Antarctica and their entrained lithospheric mantle xenoliths: Lithospheric versus asthenospheric mantle sources. Geochim. Cosmochim. Acta, 122(0): 127-152.	LA-ICPMS				107.363		219.35	14.3249	22.2497
Mount Morning Volcanic Field	Mount Morning	Pinnacle V.	Mason Spur Lineage	QB-Trachyte	OU78506	17				14.6069	88.1	Martin, A.P., Cooper, A.F. and Price, R.C., 2013. Petrogenesis of Cenozoic, alkalic volcanic lineages at Mount Morning, West Antarctica and their entrained lithospheric mantle xenoliths: Lithospheric versus asthenospheric mantle sources. Geochim. Cosmochim. Acta, 122(0): 127-152.	XRF	65.27	0.4	13.77	6.95		0.17	0.3	0.93	5.23	4.9	0.04									2.14	100.1				Martin, A.P., Cooper, A.F. and Price, R.C., 2013. Petrogenesis of Cenozoic, alkalic volcanic lineages at Mount Morning, West Antarctica and their entrained lithospheric mantle xenoliths: Lithospheric versus asthenospheric mantle sources. Geochim. Cosmochim. Acta, 122(0): 127-152.	XRF				2		290	-	1
Mount Morning Volcanic Field	Mount Morning	Pinnacle V.	Mason Spur Lineage	QB-Trachyte	OU78502	9				47.5543	95.3	Martin, A.P., Cooper, A.F. and Price, R.C., 2013. Petrogenesis of Cenozoic, alkalic volcanic lineages at Mount Morning, West Antarctica and their entrained lithospheric mantle xenoliths: Lithospheric versus asthenospheric mantle sources. Geochim. Cosmochim. Acta, 122(0): 127-152.	XRF	66.86	0.49	17.51	1.18		0.01	0.27	0.4	6.19	5.82	0.07									1.07	99.87				Martin, A.P., Cooper, A.F. and Price, R.C., 2013. Petrogenesis of Cenozoic, alkalic volcanic lineages at Mount Morning, West Antarctica and their entrained lithospheric mantle xenoliths: Lithospheric versus asthenospheric mantle sources. Geochim. Cosmochim. Acta, 122(0): 127-152.	XRF				146		529	-	bdl
Mount Morning Volcanic Field	Mount Morning	Pinnacle V.	Mason Spur Lineage	QB-Trachyte	OU78504	14				4.51238	87.8	Martin, A.P., Cooper, A.F. and Price, R.C., 2013. Petrogenesis of Cenozoic, alkalic volcanic lineages at Mount Morning, West Antarctica and their entrained lithospheric mantle xenoliths: Lithospheric versus asthenospheric mantle sources. Geochim. Cosmochim. Acta, 122(0): 127-152.	XRF	66.88	0.37	13.76	5.87		0.18	0.07	1.07	5.44	5.09	0.03									1.33	100.09				Martin, A.P., Cooper, A.F. and Price, R.C., 2013. Petrogenesis of Cenozoic, alkalic volcanic lineages at Mount Morning, West Antarctica and their entrained lithospheric mantle xenoliths: Lithospheric versus asthenospheric mantle sources. Geochim. Cosmochim. Acta, 122(0): 127-152.	XRF				3		139	-	bdl
Mount Morning Volcanic Field	Mount Morning	Pinnacle V.	Mason Spur Lineage	Rhyolite	OU78503	10				4.33604	84.4	Martin, A.P., Cooper, A.F. and Price, R.C., 2013. Petrogenesis of Cenozoic, alkalic volcanic lineages at Mount Morning, West Antarctica and their entrained lithospheric mantle xenoliths: Lithospheric versus asthenospheric mantle sources. Geochim. Cosmochim. Acta, 122(0): 127-152.	XRF	69.52	0.37	12.62	6.12		0.13	0.07	0.39	5.73	4.87	0.02									0.59	100.43				Martin, A.P., Cooper, A.F. and Price, R.C., 2013. Petrogenesis of Cenozoic, alkalic volcanic lineages at Mount Morning, West Antarctica and their entrained lithospheric mantle xenoliths: Lithospheric versus asthenospheric mantle sources. Geochim. Cosmochim. Acta, 122(0): 127-152.	XRF				10		332	-	bdl
Mount Morning Volcanic Field	Mount Morning	Pinnacle V.	Mason Spur Lineage	Rhyolite	OU78500	5				40.493	93.3	Martin, A.P., Cooper, A.F. and Price, R.C., 2013. Petrogenesis of Cenozoic, alkalic volcanic lineages at Mount Morning, West Antarctica and their entrained lithospheric mantle xenoliths: Lithospheric versus asthenospheric mantle sources. Geochim. Cosmochim. Acta, 122(0): 127-152.	XRF	69.64	0.25	15.69	0.99		0.01	0.17	0.71	4.62	5.08	0.02									2.68	99.86				Martin, A.P., Cooper, A.F. and Price, R.C., 2013. Petrogenesis of Cenozoic, alkalic volcanic lineages at Mount Morning, West Antarctica and their entrained lithospheric mantle xenoliths: Lithospheric versus asthenospheric mantle sources. Geochim. Cosmochim. Acta, 122(0): 127-152.	XRF				21		195	-	bdl
Mount Morning Volcanic Field	Mount Morning	Pinnacle V.	Mason Spur Lineage	Rhyolite	OU78508	12A	15.4	0.1	Martin, A.P., Cooper, A.F. and Dunlap, W.J., 2010. Geochronology of Mount Morning, Antarctica: Two-phase evolution of a long-lived trachyte-basanite-phonolite eruptive center. Bull. Volcanol., 72: 357-371, doi: 310.1007/s00445-00009-00319-00441.	60.0168	96.5	Martin, A.P., Cooper, A.F. and Price, R.C., 2013. Petrogenesis of Cenozoic, alkalic volcanic lineages at Mount Morning, West Antarctica and their entrained lithospheric mantle xenoliths: Lithospheric versus asthenospheric mantle sources. Geochim. Cosmochim. Acta, 122(0): 127-152.	XRF	71.66	0.15	15.12	0.66		0	0.25	0.11	4.96	4.93	0.01									1.68	99.53				Martin, A.P., Cooper, A.F. and Price, R.C., 2013. Petrogenesis of Cenozoic, alkalic volcanic lineages at Mount Morning, West Antarctica and their entrained lithospheric mantle xenoliths: Lithospheric versus asthenospheric mantle sources. Geochim. Cosmochim. Acta, 122(0): 127-152.	LA-ICPMS				7.11744		116.869	16.5776	19.8419
Mount Morning Volcanic Field	Mount Morning	Pinnacle V.	Mason Spur Lineage	Rhyolite	OU78511	6B				4.3854	93.1	Martin, A.P., Cooper, A.F. and Price, R.C., 2013. Petrogenesis of Cenozoic, alkalic volcanic lineages at Mount Morning, West Antarctica and their entrained lithospheric mantle xenoliths: Lithospheric versus asthenospheric mantle sources. Geochim. Cosmochim. Acta, 122(0): 127-152.	XRF	74.7	0.29	9.62	4.32		0.02	0.05	0.43	2.65	4.52	0.03									2.83	99.46				Martin, A.P., Cooper, A.F. and Price, R.C., 2013. Petrogenesis of Cenozoic, alkalic volcanic lineages at Mount Morning, West Antarctica and their entrained lithospheric mantle xenoliths: Lithospheric versus asthenospheric mantle sources. Geochim. Cosmochim. Acta, 122(0): 127-152.	LA-ICPMS				102.174		158.493	22.6668	20.6272
Mount Morning Volcanic Field	Mount Morning	RG1			AW86978							Wright-Grassham, A.C., 1987. Volcanic geology, mineralogy, and petrogenesis of the Discovery Volcanic Subprovince, Southern Victoria Land, Antarctica - PhD Thesis, New Mexico Institute of Mining and Technology, 460 pp.	XRF	62.11	0.4	15.02		7.64	0.14	0.26	0.66	6.7	4.91	0.04									1.42					Wright-Grassham, A.C., 1987. Volcanic geology, mineralogy, and petrogenesis of the Discovery Volcanic Subprovince, Southern Victoria Land, Antarctica - PhD Thesis, New Mexico Institute of Mining and Technology, 460 pp.	XRF
Mount Morning Volcanic Field	Mount Morning	RG1			AW86021							Wright-Grassham, A.C., 1987. Volcanic geology, mineralogy, and petrogenesis of the Discovery Volcanic Subprovince, Southern Victoria Land, Antarctica - PhD Thesis, New Mexico Institute of Mining and Technology, 460 pp.	XRF	62.42	0.38	15.64		6.69	0.14	0.28	1.01	7.06	5.04	0.02									0.94		INAA	6.77		Wright-Grassham, A.C., 1987. Volcanic geology, mineralogy, and petrogenesis of the Discovery Volcanic Subprovince, Southern Victoria Land, Antarctica - PhD Thesis, New Mexico Institute of Mining and Technology, 460 pp.	XRF				23		290		11	0.76
Mount Morning Volcanic Field	Mount Morning	RG1			AQ86006							Wright-Grassham, A.C., 1987. Volcanic geology, mineralogy, and petrogenesis of the Discovery Volcanic Subprovince, Southern Victoria Land, Antarctica - PhD Thesis, New Mexico Institute of Mining and Technology, 460 pp.	XRF	62.73	0.38	18.88		2.61	0.05	0.58	0.94	6.1	5.76	0.06									2.2					Wright-Grassham, A.C., 1987. Volcanic geology, mineralogy, and petrogenesis of the Discovery Volcanic Subprovince, Southern Victoria Land, Antarctica - PhD Thesis, New Mexico Institute of Mining and Technology, 460 pp.	XRF				196
Mount Morning Volcanic Field	Mount Morning	RG1			AW86018							Wright-Grassham, A.C., 1987. Volcanic geology, mineralogy, and petrogenesis of the Discovery Volcanic Subprovince, Southern Victoria Land, Antarctica - PhD Thesis, New Mexico Institute of Mining and Technology, 460 pp.	XRF	62.97	0.49	15.52		6.48	0.78	0.22	0.38	4.51	5.44	0.73									2.18		INAA	6.63		Wright-Grassham, A.C., 1987. Volcanic geology, mineralogy, and petrogenesis of the Discovery Volcanic Subprovince, Southern Victoria Land, Antarctica - PhD Thesis, New Mexico Institute of Mining and Technology, 460 pp.	XRF				94		155			0.31
Mount Morning Volcanic Field	Mount Morning	RG1			AW86986							Wright-Grassham, A.C., 1987. Volcanic geology, mineralogy, and petrogenesis of the Discovery Volcanic Subprovince, Southern Victoria Land, Antarctica - PhD Thesis, New Mexico Institute of Mining and Technology, 460 pp.	XRF	64.26	0.44	16.81		3.85	0.05	0.33	0.45	6.51	5.09	0.05									1.96					Wright-Grassham, A.C., 1987. Volcanic geology, mineralogy, and petrogenesis of the Discovery Volcanic Subprovince, Southern Victoria Land, Antarctica - PhD Thesis, New Mexico Institute of Mining and Technology, 460 pp.	XRF								11
Mount Morning Volcanic Field	Mount Morning	RG1			AW86020							Wright-Grassham, A.C., 1987. Volcanic geology, mineralogy, and petrogenesis of the Discovery Volcanic Subprovince, Southern Victoria Land, Antarctica - PhD Thesis, New Mexico Institute of Mining and Technology, 460 pp.	XRF	66.25	0.42	14.45		5.29	0.11	0.19	0.4	6.42	5.09	0.04									0.69		INAA	5.45		Wright-Grassham, A.C., 1987. Volcanic geology, mineralogy, and petrogenesis of the Discovery Volcanic Subprovince, Southern Victoria Land, Antarctica - PhD Thesis, New Mexico Institute of Mining and Technology, 460 pp.	XRF						306		12	0.2
Mount Morning Volcanic Field	Mount Morning	RG1			AW86008							Wright-Grassham, A.C., 1987. Volcanic geology, mineralogy, and petrogenesis of the Discovery Volcanic Subprovince, Southern Victoria Land, Antarctica - PhD Thesis, New Mexico Institute of Mining and Technology, 460 pp.	XRF	66.46	0.47	16.98		1.53	0.05	0.16	1.58	5.23	5.82	0.11									1.23					Wright-Grassham, A.C., 1987. Volcanic geology, mineralogy, and petrogenesis of the Discovery Volcanic Subprovince, Southern Victoria Land, Antarctica - PhD Thesis, New Mexico Institute of Mining and Technology, 460 pp.	XRF				865				11		32
Mount Morning Volcanic Field	Mount Morning	RG1			AW86976							Wright-Grassham, A.C., 1987. Volcanic geology, mineralogy, and petrogenesis of the Discovery Volcanic Subprovince, Southern Victoria Land, Antarctica - PhD Thesis, New Mexico Institute of Mining and Technology, 460 pp.	XRF	67.4	0.36	12.47		5.48	0.17	0.34	1.44	5.13	4.7	0.02									2.67		INAA	5.52		Wright-Grassham, A.C., 1987. Volcanic geology, mineralogy, and petrogenesis of the Discovery Volcanic Subprovince, Southern Victoria Land, Antarctica - PhD Thesis, New Mexico Institute of Mining and Technology, 460 pp.	XRF				21		296		13	0.41
Mount Morning Volcanic Field	Mount Morning	RG2			AW86035							Wright-Grassham, A.C., 1987. Volcanic geology, mineralogy, and petrogenesis of the Discovery Volcanic Subprovince, Southern Victoria Land, Antarctica - PhD Thesis, New Mexico Institute of Mining and Technology, 460 pp.	XRF	43.91	3.78	14.7		12.3	0.19	7.65	9.64	3.28	1.13	0.71									1.21					Wright-Grassham, A.C., 1987. Volcanic geology, mineralogy, and petrogenesis of the Discovery Volcanic Subprovince, Southern Victoria Land, Antarctica - PhD Thesis, New Mexico Institute of Mining and Technology, 460 pp.	XRF				447				232		27
Mount Morning Volcanic Field	Mount Morning	RG2			AW86036							Wright-Grassham, A.C., 1987. Volcanic geology, mineralogy, and petrogenesis of the Discovery Volcanic Subprovince, Southern Victoria Land, Antarctica - PhD Thesis, New Mexico Institute of Mining and Technology, 460 pp.	XRF	45.26	3.74	18.33		10.95	0.15	4.77	11.28	3.38	0.98	0.54									0.11					Wright-Grassham, A.C., 1987. Volcanic geology, mineralogy, and petrogenesis of the Discovery Volcanic Subprovince, Southern Victoria Land, Antarctica - PhD Thesis, New Mexico Institute of Mining and Technology, 460 pp.	XRF				415				66
Mount Morning Volcanic Field	Mount Morning	RG2			AW86013							Wright-Grassham, A.C., 1987. Volcanic geology, mineralogy, and petrogenesis of the Discovery Volcanic Subprovince, Southern Victoria Land, Antarctica - PhD Thesis, New Mexico Institute of Mining and Technology, 460 pp.	XRF	47.53	2.89	16.23		10.83	0.25	4.21	7.64	4.87	1.99	1.71									0.43		INAA	11.06		Wright-Grassham, A.C., 1987. Volcanic geology, mineralogy, and petrogenesis of the Discovery Volcanic Subprovince, Southern Victoria Land, Antarctica - PhD Thesis, New Mexico Institute of Mining and Technology, 460 pp.	XRF				680		152			0.26
Mount Morning Volcanic Field	Mount Morning	RG2			AW86012							Wright-Grassham, A.C., 1987. Volcanic geology, mineralogy, and petrogenesis of the Discovery Volcanic Subprovince, Southern Victoria Land, Antarctica - PhD Thesis, New Mexico Institute of Mining and Technology, 460 pp.	XRF	48.95	2.72	16.7		10.65	0.26	3.81	7.2	5.25	2.15	1.58									-0.34					Wright-Grassham, A.C., 1987. Volcanic geology, mineralogy, and petrogenesis of the Discovery Volcanic Subprovince, Southern Victoria Land, Antarctica - PhD Thesis, New Mexico Institute of Mining and Technology, 460 pp.	XRF				696				14
Mount Morning Volcanic Field	Mount Morning	RG2			AW86072		14.1	0.3				Wright-Grassham, A.C., 1987. Volcanic geology, mineralogy, and petrogenesis of the Discovery Volcanic Subprovince, Southern Victoria Land, Antarctica - PhD Thesis, New Mexico Institute of Mining and Technology, 460 pp.	XRF	49.68	2.48	17.06		9.83	0.24	3.81	6.94	5.51	2.33	1.32									-0.57					Wright-Grassham, A.C., 1987. Volcanic geology, mineralogy, and petrogenesis of the Discovery Volcanic Subprovince, Southern Victoria Land, Antarctica - PhD Thesis, New Mexico Institute of Mining and Technology, 460 pp.	XRF				746						15
Mount Morning Volcanic Field	Mount Morning	RG2			AW84714							Wright-Grassham, A.C., 1987. Volcanic geology, mineralogy, and petrogenesis of the Discovery Volcanic Subprovince, Southern Victoria Land, Antarctica - PhD Thesis, New Mexico Institute of Mining and Technology, 460 pp.	XRF	50.9	2.02	16.95		9.46	0.26	2.75	5.86	5.66	2.51	0.99									0.96					Wright-Grassham, A.C., 1987. Volcanic geology, mineralogy, and petrogenesis of the Discovery Volcanic Subprovince, Southern Victoria Land, Antarctica - PhD Thesis, New Mexico Institute of Mining and Technology, 460 pp.	XRF				851				12
Mount Morning Volcanic Field	Mount Morning	RG2			AW86034							Wright-Grassham, A.C., 1987. Volcanic geology, mineralogy, and petrogenesis of the Discovery Volcanic Subprovince, Southern Victoria Land, Antarctica - PhD Thesis, New Mexico Institute of Mining and Technology, 460 pp.	XRF	51.25	2.14	17.23		9.52	0.26	2.84	6.11	5.8	2.52	1.12									-0.1		INAA	9.77		Wright-Grassham, A.C., 1987. Volcanic geology, mineralogy, and petrogenesis of the Discovery Volcanic Subprovince, Southern Victoria Land, Antarctica - PhD Thesis, New Mexico Institute of Mining and Technology, 460 pp.	XRF				849		167			0.52
Mount Morning Volcanic Field	Mount Morning	RG2			AW86988							Wright-Grassham, A.C., 1987. Volcanic geology, mineralogy, and petrogenesis of the Discovery Volcanic Subprovince, Southern Victoria Land, Antarctica - PhD Thesis, New Mexico Institute of Mining and Technology, 460 pp.	XRF	53.35	1.23	17.23		8.18	0.27	1.94	4.2	6.3	2.98	0.67									2.54					Wright-Grassham, A.C., 1987. Volcanic geology, mineralogy, and petrogenesis of the Discovery Volcanic Subprovince, Southern Victoria Land, Antarctica - PhD Thesis, New Mexico Institute of Mining and Technology, 460 pp.	XRF				881				14		15
Mount Morning Volcanic Field	Mount Morning	RG2			AW86025		13	0.3				Wright-Grassham, A.C., 1987. Volcanic geology, mineralogy, and petrogenesis of the Discovery Volcanic Subprovince, Southern Victoria Land, Antarctica - PhD Thesis, New Mexico Institute of Mining and Technology, 460 pp.	XRF	54.95	1.2	17.74		8.85	0.3	1.64	4.4	6.68	3.01	0.47									0.41		INAA	9.12		Wright-Grassham, A.C., 1987. Volcanic geology, mineralogy, and petrogenesis of the Discovery Volcanic Subprovince, Southern Victoria Land, Antarctica - PhD Thesis, New Mexico Institute of Mining and Technology, 460 pp.	XRF				1291		228		10	0.51	81
Mount Morning Volcanic Field	Mount Morning	RG2			AW86041							Wright-Grassham, A.C., 1987. Volcanic geology, mineralogy, and petrogenesis of the Discovery Volcanic Subprovince, Southern Victoria Land, Antarctica - PhD Thesis, New Mexico Institute of Mining and Technology, 460 pp.	XRF	55.07	1.2	17.62		8.92	0.33	1.53	4.3	6.87	3.09	0.48									-0.21					Wright-Grassham, A.C., 1987. Volcanic geology, mineralogy, and petrogenesis of the Discovery Volcanic Subprovince, Southern Victoria Land, Antarctica - PhD Thesis, New Mexico Institute of Mining and Technology, 460 pp.	XRF				1266
Mount Morning Volcanic Field	Mount Morning	RG2			AW86016							Wright-Grassham, A.C., 1987. Volcanic geology, mineralogy, and petrogenesis of the Discovery Volcanic Subprovince, Southern Victoria Land, Antarctica - PhD Thesis, New Mexico Institute of Mining and Technology, 460 pp.	XRF	59.88	0.42	17.99		5.9	0.26	0.44	1.93	8.01	4.5	0.11									0.24		INAA	6.13		Wright-Grassham, A.C., 1987. Volcanic geology, mineralogy, and petrogenesis of the Discovery Volcanic Subprovince, Southern Victoria Land, Antarctica - PhD Thesis, New Mexico Institute of Mining and Technology, 460 pp.	XRF				1887		238			0.22
Mount Morning Volcanic Field	Mount Morning	RG2			AW86075							Wright-Grassham, A.C., 1987. Volcanic geology, mineralogy, and petrogenesis of the Discovery Volcanic Subprovince, Southern Victoria Land, Antarctica - PhD Thesis, New Mexico Institute of Mining and Technology, 460 pp.	XRF	60.74	0.22	18.29		5.33	0.23	0.47	1.34	6.44	5.16	0.06									1.76		INAA	5.34		Wright-Grassham, A.C., 1987. Volcanic geology, mineralogy, and petrogenesis of the Discovery Volcanic Subprovince, Southern Victoria Land, Antarctica - PhD Thesis, New Mexico Institute of Mining and Technology, 460 pp.	XRF				721		289			0.45
Mount Morning Volcanic Field	Mount Morning	RG2			AW86042		13.1	0.3				Wright-Grassham, A.C., 1987. Volcanic geology, mineralogy, and petrogenesis of the Discovery Volcanic Subprovince, Southern Victoria Land, Antarctica - PhD Thesis, New Mexico Institute of Mining and Technology, 460 pp.	XRF	60.84	0.18	18.07		4.85	0.24	0.17	1.06	8.96	5.22	0.03									0.33		INAA	4.96		Wright-Grassham, A.C., 1987. Volcanic geology, mineralogy, and petrogenesis of the Discovery Volcanic Subprovince, Southern Victoria Land, Antarctica - PhD Thesis, New Mexico Institute of Mining and Technology, 460 pp.	XRF				50		347			1.41
Mount Morning Volcanic Field	Mount Morning	RG3			AW86999							Wright-Grassham, A.C., 1987. Volcanic geology, mineralogy, and petrogenesis of the Discovery Volcanic Subprovince, Southern Victoria Land, Antarctica - PhD Thesis, New Mexico Institute of Mining and Technology, 460 pp.	XRF	38.86	5.28	15.46		13.19	0.18	7.2	12.05	3.22	0.94	2.19									-0.17					Wright-Grassham, A.C., 1987. Volcanic geology, mineralogy, and petrogenesis of the Discovery Volcanic Subprovince, Southern Victoria Land, Antarctica - PhD Thesis, New Mexico Institute of Mining and Technology, 460 pp.	XRF				375				34
Mount Morning Volcanic Field	Mount Morning	RG3			AW86033							Wright-Grassham, A.C., 1987. Volcanic geology, mineralogy, and petrogenesis of the Discovery Volcanic Subprovince, Southern Victoria Land, Antarctica - PhD Thesis, New Mexico Institute of Mining and Technology, 460 pp.	XRF	42.86	4.4	15.08		12.53	0.2	7.93	10.86	3.44	1.34	0.78									-0.53					Wright-Grassham, A.C., 1987. Volcanic geology, mineralogy, and petrogenesis of the Discovery Volcanic Subprovince, Southern Victoria Land, Antarctica - PhD Thesis, New Mexico Institute of Mining and Technology, 460 pp.	XRF				392				170		31
Mount Morning Volcanic Field	Mount Morning	RG3			AW86070							Wright-Grassham, A.C., 1987. Volcanic geology, mineralogy, and petrogenesis of the Discovery Volcanic Subprovince, Southern Victoria Land, Antarctica - PhD Thesis, New Mexico Institute of Mining and Technology, 460 pp.	XRF	43.35	4.12	14.71		12.53	0.21	9.52	10.17	3.55	1.2	0.58									-0.82					Wright-Grassham, A.C., 1987. Volcanic geology, mineralogy, and petrogenesis of the Discovery Volcanic Subprovince, Southern Victoria Land, Antarctica - PhD Thesis, New Mexico Institute of Mining and Technology, 460 pp.	XRF				373				368		26
Mount Morning Volcanic Field	Mount Morning	RG3			AW86061							Wright-Grassham, A.C., 1987. Volcanic geology, mineralogy, and petrogenesis of the Discovery Volcanic Subprovince, Southern Victoria Land, Antarctica - PhD Thesis, New Mexico Institute of Mining and Technology, 460 pp.	XRF	44.63	2.71	13.85		10.91	0.2	11.1	11.12	3.36	1.13	0.56									-0.27					Wright-Grassham, A.C., 1987. Volcanic geology, mineralogy, and petrogenesis of the Discovery Volcanic Subprovince, Southern Victoria Land, Antarctica - PhD Thesis, New Mexico Institute of Mining and Technology, 460 pp.	XRF				359				597		47
Mount Morning Volcanic Field	Mount Morning	RG3			AW86037							Wright-Grassham, A.C., 1987. Volcanic geology, mineralogy, and petrogenesis of the Discovery Volcanic Subprovince, Southern Victoria Land, Antarctica - PhD Thesis, New Mexico Institute of Mining and Technology, 460 pp.	XRF	45.28	3.31	16.02		11.01	0.21	6.83	10.09	4.4	1.37	0.85									-0.61		INAA	11.32		Wright-Grassham, A.C., 1987. Volcanic geology, mineralogy, and petrogenesis of the Discovery Volcanic Subprovince, Southern Victoria Land, Antarctica - PhD Thesis, New Mexico Institute of Mining and Technology, 460 pp.	XRF				438		119		217	0.4	23
Mount Morning Volcanic Field	Mount Morning	RG3			AW86032							Wright-Grassham, A.C., 1987. Volcanic geology, mineralogy, and petrogenesis of the Discovery Volcanic Subprovince, Southern Victoria Land, Antarctica - PhD Thesis, New Mexico Institute of Mining and Technology, 460 pp.	XRF	47.36	3.18	17.09		10.87	0.23	4.55	8.4	4.74	1.8	1									-0.35					Wright-Grassham, A.C., 1987. Volcanic geology, mineralogy, and petrogenesis of the Discovery Volcanic Subprovince, Southern Victoria Land, Antarctica - PhD Thesis, New Mexico Institute of Mining and Technology, 460 pp.	XRF				523				27
Mount Morning Volcanic Field	Mount Morning	RG3			AW86063							Wright-Grassham, A.C., 1987. Volcanic geology, mineralogy, and petrogenesis of the Discovery Volcanic Subprovince, Southern Victoria Land, Antarctica - PhD Thesis, New Mexico Institute of Mining and Technology, 460 pp.	XRF	47.61	2.67	16.36		10.82	0.22	6.1	8.4	4.79	1.83	0.83									-0.85					Wright-Grassham, A.C., 1987. Volcanic geology, mineralogy, and petrogenesis of the Discovery Volcanic Subprovince, Southern Victoria Land, Antarctica - PhD Thesis, New Mexico Institute of Mining and Technology, 460 pp.	XRF				536				181		18
Mount Morning Volcanic Field	Mount Morning	Riviera Ridge	Mason Spur Lineage	Trachyte	OU78613	140				29.6779	85.5	Martin, A.P., Cooper, A.F. and Price, R.C., 2013. Petrogenesis of Cenozoic, alkalic volcanic lineages at Mount Morning, West Antarctica and their entrained lithospheric mantle xenoliths: Lithospheric versus asthenospheric mantle sources. Geochim. Cosmochim. Acta, 122(0): 127-152.	XRF	60.03	0.61	18.6	5.54		0.19	0.59	2.23	7.49	4.9	0.2									0.38	100.76				Martin, A.P., Cooper, A.F. and Price, R.C., 2013. Petrogenesis of Cenozoic, alkalic volcanic lineages at Mount Morning, West Antarctica and their entrained lithospheric mantle xenoliths: Lithospheric versus asthenospheric mantle sources. Geochim. Cosmochim. Acta, 122(0): 127-152.	LA-ICPMS				21.6365		34.9254	61.3669	381.046
Mount Morning Volcanic Field	Mount Morning				prim basn							van Woerden, T.H., 2006. Volcanic geology and physical volcanology of Mount Morning, Antarctica - Masters Thesis,, University of Waikato, Hamilton, 156 pp.	XRF	42.57	4.46	14.55	15.1248		0.2	8.79	10.69	3.31	1.25	0.57									-0.39					van Woerden, T.H., 2006. Volcanic geology and physical volcanology of Mount Morning, Antarctica - Masters Thesis,, University of Waikato, Hamilton, 156 pp.	XRF				344	0.6	65	159	360		44
Mount Morning Volcanic Field	Mount Morning				prim basn							van Woerden, T.H., 2006. Volcanic geology and physical volcanology of Mount Morning, Antarctica - Masters Thesis,, University of Waikato, Hamilton, 156 pp.	XRF	42.6	3.97	13.96	14.2691		0.2	8.71	12.71	3.23	1.12	0.67									0.12					van Woerden, T.H., 2006. Volcanic geology and physical volcanology of Mount Morning, Antarctica - Masters Thesis,, University of Waikato, Hamilton, 156 pp.	XRF				353	1.7	76	724	347		73
Mount Morning Volcanic Field	Mount Morning				prim basn							van Woerden, T.H., 2006. Volcanic geology and physical volcanology of Mount Morning, Antarctica - Masters Thesis,, University of Waikato, Hamilton, 156 pp.	XRF	42.88	3.9	13.57	14.6914		0.2	11.38	10	3.28	1.04	0.54									-0.64					van Woerden, T.H., 2006. Volcanic geology and physical volcanology of Mount Morning, Antarctica - Masters Thesis,, University of Waikato, Hamilton, 156 pp.	XRF				307	1.3	60	418	695		39
Mount Morning Volcanic Field	Mount Morning				prim basn							van Woerden, T.H., 2006. Volcanic geology and physical volcanology of Mount Morning, Antarctica - Masters Thesis,, University of Waikato, Hamilton, 156 pp.	XRF	42.93	3.88	14.03	14.7136		0.19	10.54	10.46	3.12	1.06	0.54									-0.63					van Woerden, T.H., 2006. Volcanic geology and physical volcanology of Mount Morning, Antarctica - Masters Thesis,, University of Waikato, Hamilton, 156 pp.	XRF				293	1.7	68	438	380		47
Mount Morning Volcanic Field	Mount Morning				prim basn							van Woerden, T.H., 2006. Volcanic geology and physical volcanology of Mount Morning, Antarctica - Masters Thesis,, University of Waikato, Hamilton, 156 pp.	XRF	43.18	3.92	14.31	14.4802		0.19	9.68	10.68	3.38	1.05	0.57									-0.48					van Woerden, T.H., 2006. Volcanic geology and physical volcanology of Mount Morning, Antarctica - Masters Thesis,, University of Waikato, Hamilton, 156 pp.	XRF				292	1.2	67	450	369		65
Mount Morning Volcanic Field	Mount Morning				prim basn							van Woerden, T.H., 2006. Volcanic geology and physical volcanology of Mount Morning, Antarctica - Masters Thesis,, University of Waikato, Hamilton, 156 pp.	XRF	43.3	3.76	14.19	14.558		0.19	9.88	10.59	3.33	1.1	0.56									-0.6					van Woerden, T.H., 2006. Volcanic geology and physical volcanology of Mount Morning, Antarctica - Masters Thesis,, University of Waikato, Hamilton, 156 pp.	XRF				269	1.3	63	466	406		52
Mount Morning Volcanic Field	Mount Morning				prim basn							van Woerden, T.H., 2006. Volcanic geology and physical volcanology of Mount Morning, Antarctica - Masters Thesis,, University of Waikato, Hamilton, 156 pp.	XRF	43.31	3.72	14.59	13.7023		0.19	9.06	10.34	4.66	1.19	0.62									-0.55					van Woerden, T.H., 2006. Volcanic geology and physical volcanology of Mount Morning, Antarctica - Masters Thesis,, University of Waikato, Hamilton, 156 pp.	XRF				295	1.5	69	607	331		30
Mount Morning Volcanic Field	Mount Morning				prim basn							van Woerden, T.H., 2006. Volcanic geology and physical volcanology of Mount Morning, Antarctica - Masters Thesis,, University of Waikato, Hamilton, 156 pp.	XRF	43.35	3.76	14.31	14.558		0.2	9.8	10.48	3.32	1.13	0.56									-0.37					van Woerden, T.H., 2006. Volcanic geology and physical volcanology of Mount Morning, Antarctica - Masters Thesis,, University of Waikato, Hamilton, 156 pp.	XRF				286	1.8	64	322	363		47
Mount Morning Volcanic Field	Mount Morning				prim basn							van Woerden, T.H., 2006. Volcanic geology and physical volcanology of Mount Morning, Antarctica - Masters Thesis,, University of Waikato, Hamilton, 156 pp.	XRF	43.59	3.66	13.97	14.158		0.2	10.06	10.53	3.46	1.19	0.6									-0.44					van Woerden, T.H., 2006. Volcanic geology and physical volcanology of Mount Morning, Antarctica - Masters Thesis,, University of Waikato, Hamilton, 156 pp.	XRF				343	1.4	75	528	474		52
Mount Morning Volcanic Field	Mount Morning				prim basn							van Woerden, T.H., 2006. Volcanic geology and physical volcanology of Mount Morning, Antarctica - Masters Thesis,, University of Waikato, Hamilton, 156 pp.	XRF	43.63	3.78	14.71	14.2802		0.2	9.26	10.34	3.41	1.22	0.61									-0.25					van Woerden, T.H., 2006. Volcanic geology and physical volcanology of Mount Morning, Antarctica - Masters Thesis,, University of Waikato, Hamilton, 156 pp.	XRF				298	1.3	68	423	315		49
Mount Morning Volcanic Field	Mount Morning				prim basn							van Woerden, T.H., 2006. Volcanic geology and physical volcanology of Mount Morning, Antarctica - Masters Thesis,, University of Waikato, Hamilton, 156 pp.	XRF	43.69	3.77	14.18	14.2802		0.2	9.46	10.8	3.2	1.27	0.59									-0.42					van Woerden, T.H., 2006. Volcanic geology and physical volcanology of Mount Morning, Antarctica - Masters Thesis,, University of Waikato, Hamilton, 156 pp.	XRF				347	1.8	72	673	480		57
Mount Morning Volcanic Field	Mount Morning				prim basn							van Woerden, T.H., 2006. Volcanic geology and physical volcanology of Mount Morning, Antarctica - Masters Thesis,, University of Waikato, Hamilton, 156 pp.	XRF	43.89	3.11	14.18	13.6134		0.2	9.81	11.56	3.28	1.16	0.58									-0.14					van Woerden, T.H., 2006. Volcanic geology and physical volcanology of Mount Morning, Antarctica - Masters Thesis,, University of Waikato, Hamilton, 156 pp.	XRF				405	1	68	488	379		54
Mount Morning Volcanic Field	Mount Morning				prim basn							van Woerden, T.H., 2006. Volcanic geology and physical volcanology of Mount Morning, Antarctica - Masters Thesis,, University of Waikato, Hamilton, 156 pp.	XRF	43.94	2.89	13.82	12.6799		0.19	10.58	12.29	2.86	1.36	0.65									0.06					van Woerden, T.H., 2006. Volcanic geology and physical volcanology of Mount Morning, Antarctica - Masters Thesis,, University of Waikato, Hamilton, 156 pp.	XRF				378	1.4	73	482	552		47
Mount Morning Volcanic Field	Mount Morning				prim basn							van Woerden, T.H., 2006. Volcanic geology and physical volcanology of Mount Morning, Antarctica - Masters Thesis,, University of Waikato, Hamilton, 156 pp.	XRF	44	3.75	14.51	13.7912		0.2	9.33	10.2	3.78	1.21	0.62									-0.55					van Woerden, T.H., 2006. Volcanic geology and physical volcanology of Mount Morning, Antarctica - Masters Thesis,, University of Waikato, Hamilton, 156 pp.	XRF				365	1.7	76	676	443		48
Mount Morning Volcanic Field	Mount Morning				prim basn							van Woerden, T.H., 2006. Volcanic geology and physical volcanology of Mount Morning, Antarctica - Masters Thesis,, University of Waikato, Hamilton, 156 pp.	XRF	44.04	2.91	14.05	12.9355		0.19	10.27	11.9	3.14	1.3	0.57									1.14					van Woerden, T.H., 2006. Volcanic geology and physical volcanology of Mount Morning, Antarctica - Masters Thesis,, University of Waikato, Hamilton, 156 pp.	XRF				318	1.7	69	750	702		59
Mount Morning Volcanic Field	Mount Morning				prim basn							van Woerden, T.H., 2006. Volcanic geology and physical volcanology of Mount Morning, Antarctica - Masters Thesis,, University of Waikato, Hamilton, 156 pp.	XRF	44.19	3.04	14.26	13.3134		0.2	9.95	11.36	3.19	1.26	0.58									-0.05					van Woerden, T.H., 2006. Volcanic geology and physical volcanology of Mount Morning, Antarctica - Masters Thesis,, University of Waikato, Hamilton, 156 pp.	XRF				425	1.5	70	383	338		54
Mount Morning Volcanic Field	Mount Morning				evold basn							van Woerden, T.H., 2006. Volcanic geology and physical volcanology of Mount Morning, Antarctica - Masters Thesis,, University of Waikato, Hamilton, 156 pp.	XRF	44.68	3.43	15.25	13.8135		0.2	7.96	10.07	3.88	1.44	0.66									-0.46					van Woerden, T.H., 2006. Volcanic geology and physical volcanology of Mount Morning, Antarctica - Masters Thesis,, University of Waikato, Hamilton, 156 pp.	XRF				392	1.3	94	495	237		45
Mount Morning Volcanic Field	Mount Morning				Low alk basn							van Woerden, T.H., 2006. Volcanic geology and physical volcanology of Mount Morning, Antarctica - Masters Thesis,, University of Waikato, Hamilton, 156 pp.	XRF	44.69	2.61	14.38	12.9355		0.18	9.33	12.91	2.82	0.99	0.44									-0.41					van Woerden, T.H., 2006. Volcanic geology and physical volcanology of Mount Morning, Antarctica - Masters Thesis,, University of Waikato, Hamilton, 156 pp.	XRF				249	1.1	58	398	351		64
Mount Morning Volcanic Field	Mount Morning				evold basn							van Woerden, T.H., 2006. Volcanic geology and physical volcanology of Mount Morning, Antarctica - Masters Thesis,, University of Waikato, Hamilton, 156 pp.	XRF	44.92	3.38	15.22	13.6912		0.2	8.02	9.92	3.89	1.46	0.68									-0.43					van Woerden, T.H., 2006. Volcanic geology and physical volcanology of Mount Morning, Antarctica - Masters Thesis,, University of Waikato, Hamilton, 156 pp.	XRF				390	1.5	84	528	265		43
Mount Morning Volcanic Field	Mount Morning				Low alk basn							van Woerden, T.H., 2006. Volcanic geology and physical volcanology of Mount Morning, Antarctica - Masters Thesis,, University of Waikato, Hamilton, 156 pp.	XRF	44.94	2.59	14.14	12.8355		0.18	9.59	12.82	3.02	0.75	0.43									-0.42					van Woerden, T.H., 2006. Volcanic geology and physical volcanology of Mount Morning, Antarctica - Masters Thesis,, University of Waikato, Hamilton, 156 pp.	XRF				251	1.1	56	309	403		63
Mount Morning Volcanic Field	Mount Morning				Low alk basn							van Woerden, T.H., 2006. Volcanic geology and physical volcanology of Mount Morning, Antarctica - Masters Thesis,, University of Waikato, Hamilton, 156 pp.	XRF	45.02	2.58	14.33	12.7799		0.18	9.37	12.87	2.82	0.91	0.43									-0.36					van Woerden, T.H., 2006. Volcanic geology and physical volcanology of Mount Morning, Antarctica - Masters Thesis,, University of Waikato, Hamilton, 156 pp.	XRF				253	1.4	54	420	400		67
Mount Morning Volcanic Field	Mount Morning				evold basn							van Woerden, T.H., 2006. Volcanic geology and physical volcanology of Mount Morning, Antarctica - Masters Thesis,, University of Waikato, Hamilton, 156 pp.	XRF	45.23	2.98	15.71	12.9244		0.2	7.89	10.9	3.38	1.16	0.91									-0.24					van Woerden, T.H., 2006. Volcanic geology and physical volcanology of Mount Morning, Antarctica - Masters Thesis,, University of Waikato, Hamilton, 156 pp.	XRF				394	0.4	90	78	175		37
Mount Morning Volcanic Field	Mount Morning				evold basn							van Woerden, T.H., 2006. Volcanic geology and physical volcanology of Mount Morning, Antarctica - Masters Thesis,, University of Waikato, Hamilton, 156 pp.	XRF	45.26	3.94	16.06	14.5691		0.2	5.38	9.08	4.27	1.72	0.99									0.76					van Woerden, T.H., 2006. Volcanic geology and physical volcanology of Mount Morning, Antarctica - Masters Thesis,, University of Waikato, Hamilton, 156 pp.	XRF				572	2.1	107	725	8		31
Mount Morning Volcanic Field	Mount Morning				evold basn							van Woerden, T.H., 2006. Volcanic geology and physical volcanology of Mount Morning, Antarctica - Masters Thesis,, University of Waikato, Hamilton, 156 pp.	XRF	45.34	3.87	16.19	14.2135		0.2	5.05	8.85	5.02	1.68	1.01									0.52					van Woerden, T.H., 2006. Volcanic geology and physical volcanology of Mount Morning, Antarctica - Masters Thesis,, University of Waikato, Hamilton, 156 pp.	XRF				575	2.1	107	698	9		28
Mount Morning Volcanic Field	Mount Morning				evold basn							van Woerden, T.H., 2006. Volcanic geology and physical volcanology of Mount Morning, Antarctica - Masters Thesis,, University of Waikato, Hamilton, 156 pp.	XRF	45.65	2.86	15.31	12.4354		0.21	7.75	11.03	3.8	1.56	0.65									-0.08					van Woerden, T.H., 2006. Volcanic geology and physical volcanology of Mount Morning, Antarctica - Masters Thesis,, University of Waikato, Hamilton, 156 pp.	XRF				496	2.5	86	744	316		45
Mount Morning Volcanic Field	Mount Morning				evold basn							van Woerden, T.H., 2006. Volcanic geology and physical volcanology of Mount Morning, Antarctica - Masters Thesis,, University of Waikato, Hamilton, 156 pp.	XRF	45.95	2.84	15.85	12.4466		0.2	7.52	10.31	3.89	1.65	0.58									-0.27					van Woerden, T.H., 2006. Volcanic geology and physical volcanology of Mount Morning, Antarctica - Masters Thesis,, University of Waikato, Hamilton, 156 pp.	XRF				648	1.2	85	337	226		44
Mount Morning Volcanic Field	Mount Morning				evold basn			Z				van Woerden, T.H., 2006. Volcanic geology and physical volcanology of Mount Morning, Antarctica - Masters Thesis,, University of Waikato, Hamilton, 156 pp.	XRF	46.96	3.12	16.24	12.5021		0.2	5.47	9.63	4.41	1.73	0.99									0.02					van Woerden, T.H., 2006. Volcanic geology and physical volcanology of Mount Morning, Antarctica - Masters Thesis,, University of Waikato, Hamilton, 156 pp.	XRF				542	2	103	753	78		31
Mount Morning Volcanic Field	Mount Morning				evold basn							van Woerden, T.H., 2006. Volcanic geology and physical volcanology of Mount Morning, Antarctica - Masters Thesis,, University of Waikato, Hamilton, 156 pp.	XRF	47.88	3.06	16.61	12.3132		0.22	4.64	8.56	4.98	1.88	1.1									0.55					van Woerden, T.H., 2006. Volcanic geology and physical volcanology of Mount Morning, Antarctica - Masters Thesis,, University of Waikato, Hamilton, 156 pp.	XRF				676	1.8	108	837	10		23
Mount Morning Volcanic Field	Mount Morning				hi Si basn							van Woerden, T.H., 2006. Volcanic geology and physical volcanology of Mount Morning, Antarctica - Masters Thesis,, University of Waikato, Hamilton, 156 pp.	XRF	48.34	2.92	16.28	13.0355		0.24	3.94	7.7	5.01	2.17	1.67									2.23					van Woerden, T.H., 2006. Volcanic geology and physical volcanology of Mount Morning, Antarctica - Masters Thesis,, University of Waikato, Hamilton, 156 pp.	XRF				603	2.1	136	915	bdl		5.3
Mount Morning Volcanic Field	Mount Morning				hi Si basn							van Woerden, T.H., 2006. Volcanic geology and physical volcanology of Mount Morning, Antarctica - Masters Thesis,, University of Waikato, Hamilton, 156 pp.	XRF	48.52	2.91	16.31	13.1133		0.24	3.38	7.55	5.45	2.2	1.63									0.77					van Woerden, T.H., 2006. Volcanic geology and physical volcanology of Mount Morning, Antarctica - Masters Thesis,, University of Waikato, Hamilton, 156 pp.	XRF				616	2.6	138	1075	bdl		4.7
Mount Morning Volcanic Field	Mount Morning				hi Si basn							van Woerden, T.H., 2006. Volcanic geology and physical volcanology of Mount Morning, Antarctica - Masters Thesis,, University of Waikato, Hamilton, 156 pp.	XRF	49.09	2.82	16.42	12.8133		0.24	3.47	7.39	5.18	2.27	1.6									1.19					van Woerden, T.H., 2006. Volcanic geology and physical volcanology of Mount Morning, Antarctica - Masters Thesis,, University of Waikato, Hamilton, 156 pp.	XRF				626	2.3	134	783	bdl		4.9
Mount Morning Volcanic Field	Mount Morning				hi Si basn							van Woerden, T.H., 2006. Volcanic geology and physical volcanology of Mount Morning, Antarctica - Masters Thesis,, University of Waikato, Hamilton, 156 pp.	XRF	49.1	2.82	16.47	12.7244		0.24	3.49	7.39	5.17	2.26	1.62									0.68					van Woerden, T.H., 2006. Volcanic geology and physical volcanology of Mount Morning, Antarctica - Masters Thesis,, University of Waikato, Hamilton, 156 pp.	XRF				625	2.8	134	1113	bdl		6.1
Mount Morning Volcanic Field	Mount Morning				trachyte							van Woerden, T.H., 2006. Volcanic geology and physical volcanology of Mount Morning, Antarctica - Masters Thesis,, University of Waikato, Hamilton, 156 pp.	XRF	58.92	0.67	18.09	8.22362		0.25	0.72	2.72	6.9	4.07	0.27									0.72					van Woerden, T.H., 2006. Volcanic geology and physical volcanology of Mount Morning, Antarctica - Masters Thesis,, University of Waikato, Hamilton, 156 pp.	XRF				1052	3.1	176	1061	<0.9		4.3
Southern Local Suite	TAM Foothills	F			AW86094							Wright-Grassham, A.C., 1987. Volcanic geology, mineralogy, and petrogenesis of the Discovery Volcanic Subprovince, Southern Victoria Land, Antarctica - PhD Thesis, New Mexico Institute of Mining and Technology, 460 pp.	XRF	42.4	3.96	13.46		12.38	0.21	11.06	10.86	3.25	1.13	0.7									-0.82					Wright-Grassham, A.C., 1987. Volcanic geology, mineralogy, and petrogenesis of the Discovery Volcanic Subprovince, Southern Victoria Land, Antarctica - PhD Thesis, New Mexico Institute of Mining and Technology, 460 pp.	XRF				363				568		32
Southern Local Suite	TAM Foothills	F			AW86095							Wright-Grassham, A.C., 1987. Volcanic geology, mineralogy, and petrogenesis of the Discovery Volcanic Subprovince, Southern Victoria Land, Antarctica - PhD Thesis, New Mexico Institute of Mining and Technology, 460 pp.	XRF	43.5	3.67	14.51		11.92	0.2	8.69	11.55	3.23	1.23	0.63									-0.77					Wright-Grassham, A.C., 1987. Volcanic geology, mineralogy, and petrogenesis of the Discovery Volcanic Subprovince, Southern Victoria Land, Antarctica - PhD Thesis, New Mexico Institute of Mining and Technology, 460 pp.	XRF				324				341		35
Southern Local Suite	TAM Foothills	F			AW86088							Wright-Grassham, A.C., 1987. Volcanic geology, mineralogy, and petrogenesis of the Discovery Volcanic Subprovince, Southern Victoria Land, Antarctica - PhD Thesis, New Mexico Institute of Mining and Technology, 460 pp.	XRF	44.66	3.98	15.99		12.03	0.2	6.03	9.53	3.71	1.39	0.94									0.21					Wright-Grassham, A.C., 1987. Volcanic geology, mineralogy, and petrogenesis of the Discovery Volcanic Subprovince, Southern Victoria Land, Antarctica - PhD Thesis, New Mexico Institute of Mining and Technology, 460 pp.	XRF				475				100		18
Southern Local Suite	TAM Foothills	F			AW86089							Wright-Grassham, A.C., 1987. Volcanic geology, mineralogy, and petrogenesis of the Discovery Volcanic Subprovince, Southern Victoria Land, Antarctica - PhD Thesis, New Mexico Institute of Mining and Technology, 460 pp.	XRF	45.66	3.66	16.54		11.39	0.24	4.91	8.69	4.49	1.53	1.13									0.72		INAA	10.5		Wright-Grassham, A.C., 1987. Volcanic geology, mineralogy, and petrogenesis of the Discovery Volcanic Subprovince, Southern Victoria Land, Antarctica - PhD Thesis, New Mexico Institute of Mining and Technology, 460 pp.	XRF				575				23		bdl
Southern Local Suite	TAM foothills	Foster Crater	Royal Society Range		Foc71							Gamble, J.A. and Kyle, P.R., 1987. The origins of glass and amphibole in spinel-wehrlite xenoliths from Foster Crater, McMurdo Volcanic Group, Antarctica. J. Petrol., 28(5): 755-779.	XRF	43.52	3.84	14.78		12.16	0.19	8.46	11.03	2.65	1.28	0.6									-0.13					Gamble, J.A. and Kyle, P.R., 1987. The origins of glass and amphibole in spinel-wehrlite xenoliths from Foster Crater, McMurdo Volcanic Group, Antarctica. J. Petrol., 28(5): 755-779.	XRF				382				203		27
Southern Local Suite	TAM Foothills	Royal Society Range		Basanite	64							Keys, J.R., Anderton, P.W. and Kyle, P.R., 1977. Tephra and debris layers in the Skelton Neve And Kempe Glacier, South Victoria Land, Antarctica. New Zeal. J. Geol. Geophys., 20(5): 971-1002.	XRF	41.73	3.35	12.82	13.68		0.19	10.25	11.08	3.2	1.06	0.59														Keys, J.R., Anderton, P.W. and Kyle, P.R., 1977. Tephra and debris layers in the Skelton Neve And Kempe Glacier, South Victoria Land, Antarctica. New Zeal. J. Geol. Geophys., 20(5): 971-1002.	XRF
Southern Local Suite	TAM Foothills	Royal Society Range		Basanite	4							McIver, J.R. and Gevers, T.W., 1970. Volcanic vents below the Royal Society Range, Central Victoria Land, Antarctica. Trans. Geol. Soc. S. Afr., 73: 65-88.	XRF	42.48	3.34	12.88	3.75	7.87	0.19	10.88	11.08	2.52	1.12	nd									0.94					McIver, J.R. and Gevers, T.W., 1970. Volcanic vents below the Royal Society Range, Central Victoria Land, Antarctica. Trans. Geol. Soc. S. Afr., 73: 65-88.	XRF								0.05
Southern Local Suite	TAM Foothills	Royal Society Range		Basanite	52							Keys, J.R., Anderton, P.W. and Kyle, P.R., 1977. Tephra and debris layers in the Skelton Neve And Kempe Glacier, South Victoria Land, Antarctica. New Zeal. J. Geol. Geophys., 20(5): 971-1002.	XRF	42.55	3.32	14.6	12.82		0.19	7.19	11.92	3.29	1.24	0.6									0.55					Keys, J.R., Anderton, P.W. and Kyle, P.R., 1977. Tephra and debris layers in the Skelton Neve And Kempe Glacier, South Victoria Land, Antarctica. New Zeal. J. Geol. Geophys., 20(5): 971-1002.	XRF
Southern Local Suite	TAM Foothills	Royal Society Range		Basanite	61							Keys, J.R., Anderton, P.W. and Kyle, P.R., 1977. Tephra and debris layers in the Skelton Neve And Kempe Glacier, South Victoria Land, Antarctica. New Zeal. J. Geol. Geophys., 20(5): 971-1002.	XRF	42.93	3.29	14.29	12.95		0.19	7.71	11.61	3.38	1.23	0.62									0.01					Keys, J.R., Anderton, P.W. and Kyle, P.R., 1977. Tephra and debris layers in the Skelton Neve And Kempe Glacier, South Victoria Land, Antarctica. New Zeal. J. Geol. Geophys., 20(5): 971-1002.	XRF
Southern Local Suite	TAM Foothills	Royal Society Range		Basanite	56							Keys, J.R., Anderton, P.W. and Kyle, P.R., 1977. Tephra and debris layers in the Skelton Neve And Kempe Glacier, South Victoria Land, Antarctica. New Zeal. J. Geol. Geophys., 20(5): 971-1002.	XRF	43.13	3.43	14.69	13.17		0.19	7.61	11.98	3.27	1.23	0.63														Keys, J.R., Anderton, P.W. and Kyle, P.R., 1977. Tephra and debris layers in the Skelton Neve And Kempe Glacier, South Victoria Land, Antarctica. New Zeal. J. Geol. Geophys., 20(5): 971-1002.	XRF
Southern Local Suite	TAM Foothills	Royal Society Range		Basanite	62							Keys, J.R., Anderton, P.W. and Kyle, P.R., 1977. Tephra and debris layers in the Skelton Neve And Kempe Glacier, South Victoria Land, Antarctica. New Zeal. J. Geol. Geophys., 20(5): 971-1002.	XRF	43.15	3.41	14.57	13.31		0.19	7.82	11.72	3.41	1.24	0.64														Keys, J.R., Anderton, P.W. and Kyle, P.R., 1977. Tephra and debris layers in the Skelton Neve And Kempe Glacier, South Victoria Land, Antarctica. New Zeal. J. Geol. Geophys., 20(5): 971-1002.	XRF
Southern Local Suite	TAM foothills	Royal Society Range	Brandau Vent		BUH							Kyle, P.R., Wright, A.C. and Kirsch, I., 1987. Ultramafic xenoliths in the late Cenozoic, McMurdo Volcanic Group, Western Ross Sea embayment, Antarctica. In: P. Nixon (Editor), Mantle Xenoliths. John Wiley, New York, pp. 287-293.	XRF	43.17	3.45	13.98		11.56	0.19	9.42	11.48	3.17	1.04	0.66									0.04					Kyle, P.R., Wright, A.C. and Kirsch, I., 1987. Ultramafic xenoliths in the late Cenozoic, McMurdo Volcanic Group, Western Ross Sea embayment, Antarctica. In: P. Nixon (Editor), Mantle Xenoliths. John Wiley, New York, pp. 287-293.	XRF				375				420		59
Southern Local Suite	TAM foothills	Royal Society Range	Foster Crater		FOC71B							Kyle, P.R., Wright, A.C. and Kirsch, I., 1987. Ultramafic xenoliths in the late Cenozoic, McMurdo Volcanic Group, Western Ross Sea embayment, Antarctica. In: P. Nixon (Editor), Mantle Xenoliths. John Wiley, New York, pp. 287-293.	XRF	43.29	3.74	14.39		11.98	0.19	8.63	11.19	3	1.24	0.56									0.13					Kyle, P.R., Wright, A.C. and Kirsch, I., 1987. Ultramafic xenoliths in the late Cenozoic, McMurdo Volcanic Group, Western Ross Sea embayment, Antarctica. In: P. Nixon (Editor), Mantle Xenoliths. John Wiley, New York, pp. 287-293.	XRF				372				213		44
Southern Local Suite	TAM Foothills	Royal Society Range		Basanite	63							Keys, J.R., Anderton, P.W. and Kyle, P.R., 1977. Tephra and debris layers in the Skelton Neve And Kempe Glacier, South Victoria Land, Antarctica. New Zeal. J. Geol. Geophys., 20(5): 971-1002.	XRF	43.37	3.23	13.53	12.94		0.19	9.83	11.25	3	1.13	0.55														Keys, J.R., Anderton, P.W. and Kyle, P.R., 1977. Tephra and debris layers in the Skelton Neve And Kempe Glacier, South Victoria Land, Antarctica. New Zeal. J. Geol. Geophys., 20(5): 971-1002.	XRF
Southern Local Suite	TAM Foothills	Royal Society Range		Basanite	6							Wright, A.C. and Kyle, P.R., 1990. Royal Society Range. In: W.E. LeMasurier and J.W. Thomson (Editors), Volcanoes of the Antarctic Plate and Southern Oceans, Antarctic Research Series 48. American Geophysical Union, Washington, pp. 131-133.	XRF	43.57	3.9	14.99	13.66		0.19	8.18	10.96	2.7	1.2	0.63									0.13					Wright, A.C. and Kyle, P.R., 1990. Royal Society Range. In: W.E. LeMasurier and J.W. Thomson (Editors), Volcanoes of the Antarctic Plate and Southern Oceans, Antarctic Research Series 48. American Geophysical Union, Washington, pp. 131-133.	XRF
Southern Local Suite	TAM foothills	TAMS foothills		Basanitoid	6							Goldich, S., Treves, S., Suhr, N. and Stuckless, J., 1975. Geochemistry of the Cenozoic volcanic rocks of Ross Island and vicinity, Antarctica. The Journal of Geology, 83(4): 415-435.	AAS	43.3	3.42	12.8	3.19	9.33	0.19	10.9	12.9	2.62	0.93	0.55	0.03	0.03		0.09			0.07	0.03						Goldich, S., Treves, S., Suhr, N. and Stuckless, J., 1975. Geochemistry of the Cenozoic volcanic rocks of Ross Island and vicinity, Antarctica. The Journal of Geology, 83(4): 415-435.	AAS	0.3			260	2.2	bdl	50	650		64
Southern Local Suite	TAM Foothills	Taylor & Wright Valleys		Basanite	7							Smith, W.C., 1954. The volcanic rocks of the Ross archipelago, British Terra Nova Expedition, 1910. Natural History Report.	XRF	41.47	5.19	14.31	3.96	11.48	0.22	7.07	10.03	3.13	1.59	0.349							0.93							Smith, W.C., 1954. The volcanic rocks of the Ross archipelago, British Terra Nova Expedition, 1910. Natural History Report.	XRF				0.04
Southern Local Suite	TAM Foothills	Taylor & Wright Valleys		Basanite	8							Smith, W.C., 1954. The volcanic rocks of the Ross archipelago, British Terra Nova Expedition, 1910. Natural History Report.	XRF	42.92	3.77	15.34	3.71	10.39	0.23	7.25	10.98	3.15	1.3	bdl		0.08			0.2		0.35							Smith, W.C., 1954. The volcanic rocks of the Ross archipelago, British Terra Nova Expedition, 1910. Natural History Report.	XRF				0.05
Southern Local Suite	TAM Foothills	Taylor & Wright Valleys		Basanite	9							Wright, A.C. and Kyle, P.R., 1990. Taylor and Wright Valleys. In: W.E. LeMasurier and J.W. Thomson (Editors), Volcanoes of the Antarctic Plate and Southern Oceans, Antarctic Research Series 48. American Geophysical Union, Washington, pp. 134-135.	XRF	45	2.9	14.8		13	0.22	7.1	9.3	4.3	1.7	0.65		0.16					0.8							Wright, A.C. and Kyle, P.R., 1990. Taylor and Wright Valleys. In: W.E. LeMasurier and J.W. Thomson (Editors), Volcanoes of the Antarctic Plate and Southern Oceans, Antarctic Research Series 48. American Geophysical Union, Washington, pp. 134-135.	XRF
Southern Local Suite	TAM foothills	Taylor Valley		Basanitoid	5							Goldich, S., Treves, S., Suhr, N. and Stuckless, J., 1975. Geochemistry of the Cenozoic volcanic rocks of Ross Island and vicinity, Antarctica. The Journal of Geology, 83(4): 415-435.	AAS	43.1	3.32	14.3	4.89	8.55	0.21	8.3	10	4.31	1.51	0.63	0.05	0.02		0.12			0.2	0.46						Goldich, S., Treves, S., Suhr, N. and Stuckless, J., 1975. Geochemistry of the Cenozoic volcanic rocks of Ross Island and vicinity, Antarctica. The Journal of Geology, 83(4): 415-435.	AAS	0.3			410	2.7	bdl	54	210		50
Southern Local Suite	TAM foothills			Trachybasalt	17							Goldich, S., Treves, S., Suhr, N. and Stuckless, J., 1975. Geochemistry of the Cenozoic volcanic rocks of Ross Island and vicinity, Antarctica. The Journal of Geology, 83(4): 415-435.	AAS	50	2.36	18.7	2.85	5.42	0.2	2.58	6.37	6.35	3.43	0.99	0.07	0.03		0.15			0.21	0.15						Goldich, S., Treves, S., Suhr, N. and Stuckless, J., 1975. Geochemistry of the Cenozoic volcanic rocks of Ross Island and vicinity, Antarctica. The Journal of Geology, 83(4): 415-435.	AAS	bdl			660	4.2	130	15	bdl		32
Terror Rift Volcanic Field	Dredge	Dredge			TRDR01					64.73		Lee, M. J., Lee, J. I., Kim, T. H., Lee, J. & Nagao, K. (2015). Age, geochemistry and Sr-Nd-Pb isotopic compositions of alkali volcanic rocks from Mt. Melbourne and the western Ross Sea, Antarctica. Geosciences Journal 19, 681-695.	XRF	40.51	2.65	12.58	12.45		0.2	9.81	9.87	3.89	1.83	0.82									4.89					Lee, M. J., Lee, J. I., Kim, T. H., Lee, J. & Nagao, K. (2015). Age, geochemistry and Sr-Nd-Pb isotopic compositions of alkali volcanic rocks from Mt. Melbourne and the western Ross Sea, Antarctica. Geosciences Journal 19, 681-695.	ICPMS				618		114.6			0.5
Terror Rift Volcanic Field	Dredge	Dredge			TRDR02		0.33	0.03	Lee, M. J., Lee, J. I., Kim, T. H., Lee, J. & Nagao, K. (2015). Age, geochemistry and Sr-Nd-Pb isotopic compositions of alkali volcanic rocks from Mt. Melbourne and the western Ross Sea, Antarctica. Geosciences Journal 19, 681-695.	57.37		Lee, M. J., Lee, J. I., Kim, T. H., Lee, J. & Nagao, K. (2015). Age, geochemistry and Sr-Nd-Pb isotopic compositions of alkali volcanic rocks from Mt. Melbourne and the western Ross Sea, Antarctica. Geosciences Journal 19, 681-695.	XRF	42.39	2.93	14.28	12.41		0.17	7.17	11.88	4.97	1.98	0.96									0.55					Lee, M. J., Lee, J. I., Kim, T. H., Lee, J. & Nagao, K. (2015). Age, geochemistry and Sr-Nd-Pb isotopic compositions of alkali volcanic rocks from Mt. Melbourne and the western Ross Sea, Antarctica. Geosciences Journal 19, 681-695.	ICPMS				767		143.5			0.7
Terror Rift Volcanic Field	Dredge	Dredge			TRDR03		0.57	0.05	Lee, M. J., Lee, J. I., Kim, T. H., Lee, J. & Nagao, K. (2015). Age, geochemistry and Sr-Nd-Pb isotopic compositions of alkali volcanic rocks from Mt. Melbourne and the western Ross Sea, Antarctica. Geosciences Journal 19, 681-695.	58.98		Lee, M. J., Lee, J. I., Kim, T. H., Lee, J. & Nagao, K. (2015). Age, geochemistry and Sr-Nd-Pb isotopic compositions of alkali volcanic rocks from Mt. Melbourne and the western Ross Sea, Antarctica. Geosciences Journal 19, 681-695.	XRF	42.11	2.83	13.93	12.44		0.19	7.68	11.89	4.75	1.94	0.91									1.09					Lee, M. J., Lee, J. I., Kim, T. H., Lee, J. & Nagao, K. (2015). Age, geochemistry and Sr-Nd-Pb isotopic compositions of alkali volcanic rocks from Mt. Melbourne and the western Ross Sea, Antarctica. Geosciences Journal 19, 681-695.	ICPMS				800		125.3			0.8
Terror Rift Volcanic Field	Dredge	Dredge			TRDR04		0.46	0.03	Lee, M. J., Lee, J. I., Kim, T. H., Lee, J. & Nagao, K. (2015). Age, geochemistry and Sr-Nd-Pb isotopic compositions of alkali volcanic rocks from Mt. Melbourne and the western Ross Sea, Antarctica. Geosciences Journal 19, 681-695.	57.68		Lee, M. J., Lee, J. I., Kim, T. H., Lee, J. & Nagao, K. (2015). Age, geochemistry and Sr-Nd-Pb isotopic compositions of alkali volcanic rocks from Mt. Melbourne and the western Ross Sea, Antarctica. Geosciences Journal 19, 681-695.	XRF	43.74	3.95	13.19	14.16		0.2	8.28	11.7	2.74	0.96	0.57									0.51					Lee, M. J., Lee, J. I., Kim, T. H., Lee, J. & Nagao, K. (2015). Age, geochemistry and Sr-Nd-Pb isotopic compositions of alkali volcanic rocks from Mt. Melbourne and the western Ross Sea, Antarctica. Geosciences Journal 19, 681-695.	ICPMS				309		90.7			0.4
Terror Rift Volcanic Field	Dredge	Dredge 1			04DRE1-31		0.133	0.024	Rilling, S., Mukasa, S., Wilson, T., Lawver, L. & Hall, C. (2009). New determinations of 40Ar/39Ar isotopic ages and flow volumes for Cenozoic volcanism in the Terror Rift, Ross Sea, Antarctica. Journal of Geophysical Research: Solid Earth 114.			Aviado, K. B., Rilling‐Hall, S., Bryce, J. G. & Mukasa, S. B. (2015). Submarine and subaerial lavas in the West Antarctic Rift System: Temporal record of shifting magma source components from the lithosphere and asthenosphere. Geochemistry, Geophysics, Geosystems 16, 4344-4361.	XRF	41.49	2.68	12.85	14.49		0.27	6.72	10.72	4.92	1.89	1.3																			1031		168		113
Terror Rift Volcanic Field	Dredge	Dredge 1			04DRE1-32		0.122	0.026	Rilling, S., Mukasa, S., Wilson, T., Lawver, L. & Hall, C. (2009). New determinations of 40Ar/39Ar isotopic ages and flow volumes for Cenozoic volcanism in the Terror Rift, Ross Sea, Antarctica. Journal of Geophysical Research: Solid Earth 114.			Aviado, K. B., Rilling‐Hall, S., Bryce, J. G. & Mukasa, S. B. (2015). Submarine and subaerial lavas in the West Antarctic Rift System: Temporal record of shifting magma source components from the lithosphere and asthenosphere. Geochemistry, Geophysics, Geosystems 16, 4344-4361.	XRF	41.86	2.69	12.92	14.54		0.27	6.94	10.64	5.23	1.96	1.32																			898		177		134
Terror Rift Volcanic Field	Dredge	Dredge 2			04DRE2-42		1	0.05	Rilling, S., Mukasa, S., Wilson, T., Lawver, L. & Hall, C. (2009). New determinations of 40Ar/39Ar isotopic ages and flow volumes for Cenozoic volcanism in the Terror Rift, Ross Sea, Antarctica. Journal of Geophysical Research: Solid Earth 114.			Aviado, K. B., Rilling‐Hall, S., Bryce, J. G. & Mukasa, S. B. (2015). Submarine and subaerial lavas in the West Antarctic Rift System: Temporal record of shifting magma source components from the lithosphere and asthenosphere. Geochemistry, Geophysics, Geosystems 16, 4344-4361.	XRF	46.6	2.81	16.89	10.22		0.21	3.77	8.31	4.65	2.61	0.84																			812		168		45
Terror Rift Volcanic Field	Dredge	Dredge 3			04DRE3-56		0.187	0.176	Rilling, S., Mukasa, S., Wilson, T., Lawver, L. & Hall, C. (2009). New determinations of 40Ar/39Ar isotopic ages and flow volumes for Cenozoic volcanism in the Terror Rift, Ross Sea, Antarctica. Journal of Geophysical Research: Solid Earth 114.			Aviado, K. B., Rilling‐Hall, S., Bryce, J. G. & Mukasa, S. B. (2015). Submarine and subaerial lavas in the West Antarctic Rift System: Temporal record of shifting magma source components from the lithosphere and asthenosphere. Geochemistry, Geophysics, Geosystems 16, 4344-4361.	XRF	39.45	2.56	11.84	12.25		0.23	11.27	12.83	3.63	1.77	1.1																			870		152		342
Terror Rift Volcanic Field	Dredge	Dredge 3			04DRE3-59							Aviado, K. B., Rilling‐Hall, S., Bryce, J. G. & Mukasa, S. B. (2015). Submarine and subaerial lavas in the West Antarctic Rift System: Temporal record of shifting magma source components from the lithosphere and asthenosphere. Geochemistry, Geophysics, Geosystems 16, 4344-4361.	XRF	41.14	2.44	12.33	10.68		0.19	10.54	14.24	3.51	1.22	0.76																			657		111		413
Terror Rift Volcanic Field	Dredge	Dredge 3			04DRE3-73		0.089	0.066	Rilling, S., Mukasa, S., Wilson, T., Lawver, L. & Hall, C. (2009). New determinations of 40Ar/39Ar isotopic ages and flow volumes for Cenozoic volcanism in the Terror Rift, Ross Sea, Antarctica. Journal of Geophysical Research: Solid Earth 114.			Aviado, K. B., Rilling‐Hall, S., Bryce, J. G. & Mukasa, S. B. (2015). Submarine and subaerial lavas in the West Antarctic Rift System: Temporal record of shifting magma source components from the lithosphere and asthenosphere. Geochemistry, Geophysics, Geosystems 16, 4344-4361.	XRF	40.41	2.63	12.01	12.43		0.23	11.06	13.31	3.69	1.69	1.19																			869		152		348
Terror Rift Volcanic Field	Dredge	Dredge 3			04DRE4-75		1.93	0.04	Rilling, S., Mukasa, S., Wilson, T., Lawver, L. & Hall, C. (2009). New determinations of 40Ar/39Ar isotopic ages and flow volumes for Cenozoic volcanism in the Terror Rift, Ross Sea, Antarctica. Journal of Geophysical Research: Solid Earth 114.			Aviado, K. B., Rilling‐Hall, S., Bryce, J. G. & Mukasa, S. B. (2015). Submarine and subaerial lavas in the West Antarctic Rift System: Temporal record of shifting magma source components from the lithosphere and asthenosphere. Geochemistry, Geophysics, Geosystems 16, 4344-4361.	XRF	41.11	3.22	12.47	14.08		0.24	8.65	11.37	4.29	0.97	1.17																			664		169		276
Terror Rift Volcanic Field	Dredge	Dredge 4			04DRE4-76		1.92	0.04	Rilling, S., Mukasa, S., Wilson, T., Lawver, L. & Hall, C. (2009). New determinations of 40Ar/39Ar isotopic ages and flow volumes for Cenozoic volcanism in the Terror Rift, Ross Sea, Antarctica. Journal of Geophysical Research: Solid Earth 114.			Aviado, K. B., Rilling‐Hall, S., Bryce, J. G. & Mukasa, S. B. (2015). Submarine and subaerial lavas in the West Antarctic Rift System: Temporal record of shifting magma source components from the lithosphere and asthenosphere. Geochemistry, Geophysics, Geosystems 16, 4344-4361.	XRF	43.66	2.58	12.07	12.39		0.18	13.7	11.76	2.2	0.88	0.45																			326		64		614
Terror Rift Volcanic Field	Dredge	Dredge 5			04DRE5-80		3.94	0.08	Rilling, S., Mukasa, S., Wilson, T., Lawver, L. & Hall, C. (2009). New determinations of 40Ar/39Ar isotopic ages and flow volumes for Cenozoic volcanism in the Terror Rift, Ross Sea, Antarctica. Journal of Geophysical Research: Solid Earth 114.			Aviado, K. B., Rilling‐Hall, S., Bryce, J. G. & Mukasa, S. B. (2015). Submarine and subaerial lavas in the West Antarctic Rift System: Temporal record of shifting magma source components from the lithosphere and asthenosphere. Geochemistry, Geophysics, Geosystems 16, 4344-4361.	XRF	42.19	4	13.17	14.61		0.21	8.33	9.27	3.31	1.73	0.87																			479		119		96
Terror Rift Volcanic Field	Dredge	Dredge 5			04DRE5-81							Aviado, K. B., Rilling‐Hall, S., Bryce, J. G. & Mukasa, S. B. (2015). Submarine and subaerial lavas in the West Antarctic Rift System: Temporal record of shifting magma source components from the lithosphere and asthenosphere. Geochemistry, Geophysics, Geosystems 16, 4344-4361.	XRF	41.56	4.05	11.95	14.23		0.18	10.82	9.88	2.78	1.48	0.88																			415		102		284
Terror Rift Volcanic Field	Dredge	Dredge 5			05DRE5-85		3.73	0.14	Rilling, S., Mukasa, S., Wilson, T., Lawver, L. & Hall, C. (2009). New determinations of 40Ar/39Ar isotopic ages and flow volumes for Cenozoic volcanism in the Terror Rift, Ross Sea, Antarctica. Journal of Geophysical Research: Solid Earth 114.			Aviado, K. B., Rilling‐Hall, S., Bryce, J. G. & Mukasa, S. B. (2015). Submarine and subaerial lavas in the West Antarctic Rift System: Temporal record of shifting magma source components from the lithosphere and asthenosphere. Geochemistry, Geophysics, Geosystems 16, 4344-4361.	XRF	42.57	3.34	11.54	13.88		0.17	12.73	9.94	2.17	1.29	0.67																			363		82		405
Terror Rift Volcanic Field	Dredge	Dredge 5			04DRE5-89							Aviado, K. B., Rilling‐Hall, S., Bryce, J. G. & Mukasa, S. B. (2015). Submarine and subaerial lavas in the West Antarctic Rift System: Temporal record of shifting magma source components from the lithosphere and asthenosphere. Geochemistry, Geophysics, Geosystems 16, 4344-4361.	XRF	41.73	3.62	12.19	14.19		0.19	10.72	9.12	2.92	1.39	0.77																			457		106		292
Terror Rift Volcanic Field	Dredge	Dreadge 6			04DRE6-107		0.506	0.024	Rilling, S., Mukasa, S., Wilson, T., Lawver, L. & Hall, C. (2009). New determinations of 40Ar/39Ar isotopic ages and flow volumes for Cenozoic volcanism in the Terror Rift, Ross Sea, Antarctica. Journal of Geophysical Research: Solid Earth 114.			Aviado, K. B., Rilling‐Hall, S., Bryce, J. G. & Mukasa, S. B. (2015). Submarine and subaerial lavas in the West Antarctic Rift System: Temporal record of shifting magma source components from the lithosphere and asthenosphere. Geochemistry, Geophysics, Geosystems 16, 4344-4361.	XRF	40.24	3.39	13.09	14.59		0.26	4.9	11.54	4.42	2.71	1.42																			1173		198		18
Mount Discovery Volcanic Field	White Island				OU 74803							Cooper, A.F., Adam, L.J., Coulter, R.F., Eby, G.N. and McIntosh, W.C., 2007. Geology, geochronology and geochemistry of a basanitic volcano, White Island, Ross Sea, Antarctica. J. Volcanol. Geotherm. Res., 165: 189-216.	XRF	39.84	5.25	12.95	15.04		0.19	10.06	11.43	2.47	1.06	0.56									0.03	98.88				Cooper, A.F., Adam, L.J., Coulter, R.F., Eby, G.N. and McIntosh, W.C., 2007. Geology, geochronology and geochemistry of a basanitic volcano, White Island, Ross Sea, Antarctica. J. Volcanol. Geotherm. Res., 165: 189-216.	XRF		bdl								87
Mount Discovery Volcanic Field	White Island				OU 74854							Cooper, A.F., Adam, L.J., Coulter, R.F., Eby, G.N. and McIntosh, W.C., 2007. Geology, geochronology and geochemistry of a basanitic volcano, White Island, Ross Sea, Antarctica. J. Volcanol. Geotherm. Res., 165: 189-216.	XRF	41.59	3.67	12.31	13.55		0.2	11.93	10.77	3.51	1.31	0.87									− 0.48	99.23				Cooper, A.F., Adam, L.J., Coulter, R.F., Eby, G.N. and McIntosh, W.C., 2007. Geology, geochronology and geochemistry of a basanitic volcano, White Island, Ross Sea, Antarctica. J. Volcanol. Geotherm. Res., 165: 189-216.	XRF		2								51
Mount Discovery Volcanic Field	White Island				OU 74790							Cooper, A.F., Adam, L.J., Coulter, R.F., Eby, G.N. and McIntosh, W.C., 2007. Geology, geochronology and geochemistry of a basanitic volcano, White Island, Ross Sea, Antarctica. J. Volcanol. Geotherm. Res., 165: 189-216.	XRF	41.7	3.42	12.87	12.25		0.18	11.45	11.98	3.23	1.09	0.74									0.46	99.37				Cooper, A.F., Adam, L.J., Coulter, R.F., Eby, G.N. and McIntosh, W.C., 2007. Geology, geochronology and geochemistry of a basanitic volcano, White Island, Ross Sea, Antarctica. J. Volcanol. Geotherm. Res., 165: 189-216.	XRF		bdl								69
Mount Discovery Volcanic Field	White Island				OU 74859							Cooper, A.F., Adam, L.J., Coulter, R.F., Eby, G.N. and McIntosh, W.C., 2007. Geology, geochronology and geochemistry of a basanitic volcano, White Island, Ross Sea, Antarctica. J. Volcanol. Geotherm. Res., 165: 189-216.	XRF	41.93	3.78	14.35	12.49		0.2	8.6	10.89	3.95	2.17	0.95									− 0.05	99.23				Cooper, A.F., Adam, L.J., Coulter, R.F., Eby, G.N. and McIntosh, W.C., 2007. Geology, geochronology and geochemistry of a basanitic volcano, White Island, Ross Sea, Antarctica. J. Volcanol. Geotherm. Res., 165: 189-216.	XRF		1								65
Mount Discovery Volcanic Field	White Island				OU 74849							Cooper, A.F., Adam, L.J., Coulter, R.F., Eby, G.N. and McIntosh, W.C., 2007. Geology, geochronology and geochemistry of a basanitic volcano, White Island, Ross Sea, Antarctica. J. Volcanol. Geotherm. Res., 165: 189-216.	XRF	41.96	3.9	13.97	12.66		0.19	9.27	11.32	3.95	1.69	0.91									− 0.21	99.61				Cooper, A.F., Adam, L.J., Coulter, R.F., Eby, G.N. and McIntosh, W.C., 2007. Geology, geochronology and geochemistry of a basanitic volcano, White Island, Ross Sea, Antarctica. J. Volcanol. Geotherm. Res., 165: 189-216.	XRF		1								74
Mount Discovery Volcanic Field	White Island				OU 74798							Cooper, A.F., Adam, L.J., Coulter, R.F., Eby, G.N. and McIntosh, W.C., 2007. Geology, geochronology and geochemistry of a basanitic volcano, White Island, Ross Sea, Antarctica. J. Volcanol. Geotherm. Res., 165: 189-216.	XRF	42.04	4.1	13.85	13.07		0.2	8.67	10.39	4.07	1.84	1.28									0.33	99.84				Cooper, A.F., Adam, L.J., Coulter, R.F., Eby, G.N. and McIntosh, W.C., 2007. Geology, geochronology and geochemistry of a basanitic volcano, White Island, Ross Sea, Antarctica. J. Volcanol. Geotherm. Res., 165: 189-216.	XRF		bdl								40
Mount Discovery Volcanic Field	White Island				OU 74858							Cooper, A.F., Adam, L.J., Coulter, R.F., Eby, G.N. and McIntosh, W.C., 2007. Geology, geochronology and geochemistry of a basanitic volcano, White Island, Ross Sea, Antarctica. J. Volcanol. Geotherm. Res., 165: 189-216.	XRF	42.05	3.62	12.51	13.4		0.2	11.83	10.89	3.5	1.33	0.91									− 0.49	99.75				Cooper, A.F., Adam, L.J., Coulter, R.F., Eby, G.N. and McIntosh, W.C., 2007. Geology, geochronology and geochemistry of a basanitic volcano, White Island, Ross Sea, Antarctica. J. Volcanol. Geotherm. Res., 165: 189-216.	XRF		2								56
Mount Discovery Volcanic Field	White Island	White Island		Basanitoid	2							Goldich, S., Treves, S., Suhr, N. and Stuckless, J., 1975. Geochemistry of the Cenozoic volcanic rocks of Ross Island and vicinity, Antarctica. The Journal of Geology, 83(4): 415-435.	AAS	42.1	3.57	13	3.37	8.9	0.19	11.8	11.5	3.7	0.9	0.81	0.04	0.02		0.11	0.04		0.45	0.04						Goldich, S., Treves, S., Suhr, N. and Stuckless, J., 1975. Geochemistry of the Cenozoic volcanic rocks of Ross Island and vicinity, Antarctica. The Journal of Geology, 83(4): 415-435.	AAS	1.1			380	3	bdl	56	600		57
Mount Discovery Volcanic Field	White Island				OU 74853	5.04						Cooper, A.F., Adam, L.J., Coulter, R.F., Eby, G.N. and McIntosh, W.C., 2007. Geology, geochronology and geochemistry of a basanitic volcano, White Island, Ross Sea, Antarctica. J. Volcanol. Geotherm. Res., 165: 189-216.	XRF	42.22	3.34	13.47	12.58		0.19	11.42	11.92	3.06	1.22	0.6									− 0.16	99.86				Cooper, A.F., Adam, L.J., Coulter, R.F., Eby, G.N. and McIntosh, W.C., 2007. Geology, geochronology and geochemistry of a basanitic volcano, White Island, Ross Sea, Antarctica. J. Volcanol. Geotherm. Res., 165: 189-216.	XRF		1								69
Mount Discovery Volcanic Field	White Island				OU 74801							Cooper, A.F., Adam, L.J., Coulter, R.F., Eby, G.N. and McIntosh, W.C., 2007. Geology, geochronology and geochemistry of a basanitic volcano, White Island, Ross Sea, Antarctica. J. Volcanol. Geotherm. Res., 165: 189-216.	XRF	42.29	4.02	13.91	12.66		0.2	8.78	10.36	4.27	1.45	1.18									0.1	99.22				Cooper, A.F., Adam, L.J., Coulter, R.F., Eby, G.N. and McIntosh, W.C., 2007. Geology, geochronology and geochemistry of a basanitic volcano, White Island, Ross Sea, Antarctica. J. Volcanol. Geotherm. Res., 165: 189-216.	XRF		1								57
Mount Discovery Volcanic Field	White Island				OU 74796							Cooper, A.F., Adam, L.J., Coulter, R.F., Eby, G.N. and McIntosh, W.C., 2007. Geology, geochronology and geochemistry of a basanitic volcano, White Island, Ross Sea, Antarctica. J. Volcanol. Geotherm. Res., 165: 189-216.	XRF	42.3	3.92	14.82	13.35		0.21	7.38	10.32	4.22	1.87	1									0.32	99.71				Cooper, A.F., Adam, L.J., Coulter, R.F., Eby, G.N. and McIntosh, W.C., 2007. Geology, geochronology and geochemistry of a basanitic volcano, White Island, Ross Sea, Antarctica. J. Volcanol. Geotherm. Res., 165: 189-216.	XRF		1								62
Mount Discovery Volcanic Field	White Island				OU 74791	3.29						Cooper, A.F., Adam, L.J., Coulter, R.F., Eby, G.N. and McIntosh, W.C., 2007. Geology, geochronology and geochemistry of a basanitic volcano, White Island, Ross Sea, Antarctica. J. Volcanol. Geotherm. Res., 165: 189-216.	XRF	42.41	3.99	15.08	13.41		0.22	6.79	10.34	4.26	2.09	1.04									0.46	100.09				Cooper, A.F., Adam, L.J., Coulter, R.F., Eby, G.N. and McIntosh, W.C., 2007. Geology, geochronology and geochemistry of a basanitic volcano, White Island, Ross Sea, Antarctica. J. Volcanol. Geotherm. Res., 165: 189-216.	XRF		1								56
Mount Discovery Volcanic Field	White Island				OU 74852							Cooper, A.F., Adam, L.J., Coulter, R.F., Eby, G.N. and McIntosh, W.C., 2007. Geology, geochronology and geochemistry of a basanitic volcano, White Island, Ross Sea, Antarctica. J. Volcanol. Geotherm. Res., 165: 189-216.	XRF	42.46	3.29	13.57	12.41		0.2	11.14	12.28	2.91	1.13	0.52									− 0.20	99.71				Cooper, A.F., Adam, L.J., Coulter, R.F., Eby, G.N. and McIntosh, W.C., 2007. Geology, geochronology and geochemistry of a basanitic volcano, White Island, Ross Sea, Antarctica. J. Volcanol. Geotherm. Res., 165: 189-216.	XRF		1								77
Mount Discovery Volcanic Field	White Island				OU 75034							Cooper, A.F., Adam, L.J., Coulter, R.F., Eby, G.N. and McIntosh, W.C., 2007. Geology, geochronology and geochemistry of a basanitic volcano, White Island, Ross Sea, Antarctica. J. Volcanol. Geotherm. Res., 165: 189-216.	XRF	42.49	3.82	12.93	11.9		0.17	11.68	11.67	2.87	1.55	0.74									0.51	100.33				Cooper, A.F., Adam, L.J., Coulter, R.F., Eby, G.N. and McIntosh, W.C., 2007. Geology, geochronology and geochemistry of a basanitic volcano, White Island, Ross Sea, Antarctica. J. Volcanol. Geotherm. Res., 165: 189-216.	XRF		1								73
Mount Discovery Volcanic Field	White Island				OU 74892							Cooper, A.F., Adam, L.J., Coulter, R.F., Eby, G.N. and McIntosh, W.C., 2007. Geology, geochronology and geochemistry of a basanitic volcano, White Island, Ross Sea, Antarctica. J. Volcanol. Geotherm. Res., 165: 189-216.	XRF	42.49	4.19	13.47	11.47		0.17	11.13	10.57	4.12	0.98	0.87									0.26	99.73				Cooper, A.F., Adam, L.J., Coulter, R.F., Eby, G.N. and McIntosh, W.C., 2007. Geology, geochronology and geochemistry of a basanitic volcano, White Island, Ross Sea, Antarctica. J. Volcanol. Geotherm. Res., 165: 189-216.	XRF		2								51
Mount Discovery Volcanic Field	White Island				OU 74802	2.11						Cooper, A.F., Adam, L.J., Coulter, R.F., Eby, G.N. and McIntosh, W.C., 2007. Geology, geochronology and geochemistry of a basanitic volcano, White Island, Ross Sea, Antarctica. J. Volcanol. Geotherm. Res., 165: 189-216.	XRF	42.56	3.79	14.82	14.23		0.23	6.52	9.35	4.67	2.08	1.16									0.36	99.77				Cooper, A.F., Adam, L.J., Coulter, R.F., Eby, G.N. and McIntosh, W.C., 2007. Geology, geochronology and geochemistry of a basanitic volcano, White Island, Ross Sea, Antarctica. J. Volcanol. Geotherm. Res., 165: 189-216.	XRF		3								44
Mount Discovery Volcanic Field	White Island				OU 74785							Cooper, A.F., Adam, L.J., Coulter, R.F., Eby, G.N. and McIntosh, W.C., 2007. Geology, geochronology and geochemistry of a basanitic volcano, White Island, Ross Sea, Antarctica. J. Volcanol. Geotherm. Res., 165: 189-216.	XRF	42.61	3.22	12.88	12.21		0.19	12.01	11.49	3.21	1.13	0.68									0.43	100.06				Cooper, A.F., Adam, L.J., Coulter, R.F., Eby, G.N. and McIntosh, W.C., 2007. Geology, geochronology and geochemistry of a basanitic volcano, White Island, Ross Sea, Antarctica. J. Volcanol. Geotherm. Res., 165: 189-216.	XRF		2								85
Mount Discovery Volcanic Field	White Island				OU 74893							Cooper, A.F., Adam, L.J., Coulter, R.F., Eby, G.N. and McIntosh, W.C., 2007. Geology, geochronology and geochemistry of a basanitic volcano, White Island, Ross Sea, Antarctica. J. Volcanol. Geotherm. Res., 165: 189-216.	XRF	42.65	4.34	15.59	11.59		0.18	6.9	10.61	4.17	2.28	1.02									− 0.06	99.27				Cooper, A.F., Adam, L.J., Coulter, R.F., Eby, G.N. and McIntosh, W.C., 2007. Geology, geochronology and geochemistry of a basanitic volcano, White Island, Ross Sea, Antarctica. J. Volcanol. Geotherm. Res., 165: 189-216.	XRF		1								67
Mount Discovery Volcanic Field	White Island	White Island		Basanitoid	4							Goldich, S., Treves, S., Suhr, N. and Stuckless, J., 1975. Geochemistry of the Cenozoic volcanic rocks of Ross Island and vicinity, Antarctica. The Journal of Geology, 83(4): 415-435.	AAS	42.7	3.27	12.8	3.1	7.96	0.19	12.7	12.5	2.85	0.96	0.63	0.03	bdl		0.09	0.04		0.13	0.04						Goldich, S., Treves, S., Suhr, N. and Stuckless, J., 1975. Geochemistry of the Cenozoic volcanic rocks of Ross Island and vicinity, Antarctica. The Journal of Geology, 83(4): 415-435.	AAS	1.2			300	2.4	bdl	54	870		56
Mount Discovery Volcanic Field	White Island				OU 74856							Cooper, A.F., Adam, L.J., Coulter, R.F., Eby, G.N. and McIntosh, W.C., 2007. Geology, geochronology and geochemistry of a basanitic volcano, White Island, Ross Sea, Antarctica. J. Volcanol. Geotherm. Res., 165: 189-216.	XRF	42.72	3.98	14.83	13.95		0.23	7.2	9.61	4.48	1.83	1.06									− 0.22	99.67				Cooper, A.F., Adam, L.J., Coulter, R.F., Eby, G.N. and McIntosh, W.C., 2007. Geology, geochronology and geochemistry of a basanitic volcano, White Island, Ross Sea, Antarctica. J. Volcanol. Geotherm. Res., 165: 189-216.	XRF		bdl								44
Mount Discovery Volcanic Field	White Island				OU 74797							Cooper, A.F., Adam, L.J., Coulter, R.F., Eby, G.N. and McIntosh, W.C., 2007. Geology, geochronology and geochemistry of a basanitic volcano, White Island, Ross Sea, Antarctica. J. Volcanol. Geotherm. Res., 165: 189-216.	XRF	43.29	3.07	15	11.62		0.2	8.81	10.59	4.23	1.82	0.85									0.15	99.63				Cooper, A.F., Adam, L.J., Coulter, R.F., Eby, G.N. and McIntosh, W.C., 2007. Geology, geochronology and geochemistry of a basanitic volcano, White Island, Ross Sea, Antarctica. J. Volcanol. Geotherm. Res., 165: 189-216.	XRF		1								55
Mount Discovery Volcanic Field	White Island				OU 74804							Cooper, A.F., Adam, L.J., Coulter, R.F., Eby, G.N. and McIntosh, W.C., 2007. Geology, geochronology and geochemistry of a basanitic volcano, White Island, Ross Sea, Antarctica. J. Volcanol. Geotherm. Res., 165: 189-216.	XRF	43.58	3.5	15.24	14.24		0.25	5.15	8.27	5.2	2.49	1.27									0.32	99.51				Cooper, A.F., Adam, L.J., Coulter, R.F., Eby, G.N. and McIntosh, W.C., 2007. Geology, geochronology and geochemistry of a basanitic volcano, White Island, Ross Sea, Antarctica. J. Volcanol. Geotherm. Res., 165: 189-216.	XRF		2								32
Mount Discovery Volcanic Field	White Island				OU 74799	4.68						Cooper, A.F., Adam, L.J., Coulter, R.F., Eby, G.N. and McIntosh, W.C., 2007. Geology, geochronology and geochemistry of a basanitic volcano, White Island, Ross Sea, Antarctica. J. Volcanol. Geotherm. Res., 165: 189-216.	XRF	44.52	3.22	16.8	11.65		0.21	5.01	9.45	5.26	2.19	0.97									0.04	99.32				Cooper, A.F., Adam, L.J., Coulter, R.F., Eby, G.N. and McIntosh, W.C., 2007. Geology, geochronology and geochemistry of a basanitic volcano, White Island, Ross Sea, Antarctica. J. Volcanol. Geotherm. Res., 165: 189-216.	XRF		1								48
Mount Discovery Volcanic Field	White Island				OU 74862							Cooper, A.F., Adam, L.J., Coulter, R.F., Eby, G.N. and McIntosh, W.C., 2007. Geology, geochronology and geochemistry of a basanitic volcano, White Island, Ross Sea, Antarctica. J. Volcanol. Geotherm. Res., 165: 189-216.	XRF	45.04	3.54	15.81	12.8		0.23	5.05	7.7	5.78	2.67	0.81									0.3	99.13				Cooper, A.F., Adam, L.J., Coulter, R.F., Eby, G.N. and McIntosh, W.C., 2007. Geology, geochronology and geochemistry of a basanitic volcano, White Island, Ross Sea, Antarctica. J. Volcanol. Geotherm. Res., 165: 189-216.	XRF		1								33
Mount Discovery Volcanic Field	White Island				OU 74848							Cooper, A.F., Adam, L.J., Coulter, R.F., Eby, G.N. and McIntosh, W.C., 2007. Geology, geochronology and geochemistry of a basanitic volcano, White Island, Ross Sea, Antarctica. J. Volcanol. Geotherm. Res., 165: 189-216.	XRF	55.16	1.24	19.32	6.96		0.2	1.44	3.87	8.26	3.98	0.42									− 0.06	100.79				Cooper, A.F., Adam, L.J., Coulter, R.F., Eby, G.N. and McIntosh, W.C., 2007. Geology, geochronology and geochemistry of a basanitic volcano, White Island, Ross Sea, Antarctica. J. Volcanol. Geotherm. Res., 165: 189-216.	XRF		7								13
Ross Island Volcanic Field	Ross Island	Bird			RI117x2							Phillips, E. H., Sims, K. W. W., Blichert-Toft, J., Aster, R. C., Gaetani, G. A., Kyle, P. R., Wallace, P. J. & Rasmussen, D. J. (2018). The nature and evolution of mantle upwelling at Ross Island, Antarctica, with implications for the source of HIMU lavas. Earth and Planetary Science Letters 498, 38-53.	XRF	41.39	3.43	12.74	13.17	11.8505	0.19	10.06	11.27	2.8	1.54	0.74														Phillips, E. H., Sims, K. W. W., Blichert-Toft, J., Aster, R. C., Gaetani, G. A., Kyle, P. R., Wallace, P. J. & Rasmussen, D. J. (2018). The nature and evolution of mantle upwelling at Ross Island, Antarctica, with implications for the source of HIMU lavas. Earth and Planetary Science Letters 498, 38-53.	LA-ICPMS				403.695		105.672	58.2124	412.59	0.305688
Ross Island Volcanic Field	Ross Island	Bird			RI115							Phillips, E. H., Sims, K. W. W., Blichert-Toft, J., Aster, R. C., Gaetani, G. A., Kyle, P. R., Wallace, P. J. & Rasmussen, D. J. (2018). The nature and evolution of mantle upwelling at Ross Island, Antarctica, with implications for the source of HIMU lavas. Earth and Planetary Science Letters 498, 38-53.	XRF	41.4	3.45	12.92	13.22	11.8955	0.19	10.64	11.3	3.21	1.51	0.76														Phillips, E. H., Sims, K. W. W., Blichert-Toft, J., Aster, R. C., Gaetani, G. A., Kyle, P. R., Wallace, P. J. & Rasmussen, D. J. (2018). The nature and evolution of mantle upwelling at Ross Island, Antarctica, with implications for the source of HIMU lavas. Earth and Planetary Science Letters 498, 38-53.	LA-ICPMS				444.639		107.19	56.8574	383.824	0.347686
Ross Island Volcanic Field	Ross Island	Bird			Aver							Phillips, E. H., Sims, K. W. W., Blichert-Toft, J., Aster, R. C., Gaetani, G. A., Kyle, P. R., Wallace, P. J. & Rasmussen, D. J. (2018). The nature and evolution of mantle upwelling at Ross Island, Antarctica, with implications for the source of HIMU lavas. Earth and Planetary Science Letters 498, 38-53.	XRF	41.455	3.45	12.775	13.235	11.909	0.19	10.08	11.31	2.8	1.545	0.74														Phillips, E. H., Sims, K. W. W., Blichert-Toft, J., Aster, R. C., Gaetani, G. A., Kyle, P. R., Wallace, P. J. & Rasmussen, D. J. (2018). The nature and evolution of mantle upwelling at Ross Island, Antarctica, with implications for the source of HIMU lavas. Earth and Planetary Science Letters 498, 38-53.	LA-ICPMS				402.997		105.268	58.0235	412.828	0.306478
Ross Island Volcanic Field	Ross Island	Bird			RI117							Phillips, E. H., Sims, K. W. W., Blichert-Toft, J., Aster, R. C., Gaetani, G. A., Kyle, P. R., Wallace, P. J. & Rasmussen, D. J. (2018). The nature and evolution of mantle upwelling at Ross Island, Antarctica, with implications for the source of HIMU lavas. Earth and Planetary Science Letters 498, 38-53.	XRF	41.52	3.47	12.81	13.3	11.9675	0.19	10.1	11.35	2.8	1.55	0.74														Phillips, E. H., Sims, K. W. W., Blichert-Toft, J., Aster, R. C., Gaetani, G. A., Kyle, P. R., Wallace, P. J. & Rasmussen, D. J. (2018). The nature and evolution of mantle upwelling at Ross Island, Antarctica, with implications for the source of HIMU lavas. Earth and Planetary Science Letters 498, 38-53.	LA-ICPMS				402.299		104.863	57.8345	413.066	0.307268
Ross Island Volcanic Field	Ross Island	Bird			AAH							Phillips, E. H., Sims, K. W. W., Blichert-Toft, J., Aster, R. C., Gaetani, G. A., Kyle, P. R., Wallace, P. J. & Rasmussen, D. J. (2018). The nature and evolution of mantle upwelling at Ross Island, Antarctica, with implications for the source of HIMU lavas. Earth and Planetary Science Letters 498, 38-53.	XRF	41.65	4.13	14.24	14.76	13.2812	0.21	7.68	9.91	4.01	1.81	0.91														Phillips, E. H., Sims, K. W. W., Blichert-Toft, J., Aster, R. C., Gaetani, G. A., Kyle, P. R., Wallace, P. J. & Rasmussen, D. J. (2018). The nature and evolution of mantle upwelling at Ross Island, Antarctica, with implications for the source of HIMU lavas. Earth and Planetary Science Letters 498, 38-53.	LA-ICPMS				499.505		136.067		137.554	0.375248
Ross Island Volcanic Field	Ross Island	Bird			AAE							This work (PRK)	XRF	42.85	3.19	15.83	13.42	12.0755	0.22	5.58	10.25	4.68	1.12	0.85														This work (PRK)	LA-ICPMS				445.221		123.833		55.5669	0.395023
Ross Island Volcanic Field	Ross Island	Bird			RI93							Phillips, E. H., Sims, K. W. W., Blichert-Toft, J., Aster, R. C., Gaetani, G. A., Kyle, P. R., Wallace, P. J. & Rasmussen, D. J. (2018). The nature and evolution of mantle upwelling at Ross Island, Antarctica, with implications for the source of HIMU lavas. Earth and Planetary Science Letters 498, 38-53.	XRF	42.88	2.67	14.04	12.9	11.6075	0.21	10.04	9.63	3.8	1.28	0.57														Phillips, E. H., Sims, K. W. W., Blichert-Toft, J., Aster, R. C., Gaetani, G. A., Kyle, P. R., Wallace, P. J. & Rasmussen, D. J. (2018). The nature and evolution of mantle upwelling at Ross Island, Antarctica, with implications for the source of HIMU lavas. Earth and Planetary Science Letters 498, 38-53.	LA-ICPMS				441.464		111.843	53.0255	247.324	0.395204
Ross Island Volcanic Field	Ross Island	Bird			AAF							This work (PRK)	XRF	43.03	3.21	15.83	13.42	12.0755	0.21	5.57	10.32	4.2	1.62	0.84														This work (PRK)	LA-ICPMS				435.795		121.062		57.4604	0.324844
Ross Island Volcanic Field	Ross Island	Bird			AAB							This work (PRK)	XRF	43.04	3.21	15.89	13.43	12.0844	0.22	5.51	10.18	4.73	1.02	0.84														This work (PRK)	LA-ICPMS				462.073		127.788		49.0431	0.385237
Ross Island Volcanic Field	Ross Island	Bird			AAD							This work (PRK)	XRF	43.1	3.24	15.98	13.55	12.1924	0.22	5.55	10.37	4.3	1.69	0.82														This work (PRK)	LA-ICPMS				450.41		124.015		48.7705	0.390256
Ross Island Volcanic Field	Ross Island	Bird			Aver							Phillips et al., 2018	XRF	43.145	2.69	14.1	12.995	11.693	0.21	10.075	9.69	3.82	1.285	0.57														Phillips, E. H., Sims, K. W. W., Blichert-Toft, J., Aster, R. C., Gaetani, G. A., Kyle, P. R., Wallace, P. J. & Rasmussen, D. J. (2018). The nature and evolution of mantle upwelling at Ross Island, Antarctica, with implications for the source of HIMU lavas. Earth and Planetary Science Letters 498, 38-53.	LA-ICPMS				440.734		111.034	53.6864	249.432	0.405118
Ross Island Volcanic Field	Ross Island	Bird			RI85							Rasmussen et al., 2016	XRF	43.32	3.24	15.91	13.65	12.2824	0.21	5.79	10.83	3.99	1.53	0.75														Rasmussen et al., 2016	LA-ICPMS				418.499		108.577	41.435	64.3517	0.376227
Ross Island Volcanic Field	Ross Island	Bird			RI93x2							Phillips, E. H., Sims, K. W. W., Blichert-Toft, J., Aster, R. C., Gaetani, G. A., Kyle, P. R., Wallace, P. J. & Rasmussen, D. J. (2018). The nature and evolution of mantle upwelling at Ross Island, Antarctica, with implications for the source of HIMU lavas. Earth and Planetary Science Letters 498, 38-53.	XRF	43.41	2.71	14.16	13.09	11.7785	0.21	10.11	9.75	3.84	1.29	0.57														Phillips, E. H., Sims, K. W. W., Blichert-Toft, J., Aster, R. C., Gaetani, G. A., Kyle, P. R., Wallace, P. J. & Rasmussen, D. J. (2018). The nature and evolution of mantle upwelling at Ross Island, Antarctica, with implications for the source of HIMU lavas. Earth and Planetary Science Letters 498, 38-53.	LA-ICPMS				440.003		110.224	54.3473	251.54	0.415032
Ross Island Volcanic Field	Ross Island	Bird			RI84							Phillips, E. H., Sims, K. W. W., Blichert-Toft, J., Aster, R. C., Gaetani, G. A., Kyle, P. R., Wallace, P. J. & Rasmussen, D. J. (2018). The nature and evolution of mantle upwelling at Ross Island, Antarctica, with implications for the source of HIMU lavas. Earth and Planetary Science Letters 498, 38-53.	XRF	43.5	3.26	16.08	13.72	12.3454	0.21	5.83	10.78	3.99	1.56	0.77														Phillips, E. H., Sims, K. W. W., Blichert-Toft, J., Aster, R. C., Gaetani, G. A., Kyle, P. R., Wallace, P. J. & Rasmussen, D. J. (2018). The nature and evolution of mantle upwelling at Ross Island, Antarctica, with implications for the source of HIMU lavas. Earth and Planetary Science Letters 498, 38-53.	LA-ICPMS				456		116	44.4	67.9	0.43
Ross Island Volcanic Field	Ross Island	Bird			AAC							This work (PRK)	XRF	43.52	3.3	15.97	13.88	12.4894	0.22	5.78	10.48	4.31	1.43	0.83														This work (PRK)	LA-ICPMS				432.239		119.103		64.9524	0.367619
Ross Island Volcanic Field	Ross Island	Bird			AAG							This work (PRK)	XRF	43.79	3.2	16.01	13.5	12.1474	0.21	5.71	10.67	4.41	1.3	0.73														This work (PRK)	LA-ICPMS				421.394		113.575		69.5869	0.356834
Ross Island Volcanic Field	Ross Island	Bird			RI103							Phillips, E. H., Sims, K. W. W., Blichert-Toft, J., Aster, R. C., Gaetani, G. A., Kyle, P. R., Wallace, P. J. & Rasmussen, D. J. (2018). The nature and evolution of mantle upwelling at Ross Island, Antarctica, with implications for the source of HIMU lavas. Earth and Planetary Science Letters 498, 38-53.	XRF	44.38	2.91	15.52	12.18	10.9597	0.21	6.45	11	4.33	2.18	0.67														Phillips, E. H., Sims, K. W. W., Blichert-Toft, J., Aster, R. C., Gaetani, G. A., Kyle, P. R., Wallace, P. J. & Rasmussen, D. J. (2018). The nature and evolution of mantle upwelling at Ross Island, Antarctica, with implications for the source of HIMU lavas. Earth and Planetary Science Letters 498, 38-53.	LA-ICPMS				695.933		125.15	41.786	190.8	0.524762
Ross Island Volcanic Field	Ross Island	Bird			RI102							Phillips, E. H., Sims, K. W. W., Blichert-Toft, J., Aster, R. C., Gaetani, G. A., Kyle, P. R., Wallace, P. J. & Rasmussen, D. J. (2018). The nature and evolution of mantle upwelling at Ross Island, Antarctica, with implications for the source of HIMU lavas. Earth and Planetary Science Letters 498, 38-53.	XRF	44.41	2.9	15.46	12.12	10.9057	0.21	6.37	11.06	4.54	1.73	0.66														Phillips, E. H., Sims, K. W. W., Blichert-Toft, J., Aster, R. C., Gaetani, G. A., Kyle, P. R., Wallace, P. J. & Rasmussen, D. J. (2018). The nature and evolution of mantle upwelling at Ross Island, Antarctica, with implications for the source of HIMU lavas. Earth and Planetary Science Letters 498, 38-53.	LA-ICPMS				666.29		124.151	38.3413	182.964	0.486239
Ross Island Volcanic Field	Ross Island	Bird			RI113							Phillips, E. H., Sims, K. W. W., Blichert-Toft, J., Aster, R. C., Gaetani, G. A., Kyle, P. R., Wallace, P. J. & Rasmussen, D. J. (2018). The nature and evolution of mantle upwelling at Ross Island, Antarctica, with implications for the source of HIMU lavas. Earth and Planetary Science Letters 498, 38-53.	XRF	44.69	2.67	15.06	12.34	11.1037	0.23	7.09	9.48	4.99	1.93	0.75														Phillips, E. H., Sims, K. W. W., Blichert-Toft, J., Aster, R. C., Gaetani, G. A., Kyle, P. R., Wallace, P. J. & Rasmussen, D. J. (2018). The nature and evolution of mantle upwelling at Ross Island, Antarctica, with implications for the source of HIMU lavas. Earth and Planetary Science Letters 498, 38-53.	LA-ICPMS				671.289		161.127	40.1681	205.932	0.629076
Ross Island Volcanic Field	Ross Island	Bird			RI97							Phillips, E. H., Sims, K. W. W., Blichert-Toft, J., Aster, R. C., Gaetani, G. A., Kyle, P. R., Wallace, P. J. & Rasmussen, D. J. (2018). The nature and evolution of mantle upwelling at Ross Island, Antarctica, with implications for the source of HIMU lavas. Earth and Planetary Science Letters 498, 38-53.	XRF	46.37	2.62	17.55	11.5	10.3478	0.24	3.7	8.22	5.25	2.24	0.81														Phillips, E. H., Sims, K. W. W., Blichert-Toft, J., Aster, R. C., Gaetani, G. A., Kyle, P. R., Wallace, P. J. & Rasmussen, D. J. (2018). The nature and evolution of mantle upwelling at Ross Island, Antarctica, with implications for the source of HIMU lavas. Earth and Planetary Science Letters 498, 38-53.	LA-ICPMS				660.834		156.686	26.7962	4.41704	0.665145
Ross Island Volcanic Field	Ross Island	Bird			RI98T							Phillips, E. H., Sims, K. W. W., Blichert-Toft, J., Aster, R. C., Gaetani, G. A., Kyle, P. R., Wallace, P. J. & Rasmussen, D. J. (2018). The nature and evolution of mantle upwelling at Ross Island, Antarctica, with implications for the source of HIMU lavas. Earth and Planetary Science Letters 498, 38-53.	XRF	46.55	2.51	17.03	11.4	10.2578	0.23	4.54	8.35	4.95	2.21	0.75														Phillips, E. H., Sims, K. W. W., Blichert-Toft, J., Aster, R. C., Gaetani, G. A., Kyle, P. R., Wallace, P. J. & Rasmussen, D. J. (2018). The nature and evolution of mantle upwelling at Ross Island, Antarctica, with implications for the source of HIMU lavas. Earth and Planetary Science Letters 498, 38-53.	LA-ICPMS				605.312		148.336	28.6455	93.6075	0.564815
Ross Island Volcanic Field	Ross Island	Bird		Phyrohornblende Trachyte	-							Jensen, H. I. (1916). Report on the petrology of the alkaline rocks of Mount Erebus, Antarctica. London: Heinemann.	XRF	52.54	1.44	19.41	2.9	5.31	0.23	1.91	4.6	7.5	3.49	0.26		0.2					0.24							Jensen, H. I. (1916). Report on the petrology of the alkaline rocks of Mount Erebus, Antarctica. London: Heinemann.	-
Ross Island Volcanic Field	Ross Island	Bird			AAK							This work (PRK)	XRF	52.9	1.08	18.43	7.57	6.81156	0.22	1.43	4	8.05	3.74	0.5														This work (PRK)	LA-ICPMS				783.848		234.582		8.56482	1.04975
Ross Island Volcanic Field	Ross Island	Bird			AAA							This work (PRK)	XRF	52.92	1.18	17.48	8.06	7.25247	0.23	2.55	5.2	7.08	3.4	0.32														This work (PRK)	LA-ICPMS				813.212		157.138		105.292	0.761019
Ross Island Volcanic Field	Ross Island	Bird			LB02I							Phillips, E. H., Sims, K. W. W., Blichert-Toft, J., Aster, R. C., Gaetani, G. A., Kyle, P. R., Wallace, P. J. & Rasmussen, D. J. (2018). The nature and evolution of mantle upwelling at Ross Island, Antarctica, with implications for the source of HIMU lavas. Earth and Planetary Science Letters 498, 38-53.	XRF	55.29	0.83	18.83	6	5.39886	0.2	0.85	3.17	7.6	4.71	0.21														Phillips, E. H., Sims, K. W. W., Blichert-Toft, J., Aster, R. C., Gaetani, G. A., Kyle, P. R., Wallace, P. J. & Rasmussen, D. J. (2018). The nature and evolution of mantle upwelling at Ross Island, Antarctica, with implications for the source of HIMU lavas. Earth and Planetary Science Letters 498, 38-53.	LA-ICPMS				886.502		146.533	6.421	< d.l.	0.961324
Ross Island Volcanic Field	Ross Island	Bird			Aver							Phillips, E. H., Sims, K. W. W., Blichert-Toft, J., Aster, R. C., Gaetani, G. A., Kyle, P. R., Wallace, P. J. & Rasmussen, D. J. (2018). The nature and evolution of mantle upwelling at Ross Island, Antarctica, with implications for the source of HIMU lavas. Earth and Planetary Science Letters 498, 38-53.	XRF	55.37	0.83	18.84	5.995	5.39436	0.2	0.85	3.17	7.605	4.71	0.21														Phillips, E. H., Sims, K. W. W., Blichert-Toft, J., Aster, R. C., Gaetani, G. A., Kyle, P. R., Wallace, P. J. & Rasmussen, D. J. (2018). The nature and evolution of mantle upwelling at Ross Island, Antarctica, with implications for the source of HIMU lavas. Earth and Planetary Science Letters 498, 38-53.	LA-ICPMS				882.398		145.738	6.4146		0.954571
Ross Island Volcanic Field	Ross Island	Bird			LB02Ix2							Phillips, E. H., Sims, K. W. W., Blichert-Toft, J., Aster, R. C., Gaetani, G. A., Kyle, P. R., Wallace, P. J. & Rasmussen, D. J. (2018). The nature and evolution of mantle upwelling at Ross Island, Antarctica, with implications for the source of HIMU lavas. Earth and Planetary Science Letters 498, 38-53.	XRF	55.45	0.83	18.85	5.99	5.38986	0.2	0.85	3.17	7.61	4.71	0.21														Phillips, E. H., Sims, K. W. W., Blichert-Toft, J., Aster, R. C., Gaetani, G. A., Kyle, P. R., Wallace, P. J. & Rasmussen, D. J. (2018). The nature and evolution of mantle upwelling at Ross Island, Antarctica, with implications for the source of HIMU lavas. Earth and Planetary Science Letters 498, 38-53.	LA-ICPMS				878.295		144.943	6.40821	< d.l.	0.947818
Ross Island Volcanic Field	Ross Island	Bird			LB02							Phillips, E. H., Sims, K. W. W., Blichert-Toft, J., Aster, R. C., Gaetani, G. A., Kyle, P. R., Wallace, P. J. & Rasmussen, D. J. (2018). The nature and evolution of mantle upwelling at Ross Island, Antarctica, with implications for the source of HIMU lavas. Earth and Planetary Science Letters 498, 38-53.	XRF	55.94	0.69	19	5.73	5.15591	0.2	0.56	2.77	7.79	4.86	0.17														Phillips, E. H., Sims, K. W. W., Blichert-Toft, J., Aster, R. C., Gaetani, G. A., Kyle, P. R., Wallace, P. J. & Rasmussen, D. J. (2018). The nature and evolution of mantle upwelling at Ross Island, Antarctica, with implications for the source of HIMU lavas. Earth and Planetary Science Letters 498, 38-53.	LA-ICPMS				904.306		149.665	5.06389	0.902495	1.02882
Ross Island Volcanic Field	Ross Island	Bird			LB01							Phillips, E. H., Sims, K. W. W., Blichert-Toft, J., Aster, R. C., Gaetani, G. A., Kyle, P. R., Wallace, P. J. & Rasmussen, D. J. (2018). The nature and evolution of mantle upwelling at Ross Island, Antarctica, with implications for the source of HIMU lavas. Earth and Planetary Science Letters 498, 38-53.	XRF	56.75	0.63	19.21	5.53	4.97595	0.2	0.54	2.71	7.91	4.98	0.16														Phillips, E. H., Sims, K. W. W., Blichert-Toft, J., Aster, R. C., Gaetani, G. A., Kyle, P. R., Wallace, P. J. & Rasmussen, D. J. (2018). The nature and evolution of mantle upwelling at Ross Island, Antarctica, with implications for the source of HIMU lavas. Earth and Planetary Science Letters 498, 38-53.	LA-ICPMS				934.441		150.591	4.35488	< d.l.	0.997908
Ross Island Volcanic Field	Ross Island	Bird			AAJx2							This work (PRK)	XRF	56.75	0.47	19.61	4.04	3.63523	0.15	0.34	2.03	8.18	5.59	0.07														This work (PRK)	LA-ICPMS				1048.94		132.267		0.777071	1.27678
Ross Island Volcanic Field	Ross Island	Bird			Aver							This work (PRK)	XRF	57.18	0.475	19.735	4.1	3.68922	0.15	0.34	2.05	8.225	5.625	0.075														This work (PRK)	LA-ICPMS				1064.06		135.665		0.791822	1.28287
Ross Island Volcanic Field	Ross Island	Bird			AAJ							This work (PRK)	XRF	57.61	0.48	19.86	4.16	3.74321	0.15	0.34	2.07	8.27	5.66	0.08														This work (PRK)	LA-ICPMS				1079.17		139.064		0.806573	1.28897
Ross Island Volcanic Field	Ross Island	Bird			AAP							This work (PRK)	XRF	57.81	0.22	19.37	5.27	4.742	0.23	0.13	1.8	8.72	5.09	0.05														This work (PRK)	LA-ICPMS				1050.31		177.91		< d.l.	1.31505
Ross Island Volcanic Field	Ross Island	Cape Crozier			22970	1						Kyle, P. R. (1976). Geology, mineralogy, and geochemistry of the Late Cenozoic McMurdo Volcanic Group, Victoria Land, Antarctica. Ph. D. thesis. Victoria University of Wellington.	XRF	42.11	4.01	15.05	4.08	8.96	0.21	6.92	11.58	3.78	1.42	1.12														Kyle, P. R. (1976). Geology, mineralogy, and geochemistry of the Late Cenozoic McMurdo Volcanic Group, Victoria Land, Antarctica. Ph. D. thesis. Victoria University of Wellington.	XRF				339				121		44
Ross Island Volcanic Field	Ross Island	Cape Crozier			G15367	2						Goldich, S., Treves, S., Suhr, N. & Stuckless, J. (1975). Geochemistry of the Cenozoic volcanic rocks of Ross Island and vicinity, Antarctica. The Journal of Geology 83, 415-435.	AAS	43.47	3.28	12.85	3.18	9.67	0.19	11.78	10.6	2.93	1.09	0.58		0.09					0.07							Goldich, S., Treves, S., Suhr, N. & Stuckless, J. (1975). Geochemistry of the Cenozoic volcanic rocks of Ross Island and vicinity, Antarctica. The Journal of Geology 83, 415-435.	AAS				328	2.3	81.8		760		57
Ross Island Volcanic Field	Ross Island	Cape Crozier			CC03	3						Phillips, E. H., Sims, K. W. W., Blichert-Toft, J., Aster, R. C., Gaetani, G. A., Kyle, P. R., Wallace, P. J. & Rasmussen, D. J. (2018). The nature and evolution of mantle upwelling at Ross Island, Antarctica, with implications for the source of HIMU lavas. Earth and Planetary Science Letters 498, 38-53.	XRF	43.52	3.49	15.21	12.24	11.0137	0.2	6.79	10.35	4.02	1.74	0.84														Phillips, E. H., Sims, K. W. W., Blichert-Toft, J., Aster, R. C., Gaetani, G. A., Kyle, P. R., Wallace, P. J. & Rasmussen, D. J. (2018). The nature and evolution of mantle upwelling at Ross Island, Antarctica, with implications for the source of HIMU lavas. Earth and Planetary Science Letters 498, 38-53.	LA-ICPMS				728.83		127.021	42.2038	189.562	0.375342
Ross Island Volcanic Field	Ross Island	Cape Crozier			22977	3						Kyle, P. R. (1976). Geology, mineralogy, and geochemistry of the Late Cenozoic McMurdo Volcanic Group, Victoria Land, Antarctica. Ph. D. thesis. Victoria University of Wellington.	XRF	43.54	2.84	14.08	3.2	8.16	0.21	9.33	11.05	4.5	1.55	0.9														Kyle, P. R. (1976). Geology, mineralogy, and geochemistry of the Late Cenozoic McMurdo Volcanic Group, Victoria Land, Antarctica. Ph. D. thesis. Victoria University of Wellington.	XRF				395				390		54
Ross Island Volcanic Field	Ross Island	Cape Crozier			22964	4						Kyle, P. R. (1976). Geology, mineralogy, and geochemistry of the Late Cenozoic McMurdo Volcanic Group, Victoria Land, Antarctica. Ph. D. thesis. Victoria University of Wellington.	XRF	43.6	4.07	14.28	2.97	9.58	0.2	7.1	10.35	3.73	1.83	1.11														Kyle, P. R. (1976). Geology, mineralogy, and geochemistry of the Late Cenozoic McMurdo Volcanic Group, Victoria Land, Antarctica. Ph. D. thesis. Victoria University of Wellington.	XRF				341				186		50
Ross Island Volcanic Field	Ross Island	Cape Crozier			CC04	1						Phillips, E. H., Sims, K. W. W., Blichert-Toft, J., Aster, R. C., Gaetani, G. A., Kyle, P. R., Wallace, P. J. & Rasmussen, D. J. (2018). The nature and evolution of mantle upwelling at Ross Island, Antarctica, with implications for the source of HIMU lavas. Earth and Planetary Science Letters 498, 38-53.	XRF	43.8	2.73	14.46	11.12	10.0059	0.19	9.77	10.75	4.49	1.67	0.67														Phillips, E. H., Sims, K. W. W., Blichert-Toft, J., Aster, R. C., Gaetani, G. A., Kyle, P. R., Wallace, P. J. & Rasmussen, D. J. (2018). The nature and evolution of mantle upwelling at Ross Island, Antarctica, with implications for the source of HIMU lavas. Earth and Planetary Science Letters 498, 38-53.	LA-ICPMS				595.535		112.154	49.7447	464.529	0.594909
Ross Island Volcanic Field	Ross Island	Cape Crozier			CC03R	3						Phillips et al., 2018	XRF	43.96	3.53	15.36	12.41	11.1666	0.2	6.8	10.45	4.05	1.76	0.85														Phillips, E. H., Sims, K. W. W., Blichert-Toft, J., Aster, R. C., Gaetani, G. A., Kyle, P. R., Wallace, P. J. & Rasmussen, D. J. (2018). The nature and evolution of mantle upwelling at Ross Island, Antarctica, with implications for the source of HIMU lavas. Earth and Planetary Science Letters 498, 38-53.	LA-ICPMS				702.929		127.241	41.1434	199.305	0.336854
Ross Island Volcanic Field	Ross Island	Cape Crozier			G567	5						Goldich, S., Treves, S., Suhr, N. and Stuckless, J., 1975. Geochemistry of the Cenozoic volcanic rocks of Ross Island and vicinity, Antarctica. The Journal of Geology, 83(4): 415-435.	AAS	44	2.83	14.2	3.12	7.38	0.19	10.8	10.5	4.38	1.77	0.65		0.02					0.3							Goldich, S., Treves, S., Suhr, N. and Stuckless, J., 1975. Geochemistry of the Cenozoic volcanic rocks of Ross Island and vicinity, Antarctica. The Journal of Geology, 83(4): 415-435.	AAS				521	2.8	104.7		430		44
Ross Island Volcanic Field	Ross Island	Cape Crozier			22954	6						Kyle, P. R. (1976). Geology, mineralogy, and geochemistry of the Late Cenozoic McMurdo Volcanic Group, Victoria Land, Antarctica. Ph. D. thesis. Victoria University of Wellington.	XRF	44.5	3.48	15.27	4.43	7.41	0.2	6.82	10.69	4.05	1.82	0.85														Kyle, P. R. (1976). Geology, mineralogy, and geochemistry of the Late Cenozoic McMurdo Volcanic Group, Victoria Land, Antarctica. Ph. D. thesis. Victoria University of Wellington.	XRF				467				199		68
Ross Island Volcanic Field	Ross Island	Cape Crozier			G14870	21						Goldich, S., Treves, S., Suhr, N. & Stuckless, J. (1975). Geochemistry of the Cenozoic volcanic rocks of Ross Island and vicinity, Antarctica. The Journal of Geology 83, 415-435.	AAS	44.5	3.91	16.6	6.09	6.01	0.25	4.78	9.74	4.35	1.92	1.53		0.03					0.2	0.06						Goldich, S., Treves, S., Suhr, N. & Stuckless, J. (1975). Geochemistry of the Cenozoic volcanic rocks of Ross Island and vicinity, Antarctica. The Journal of Geology 83, 415-435.	AAS				630	3.5	169.6				34
Ross Island Volcanic Field	Ross Island	Cape Crozier			G14770	22						Goldich, S., Treves, S., Suhr, N. & Stuckless, J. (1975). Geochemistry of the Cenozoic volcanic rocks of Ross Island and vicinity, Antarctica. The Journal of Geology 83, 415-435.	AAS	44.6	3.46	16.9	11.8	0.09	0.22	3.78	9.44	5.37	2.01	1.39		0.02					0.14	0.06						Goldich, S., Treves, S., Suhr, N. & Stuckless, J. (1975). Geochemistry of the Cenozoic volcanic rocks of Ross Island and vicinity, Antarctica. The Journal of Geology 83, 415-435.	AAS				630	3.3					25
Ross Island Volcanic Field	Ross Island	Cape Crozier			P22981	7						Kyle, P. R. (1976). Geology, mineralogy, and geochemistry of the Late Cenozoic McMurdo Volcanic Group, Victoria Land, Antarctica. Ph. D. thesis. Victoria University of Wellington.	XRF	44.8	3.75	15.7	7.25	5.2	0.11	6.55	11.9	3.05	1.6	0.38							0.22	0.16						Kyle, P. R. (1976). Geology, mineralogy, and geochemistry of the Late Cenozoic McMurdo Volcanic Group, Victoria Land, Antarctica. Ph. D. thesis. Victoria University of Wellington.	XRF				450				245		49
Ross Island Volcanic Field	Ross Island	Cape Crozier			22961	8						Kyle, P. R. (1976). Geology, mineralogy, and geochemistry of the Late Cenozoic McMurdo Volcanic Group, Victoria Land, Antarctica. Ph. D. thesis. Victoria University of Wellington.	XRF	45.53	2.95	17.12	5.08	5.76	0.23	3.87	8.22	4.3	2.74	1.37									2.06					Kyle, P. R. (1976). Geology, mineralogy, and geochemistry of the Late Cenozoic McMurdo Volcanic Group, Victoria Land, Antarctica. Ph. D. thesis. Victoria University of Wellington.	XRF				551				17		33
Ross Island Volcanic Field	Ross Island	Cape Crozier			22958	9						Kyle, P. R. (1976). Geology, mineralogy, and geochemistry of the Late Cenozoic McMurdo Volcanic Group, Victoria Land, Antarctica. Ph. D. thesis. Victoria University of Wellington.	XRF	46.38	3.18	17.09	6.67	4.63	0.23	4.38	8.97	4.65	2.36	1.05														Kyle, P. R. (1976). Geology, mineralogy, and geochemistry of the Late Cenozoic McMurdo Volcanic Group, Victoria Land, Antarctica. Ph. D. thesis. Victoria University of Wellington.	XRF				530				56		26
Ross Island Volcanic Field	Ross Island	Cape Crozier				10						Prior, G. T. (1902). Report on the rock specimens collected by the Southern Cross Antarctic Expedition, British Museum.	XRF	47.4	0.63	20.27	5.38	5.48	0.17	2.94	7.59	5.78	2.73	0.85									0.23						-
Ross Island Volcanic Field	Ross Island	Cape Crozier			22962	11						Kyle, P. R. (1976). Geology, mineralogy, and geochemistry of the Late Cenozoic McMurdo Volcanic Group, Victoria Land, Antarctica. Ph. D. thesis. Victoria University of Wellington.	XRF	54.28	0.84	20.01	2.25	3.04	0.21	0.98	3.26	8.45	4.81	0.27									1.22					Kyle, P. R. (1976). Geology, mineralogy, and geochemistry of the Late Cenozoic McMurdo Volcanic Group, Victoria Land, Antarctica. Ph. D. thesis. Victoria University of Wellington.	XRF				568				22		29
Ross Island Volcanic Field	Ross Island	Cape Crozier			CC05	8						Phillips, E. H., Sims, K. W. W., Blichert-Toft, J., Aster, R. C., Gaetani, G. A., Kyle, P. R., Wallace, P. J. & Rasmussen, D. J. (2018). The nature and evolution of mantle upwelling at Ross Island, Antarctica, with implications for the source of HIMU lavas. Earth and Planetary Science Letters 498, 38-53.	XRF	56.14	0.42	19.78	5.28	4.751	0.22	0.15	2.04	8.39	5.33	0.07														Phillips, E. H., Sims, K. W. W., Blichert-Toft, J., Aster, R. C., Gaetani, G. A., Kyle, P. R., Wallace, P. J. & Rasmussen, D. J. (2018). The nature and evolution of mantle upwelling at Ross Island, Antarctica, with implications for the source of HIMU lavas. Earth and Planetary Science Letters 498, 38-53.	LA-ICPMS				1595.95		212.24	1.98351	bdl	1.10538
Ross Island Volcanic Field	Ross Island	Cape Crozier			P22984	12						Kyle, P. R. (1976). Geology, mineralogy, and geochemistry of the Late Cenozoic McMurdo Volcanic Group, Victoria Land, Antarctica. Ph. D. thesis. Victoria University of Wellington.	XRF	57.04	0.25	19.79	4.76	0.17	0.21	0.15	1.29	9.3	5.72	0.04									0.87					Kyle, P. R. (1976). Geology, mineralogy, and geochemistry of the Late Cenozoic McMurdo Volcanic Group, Victoria Land, Antarctica. Ph. D. thesis. Victoria University of Wellington.	XRF				514						7
Ross Island Volcanic Field	Ross Island	Cape Crozier			P22973	13						Kyle, P. R. (1976). Geology, mineralogy, and geochemistry of the Late Cenozoic McMurdo Volcanic Group, Victoria Land, Antarctica. Ph. D. thesis. Victoria University of Wellington.	XRF	57.07	0.38	20.02	2.88	2.12	0.22	0.12	2.04	8.65	5.43	0.05									0.61					Kyle, P. R. (1976). Geology, mineralogy, and geochemistry of the Late Cenozoic McMurdo Volcanic Group, Victoria Land, Antarctica. Ph. D. thesis. Victoria University of Wellington.	XRF				1306						8
Ross Island Volcanic Field	Ross Island	Cape Crozier			P22974	14						Kyle, P. R. (1976). Geology, mineralogy, and geochemistry of the Late Cenozoic McMurdo Volcanic Group, Victoria Land, Antarctica. Ph. D. thesis. Victoria University of Wellington.	XRF	57.16	0.38	20.03	4.93	0.2	0.22	0.17	1.76	8.6	5.4	0.06									0.84					Kyle, P. R. (1976). Geology, mineralogy, and geochemistry of the Late Cenozoic McMurdo Volcanic Group, Victoria Land, Antarctica. Ph. D. thesis. Victoria University of Wellington.	XRF				1393						8
Ross Island Volcanic Field	Ross Island	Cape Crozier			P22986	15						Kyle, P. R. (1976). Geology, mineralogy, and geochemistry of the Late Cenozoic McMurdo Volcanic Group, Victoria Land, Antarctica. Ph. D. thesis. Victoria University of Wellington.	XRF	57.2	0.25	19.6	2.75	2.25	0.05	0.5	1.85	8.25	5.85	0.03							0.36	0.36						Kyle, P. R. (1976). Geology, mineralogy, and geochemistry of the Late Cenozoic McMurdo Volcanic Group, Victoria Land, Antarctica. Ph. D. thesis. Victoria University of Wellington.	XRF				690						7
Ross Island Volcanic Field	Ross Island	Cape Crozier			P22971	16						Kyle, P. R. (1976). Geology, mineralogy, and geochemistry of the Late Cenozoic McMurdo Volcanic Group, Victoria Land, Antarctica. Ph. D. thesis. Victoria University of Wellington.	XRF	57.4	0.29	19.92	3.6	1.3	0.2	0.17	1.57	8.5	5.83	0.05									0.63					Kyle, P. R. (1976). Geology, mineralogy, and geochemistry of the Late Cenozoic McMurdo Volcanic Group, Victoria Land, Antarctica. Ph. D. thesis. Victoria University of Wellington.	XRF				593				bdl		7
Ross Island Volcanic Field	Ross Island	Cape Crozier			P22985	17						Kyle, P. R. (1976). Geology, mineralogy, and geochemistry of the Late Cenozoic McMurdo Volcanic Group, Victoria Land, Antarctica. Ph. D. thesis. Victoria University of Wellington.	XRF	57.79	0.27	19.74	2.5	2.34	0.2	0.16	1.57	8.2	5.79	0.06									0.51					Kyle, P. R. (1976). Geology, mineralogy, and geochemistry of the Late Cenozoic McMurdo Volcanic Group, Victoria Land, Antarctica. Ph. D. thesis. Victoria University of Wellington.	XRF				655						6
Ross Island Volcanic Field	Ross Island	Cape Crozier			G1167	18						Goldich, S., Treves, S., Suhr, N. & Stuckless, J. (1975). Geochemistry of the Cenozoic volcanic rocks of Ross Island and vicinity, Antarctica. The Journal of Geology 83, 415-435.	AAS	57.9	0.44	19.6	5.16	0.58	0.21	0.44	2.17	8.18	4.97	0.11		0.04					0.01	0.03						Goldich, S., Treves, S., Suhr, N. & Stuckless, J. (1975). Geochemistry of the Cenozoic volcanic rocks of Ross Island and vicinity, Antarctica. The Journal of Geology 83, 415-435.	AAS				990	5.3	228		bdl		25
Ross Island Volcanic Field	Ross Island	Cape Crozier				19						Prior, G. T. (1907). Report on the rock specimens collected during the “Discovery” Antarctic Expedition, 1901 - 1904. Natural History 1, 101-160.	XRF	57.95	0.4	20.43	3.43	1.35	0.07	0.26	1.9	8.32	5.96	0.07							0.23	0.39							-
Ross Island Volcanic Field	Ross Island	Cape Crozier			22952	20						Kyle, P. R. (1976). Geology, mineralogy, and geochemistry of the Late Cenozoic McMurdo Volcanic Group, Victoria Land, Antarctica. Ph. D. thesis. Victoria University of Wellington.	XRF	58.27	0.42	19.38	3.67	1.78	0.22	0.41	1.95	8.1	5.15	0.12									0.46					Kyle, P. R. (1976). Geology, mineralogy, and geochemistry of the Late Cenozoic McMurdo Volcanic Group, Victoria Land, Antarctica. Ph. D. thesis. Victoria University of Wellington.	XRF				928				bdl		7
Ross Island Volcanic Field	Ross Island	Erebus - Flank			83435							Kyle, P. R. (1976). Geology, mineralogy, and geochemistry of the Late Cenozoic McMurdo Volcanic Group, Victoria Land, Antarctica. Ph. D. thesis. Victoria University of Wellington.	XRF	43.32	3.78	15.38		12.08	0.22	6.77	10.66	4.63	1.72	1.21							0.03	0.18			AAS	12.33		Kyle, P. R. (1976). Geology, mineralogy, and geochemistry of the Late Cenozoic McMurdo Volcanic Group, Victoria Land, Antarctica. Ph. D. thesis. Victoria University of Wellington.	XRF				517		149.8		139	0.38	42.65
Ross Island Volcanic Field	Ross Island	Erebus - Flank			KBRN-1							Iacovino, K. (2014). An unexpected journey: experimental insights into magma and volatile transport beneath Erebus volcano, Antarctica (Doctoral thesis). University of Cambridge, 224.	XRF	43.76	2.996	16.723		10.5398	0.2339	3.878	8.882	4.49	1.903	1.48		0.15					4.2							Iacovino, K. (2014). An unexpected journey: experimental insights into magma and volatile transport beneath Erebus volcano, Antarctica (Doctoral thesis). University of Cambridge, 224.	LA-ICPMS		1.174		526.7	2.682	168.9	21.07	7.517	2.945	13.37
Ross Island Volcanic Field	Ross Island	Erebus - Flank	Cape Barn	Basanite	83437		1.311		Sims, K.W.W., Blichert-Toft, J., Kyle, P.R., Pichat, S., Gauthier, P.-J., Blusztajn, J., Kelly, P., Ball, L. and Layne, G., 2008. A Sr, Nd, Hf, and Pb isotope perspective on the genesis and long-term evolution of alkaline magmas from Erebus volcano, Antarctica. J. Volcanol. Geotherm. Res., 177(3): 606-618.			Kyle, P. R. (1976). Geology, mineralogy, and geochemistry of the Late Cenozoic McMurdo Volcanic Group, Victoria Land, Antarctica. Ph. D. thesis. Victoria University of Wellington.	XRF	43.97	3.75	16.64		11.44	0.24	4.92	9.62	4.64	2.07	1.51							0.44	0.01			AAS	11.65	4.64	Kyle, P. R. (1976). Geology, mineralogy, and geochemistry of the Late Cenozoic McMurdo Volcanic Group, Victoria Land, Antarctica. Ph. D. thesis. Victoria University of Wellington.	XRF				654	2.38	164.5		34	0.4	22.53
Ross Island Volcanic Field	Ross Island	Erebus - Flank			KFANG-03							Iacovino, K. (2014). An unexpected journey: experimental insights into magma and volatile transport beneath Erebus volcano, Antarctica (Doctoral thesis). University of Cambridge, 224.	XRF	44.13	3.706	16.535		11.3136	0.2341	4.571	9.585	4.67	2.075	1.55							0.42							Iacovino, K. (2014). An unexpected journey: experimental insights into magma and volatile transport beneath Erebus volcano, Antarctica (Doctoral thesis). University of Cambridge, 224.	LA-ICPMS		4.56		621.8	2.287	168	28.86	23.44	3.451	25.53
Ross Island Volcanic Field	Ross Island	Erebus - Flank			RI61							Phillips, E. H., Sims, K. W. W., Blichert-Toft, J., Aster, R. C., Gaetani, G. A., Kyle, P. R., Wallace, P. J. & Rasmussen, D. J. (2018). The nature and evolution of mantle upwelling at Ross Island, Antarctica, with implications for the source of HIMU lavas. Earth and Planetary Science Letters 498, 38-53.	XRF	44.42	3.18	16.84		11.1306	0.25	4	9.18	4.82	2.06	1.65														Phillips, E. H., Sims, K. W. W., Blichert-Toft, J., Aster, R. C., Gaetani, G. A., Kyle, P. R., Wallace, P. J. & Rasmussen, D. J. (2018). The nature and evolution of mantle upwelling at Ross Island, Antarctica, with implications for the source of HIMU lavas. Earth and Planetary Science Letters 498, 38-53.	LA-ICPMS				605.371		207.981	23.3957		0.280306
Ross Island Volcanic Field	Ross Island	Erebus - Flank			79300							Kyle, P. R. (1976). Geology, mineralogy, and geochemistry of the Late Cenozoic McMurdo Volcanic Group, Victoria Land, Antarctica. Ph. D. thesis. Victoria University of Wellington.	XRF	44.5	3.69	16.77		11.03	0.23	4.69	9.71	4.84	2.15	1.56							0.56	0.02			AAS	11.35	4.6	Kyle, P. R. (1976). Geology, mineralogy, and geochemistry of the Late Cenozoic McMurdo Volcanic Group, Victoria Land, Antarctica. Ph. D. thesis. Victoria University of Wellington.	XRF				650	1.99	170.1		24	0.4	22
Ross Island Volcanic Field	Ross Island	Erebus - Flank	Cape Barn	Ne-hawaiite	83432		1.311		Sims, K.W.W., Blichert-Toft, J., Kyle, P.R., Pichat, S., Gauthier, P.-J., Blusztajn, J., Kelly, P., Ball, L. and Layne, G., 2008. A Sr, Nd, Hf, and Pb isotope perspective on the genesis and long-term evolution of alkaline magmas from Erebus volcano, Antarctica. J. Volcanol. Geotherm. Res., 177(3): 606-618.			Kyle, P. R. (1976). Geology, mineralogy, and geochemistry of the Late Cenozoic McMurdo Volcanic Group, Victoria Land, Antarctica. Ph. D. thesis. Victoria University of Wellington.	XRF	44.89	3.19	16.96		11.23	0.25	4.21	9.28	5.24	2.07	1.69							0.13	0.03			AAS	11.48		Kyle, P. R. (1976). Geology, mineralogy, and geochemistry of the Late Cenozoic McMurdo Volcanic Group, Victoria Land, Antarctica. Ph. D. thesis. Victoria University of Wellington.	XRF		1.6		602	4.67	198.4		12	0.44	18.75
Ross Island Volcanic Field	Ross Island	Erebus - Flank			83405							Kyle, P. R. (1976). Geology, mineralogy, and geochemistry of the Late Cenozoic McMurdo Volcanic Group, Victoria Land, Antarctica. Ph. D. thesis. Victoria University of Wellington.	XRF	44.95	3.46	15.93		11.46	0.23	5.4	9.44	4.58	1.9	1.15							0.3	0.03						Kyle, P. R. (1976). Geology, mineralogy, and geochemistry of the Late Cenozoic McMurdo Volcanic Group, Victoria Land, Antarctica. Ph. D. thesis. Victoria University of Wellington.	XRF				614				81		40.9
Ross Island Volcanic Field	Ross Island	Erebus - Flank			25754-G							Kyle, P. R. (1976). Geology, mineralogy, and geochemistry of the Late Cenozoic McMurdo Volcanic Group, Victoria Land, Antarctica. Ph. D. thesis. Victoria University of Wellington.	XRF	44.99	3.2	16.72		10.94	0.26	3.35	6.92	5.78	2.95	1.4							1.81				AAS	10.95		Kyle, P. R. (1976). Geology, mineralogy, and geochemistry of the Late Cenozoic McMurdo Volcanic Group, Victoria Land, Antarctica. Ph. D. thesis. Victoria University of Wellington.	XRF				529		208.6		12	0.59	52
Ross Island Volcanic Field	Ross Island	Erebus - Flank			83404							Kyle, P. R. (1976). Geology, mineralogy, and geochemistry of the Late Cenozoic McMurdo Volcanic Group, Victoria Land, Antarctica. Ph. D. thesis. Victoria University of Wellington.	XRF	45.01	3.47	16.06		11.57	0.23	5.42	9.41	4.61	2.02	1.15							0.48	0.06			AAS	11.63	4.56	Kyle, P. R. (1976). Geology, mineralogy, and geochemistry of the Late Cenozoic McMurdo Volcanic Group, Victoria Land, Antarctica. Ph. D. thesis. Victoria University of Wellington.	XRF				610		149.4		89	0.38	36.2
Ross Island Volcanic Field	Ross Island	Erebus - Flank			83406							Kyle, P. R. (1976). Geology, mineralogy, and geochemistry of the Late Cenozoic McMurdo Volcanic Group, Victoria Land, Antarctica. Ph. D. thesis. Victoria University of Wellington.	XRF	45.16	3.32	16.31		11.29	0.23	4.98	8.98	4.85	2	1.18							0.3	0.03						Kyle, P. R. (1976). Geology, mineralogy, and geochemistry of the Late Cenozoic McMurdo Volcanic Group, Victoria Land, Antarctica. Ph. D. thesis. Victoria University of Wellington.	XRF				646				67		36.3
Ross Island Volcanic Field	Ross Island	Erebus - Flank			83426							Kyle, P. R. (1976). Geology, mineralogy, and geochemistry of the Late Cenozoic McMurdo Volcanic Group, Victoria Land, Antarctica. Ph. D. thesis. Victoria University of Wellington.	XRF	45.36	3.1	17.27		10.98	0.24	4.13	9.05	5.26	2.13	1.53							0.27	0.02			AAS	11.05		Kyle, P. R. (1976). Geology, mineralogy, and geochemistry of the Late Cenozoic McMurdo Volcanic Group, Victoria Land, Antarctica. Ph. D. thesis. Victoria University of Wellington.	XRF		1.1		591		181.3		13	0.43	16.46
Ross Island Volcanic Field	Ross Island	Erebus - Flank			83428							Kyle, P. R. (1976). Geology, mineralogy, and geochemistry of the Late Cenozoic McMurdo Volcanic Group, Victoria Land, Antarctica. Ph. D. thesis. Victoria University of Wellington.	XRF	45.54	3.1	17.37		10.94	0.24	4.11	9.14	4.93	2.1	1.54							0.34	0						Kyle, P. R. (1976). Geology, mineralogy, and geochemistry of the Late Cenozoic McMurdo Volcanic Group, Victoria Land, Antarctica. Ph. D. thesis. Victoria University of Wellington.	XRF				626				13		17.1
Ross Island Volcanic Field	Ross Island	Erebus - Flank			25758-G							Kyle, P. R. (1976). Geology, mineralogy, and geochemistry of the Late Cenozoic McMurdo Volcanic Group, Victoria Land, Antarctica. Ph. D. thesis. Victoria University of Wellington.	XRF	45.7	3.21	16.83		11.08	0.26	3.26	6.85	5.75	3.2	1.45							1.24				AAS	10.92	5.69	Kyle, P. R. (1976). Geology, mineralogy, and geochemistry of the Late Cenozoic McMurdo Volcanic Group, Victoria Land, Antarctica. Ph. D. thesis. Victoria University of Wellington.	XRF						218.02			0.65
Ross Island Volcanic Field	Ross Island	Erebus - Flank			AW82044							Kyle, P. R. (1976). Geology, mineralogy, and geochemistry of the Late Cenozoic McMurdo Volcanic Group, Victoria Land, Antarctica. Ph. D. thesis. Victoria University of Wellington.	XRF	46.2	3.16	16.07		11.11	0.24	4.74	8.05	4.74	3.11	1.16							0.33	0.1			AAS	11.1	4.8	Kyle, P. R. (1976). Geology, mineralogy, and geochemistry of the Late Cenozoic McMurdo Volcanic Group, Victoria Land, Antarctica. Ph. D. thesis. Victoria University of Wellington.	XRF		0.7		736		189.5		59	0.53	46.22
Ross Island Volcanic Field	Ross Island	Erebus - Flank			83427							Kyle, P. R. (1976). Geology, mineralogy, and geochemistry of the Late Cenozoic McMurdo Volcanic Group, Victoria Land, Antarctica. Ph. D. thesis. Victoria University of Wellington.	XRF	46.21	2.96	17.57		10.57	0.25	4.11	8.82	5.83	2.17	1.45							0.09	0.02						Kyle, P. R. (1976). Geology, mineralogy, and geochemistry of the Late Cenozoic McMurdo Volcanic Group, Victoria Land, Antarctica. Ph. D. thesis. Victoria University of Wellington.	XRF				602				18		19.87
Ross Island Volcanic Field	Ross Island	Erebus - Flank			KFANG-02							Iacovino, K. (2014). An unexpected journey: experimental insights into magma and volatile transport beneath Erebus volcano, Antarctica (Doctoral thesis). University of Cambridge, 224.	XRF	46.26	2.944	17.51		10.1501	0.2213	3.908	7.479	5.61	2.714	1.21		0.04					0.72							Iacovino, K. (2014). An unexpected journey: experimental insights into magma and volatile transport beneath Erebus volcano, Antarctica (Doctoral thesis). University of Cambridge, 224.	LA-ICPMS		1.539		618.8	3.409	161.2	24.58	23.49	4.377	29.17
Ross Island Volcanic Field	Ross Island	Erebus - Flank			AW82032							Kyle, P. R. (1976). Geology, mineralogy, and geochemistry of the Late Cenozoic McMurdo Volcanic Group, Victoria Land, Antarctica. Ph. D. thesis. Victoria University of Wellington.	XRF	46.29	3.13	16.39		10.89	0.23	5.34	9.01	4.72	2.42	1.08							0.24	0.12						Kyle, P. R. (1976). Geology, mineralogy, and geochemistry of the Late Cenozoic McMurdo Volcanic Group, Victoria Land, Antarctica. Ph. D. thesis. Victoria University of Wellington.	XRF				693				71		49.26
Ross Island Volcanic Field	Ross Island	Erebus - Flank			AW82029							Kyle, P. R. (1976). Geology, mineralogy, and geochemistry of the Late Cenozoic McMurdo Volcanic Group, Victoria Land, Antarctica. Ph. D. thesis. Victoria University of Wellington.	XRF	46.86	2.86	17.72		9.76	0.23	3.46	7.36	6.35	2.49	1.24							0.61	0.16						Kyle, P. R. (1976). Geology, mineralogy, and geochemistry of the Late Cenozoic McMurdo Volcanic Group, Victoria Land, Antarctica. Ph. D. thesis. Victoria University of Wellington.	XRF				732				23		39.33
Ross Island Volcanic Field	Ross Island	Erebus - Flank			83439							Kyle, P. R. (1976). Geology, mineralogy, and geochemistry of the Late Cenozoic McMurdo Volcanic Group, Victoria Land, Antarctica. Ph. D. thesis. Victoria University of Wellington.	XRF	47.01	2.76	17.53		9.96	0.24	3.66	7.3	5.51	2.69	1.44							0.1	0.01			AAS	10.05	5.49	Kyle, P. R. (1976). Geology, mineralogy, and geochemistry of the Late Cenozoic McMurdo Volcanic Group, Victoria Land, Antarctica. Ph. D. thesis. Victoria University of Wellington.	XRF		2		757		194.7		9	0.52	20.34
Ross Island Volcanic Field	Ross Island	Erebus - Flank			83438							Kyle, P. R. (1976). Geology, mineralogy, and geochemistry of the Late Cenozoic McMurdo Volcanic Group, Victoria Land, Antarctica. Ph. D. thesis. Victoria University of Wellington.	XRF	47.17	2.76	17.63		9.68	0.23	3.68	7.29	5.68	2.88	1.26							0.21	0.04						Kyle, P. R. (1976). Geology, mineralogy, and geochemistry of the Late Cenozoic McMurdo Volcanic Group, Victoria Land, Antarctica. Ph. D. thesis. Victoria University of Wellington.	XRF				761				10		27.64
Ross Island Volcanic Field	Ross Island	Erebus - Flank			AW82038							Kyle, P. R. (1976). Geology, mineralogy, and geochemistry of the Late Cenozoic McMurdo Volcanic Group, Victoria Land, Antarctica. Ph. D. thesis. Victoria University of Wellington.	XRF	47.18	2.72	18.24		9.33	0.22	3.13	7.51	5.86	2.83	1.22							0.78	0.17			AAS	9.52	5.75	Kyle, P. R. (1976). Geology, mineralogy, and geochemistry of the Late Cenozoic McMurdo Volcanic Group, Victoria Land, Antarctica. Ph. D. thesis. Victoria University of Wellington.	XRF		1.2		771		195.3		26	0.62	55.75
Ross Island Volcanic Field	Ross Island	Erebus - Flank			83418							Kyle, P. R. (1976). Geology, mineralogy, and geochemistry of the Late Cenozoic McMurdo Volcanic Group, Victoria Land, Antarctica. Ph. D. thesis. Victoria University of Wellington.	XRF	47.26	2.84	17.7		10.09	0.23	3.78	7.95	5.14	2.36	1.15							0.44	0.12						Kyle, P. R. (1976). Geology, mineralogy, and geochemistry of the Late Cenozoic McMurdo Volcanic Group, Victoria Land, Antarctica. Ph. D. thesis. Victoria University of Wellington.	XRF				746				17		33.91
Ross Island Volcanic Field	Ross Island	Erebus - Flank			25754							Kyle, P. R. (1976). Geology, mineralogy, and geochemistry of the Late Cenozoic McMurdo Volcanic Group, Victoria Land, Antarctica. Ph. D. thesis. Victoria University of Wellington.	XRF	47.27	2.43	19.31		8.41	0.22	2.5	7.78	5.61	2.52	1.19							1.58				AAS	9.18	5.68	Kyle, P. R. (1976). Geology, mineralogy, and geochemistry of the Late Cenozoic McMurdo Volcanic Group, Victoria Land, Antarctica. Ph. D. thesis. Victoria University of Wellington.	XRF				483		188.2		30	0.54	41
Ross Island Volcanic Field	Ross Island	Erebus - Flank			25758							Kyle, P. R. (1976). Geology, mineralogy, and geochemistry of the Late Cenozoic McMurdo Volcanic Group, Victoria Land, Antarctica. Ph. D. thesis. Victoria University of Wellington.	XRF	47.44	2.49	19.3		8.54	0.2	2.65	7.75	5.68	2.66	1.21							1.08				AAS	8.41	5.6	Kyle, P. R. (1976). Geology, mineralogy, and geochemistry of the Late Cenozoic McMurdo Volcanic Group, Victoria Land, Antarctica. Ph. D. thesis. Victoria University of Wellington.	XRF				593		174.38		5	0.6	44
Ross Island Volcanic Field	Ross Island	Erebus - Flank			25774							Kyle, P. R. (1976). Geology, mineralogy, and geochemistry of the Late Cenozoic McMurdo Volcanic Group, Victoria Land, Antarctica. Ph. D. thesis. Victoria University of Wellington.	XRF	47.49	2.71	18.63		8.94	0.22	3.41	7.41	5.73	2.92	1.12							0.06				AAS	9.02	5.7	Kyle, P. R. (1976). Geology, mineralogy, and geochemistry of the Late Cenozoic McMurdo Volcanic Group, Victoria Land, Antarctica. Ph. D. thesis. Victoria University of Wellington.	XRF				549		167.2		31	0.66	0
Ross Island Volcanic Field	Ross Island	Erebus - Flank			83441							Kyle, P. R. (1976). Geology, mineralogy, and geochemistry of the Late Cenozoic McMurdo Volcanic Group, Victoria Land, Antarctica. Ph. D. thesis. Victoria University of Wellington.	XRF	47.59	2.72	17.86		9.45	0.24	3.84	7.22	5.86	2.79	1.25							0.18	0.1						Kyle, P. R. (1976). Geology, mineralogy, and geochemistry of the Late Cenozoic McMurdo Volcanic Group, Victoria Land, Antarctica. Ph. D. thesis. Victoria University of Wellington.	XRF				769				11		30.17
Ross Island Volcanic Field	Ross Island	Erebus - Flank			83436							Kyle, P. R. (1976). Geology, mineralogy, and geochemistry of the Late Cenozoic McMurdo Volcanic Group, Victoria Land, Antarctica. Ph. D. thesis. Victoria University of Wellington.	XRF	47.62	2.49	19.51		8.34	0.19	2.98	8.78	5.18	2.16	1.06							0.07	0.1						Kyle, P. R. (1976). Geology, mineralogy, and geochemistry of the Late Cenozoic McMurdo Volcanic Group, Victoria Land, Antarctica. Ph. D. thesis. Victoria University of Wellington.	XRF				599				30		41.86
Ross Island Volcanic Field	Ross Island	Erebus - Flank			83409							Kyle, P. R. (1976). Geology, mineralogy, and geochemistry of the Late Cenozoic McMurdo Volcanic Group, Victoria Land, Antarctica. Ph. D. thesis. Victoria University of Wellington.	XRF	48.22	2.6	17.49		9.59	0.23	3.47	6.79	5.61	3.27	1.19							0.17	0.12			AAS	9.79	5.65	Kyle, P. R. (1976). Geology, mineralogy, and geochemistry of the Late Cenozoic McMurdo Volcanic Group, Victoria Land, Antarctica. Ph. D. thesis. Victoria University of Wellington.	XRF		1.8		819	4.39	205.7		30	0.7	31.45
Ross Island Volcanic Field	Ross Island	Erebus - Flank			AW82041							Kyle, P. R. (1976). Geology, mineralogy, and geochemistry of the Late Cenozoic McMurdo Volcanic Group, Victoria Land, Antarctica. Ph. D. thesis. Victoria University of Wellington.	XRF	48.44	2.38	18.58		8.67	0.21	2.59	6.88	5.83	3.1	1.05							1.12	0.18						Kyle, P. R. (1976). Geology, mineralogy, and geochemistry of the Late Cenozoic McMurdo Volcanic Group, Victoria Land, Antarctica. Ph. D. thesis. Victoria University of Wellington.	XRF				809				8		28.95
[truncated: 266 more rows]
[truncated: 96 more columns]

## Sheet: EVP Whole rock - recalculated
Area	Locality	Comment 1	Comment 2	TAS Classification	Sample #	Field I.D.	Age (Ma)	Age error (Ma)	Age reference	Mg#	D.I	Majors reference	method	SiO2	TiO2	Al2O3	Fe2O3	FeO	MnO	MgO	CaO	Na2O	K2O	P2O5	Total	CO2	Traces reference	Method	Ag	As	B	Ba	Be	Ce	Cl	Co	Cr	Cs	Cu	Dy	Er	Eu	F	Ga	Gd	Hf	Ho	La	Li
[truncated: 895 more rows]
[truncated: 54 more columns]

## Sheet: Cpx
					Liquid composition - in weight percent												Cations on the basis of 6 oxygens														1996				2003				2008		2017								Putirka 2008
[truncated: 49 more rows]
[truncated: 195 more columns]

[truncated: 4 more sheets: Mt.Erebus Bombs, RI-Englacial Tephra, Andrill, Modelling]
